# Supplementary material
Source: Research Square preprint supplement (doi:10.21203/rs.3.rs-8715774/v1)
Supplement: Supplementary file 1 [file 06bc580cc4e40b9adfa3e2c2.docx]

**Supplementary table S1. Baseline Characteristics and Homogeneity Test Between Training and Validation Sets**

| **Variables** | **Total (n = 639)** | **Validation set (n = 192)** | **Training set (n = 447)** | **Statistic** | **P** |
| --- | --- | --- | --- | --- | --- |
|
| **Demographic variables** |  |  |  |  |  |
| Age, years | 70.88 ± 11.12 | 71.53 ± 11.25 | 70.60 ± 11.06 | t=0.97 | 0.333 |
| Weight, kg | 84.92 ± 27.96 | 85.70 ± 28.75 | 84.58 ± 27.63 | t=0.46 | 0.642 |
| Gender, n(%) |  |  |  | χ²=0.40 | 0.529 |
| Male | 315 (49.30) | 91 (47.40) | 224 (50.11) |  |  |
| Female | 324 (50.70) | 101 (52.60) | 223 (49.89) |  |  |
| Race, n(%) |  |  |  | χ²=0.23 | 0.629 |
| White | 397 (62.13) | 122 (63.54) | 275 (61.52) |  |  |
| Others | 242 (37.87) | 70 (36.46) | 172 (38.48) |  |  |
| **Vital signs** |  |  |  |  |  |
| HR, beats/min | 92.57 ± 20.30 | 93.07 ± 21.50 | 92.35 ± 19.78 | t=0.41 | 0.683 |
| MAP, mmHg | 92.55 ± 239.34 | 83.54 ± 17.56 | 96.42 ± 285.95 | t=-0.62 | 0.533 |
| RR, times/min | 21.21 ± 6.50 | 21.19 ± 6.60 | 21.22 ± 6.47 | t=-0.04 | 0.966 |
| Spo2, % | 95.82 ± 4.18 | 95.92 ± 4.29 | 95.78 ± 4.14 | t=0.40 | 0.691 |
| **Scores** |  |  |  |  |  |
| Sofa | 5.93 ± 3.42 | 6.10 ± 3.52 | 5.85 ± 3.38 | t=0.83 | 0.404 |
| Charlson | 6.34 ± 2.60 | 6.32 ± 2.61 | 6.35 ± 2.60 | t=-0.12 | 0.908 |
| **Comorbidities** |  |  |  |  |  |
| Hypertension, n(%) |  |  |  | χ²=1.56 | 0.212 |
| No | 360 (56.34) | 101 (52.60) | 259 (57.94) |  |  |
| Yes | 279 (43.66) | 91 (47.40) | 188 (42.06) |  |  |
| Diabetes, n(%) |  |  |  | χ²=0.29 | 0.588 |
| No | 443 (69.33) | 136 (70.83) | 307 (68.68) |  |  |
| Yes | 196 (30.67) | 56 (29.17) | 140 (31.32) |  |  |
| Heart failure, n(%) |  |  |  | χ²=0.02 | 0.897 |
| No | 322 (50.39) | 96 (50.00) | 226 (50.56) |  |  |
| Yes | 317 (49.61) | 96 (50.00) | 221 (49.44) |  |  |
| Acute renal failure, n(%) |  |  |  | χ²=0.05 | 0.829 |
| No | 322 (50.39) | 98 (51.04) | 224 (50.11) |  |  |
| Yes | 317 (49.61) | 94 (48.96) | 223 (49.89) |  |  |
| Cirrhosis, n(%) |  |  |  | χ²=0.09 | 0.767 |
| No | 610 (95.46) | 184 (95.83) | 426 (95.30) |  |  |
| Yes | 29 (4.54) | 8 (4.17) | 21 (4.70) |  |  |
| Stroke, n(%) |  |  |  | χ²=0.00 | 0.968 |
| No | 592 (92.64) | 178 (92.71) | 414 (92.62) |  |  |
| Yes | 47 (7.36) | 14 (7.29) | 33 (7.38) |  |  |
| **Treatments** |  |  |  |  |  |
| Rxglucocorticoids, n(%) |  |  |  | χ²=0.07 | 0.786 |
| No | 291 (45.54) | 89 (46.35) | 202 (45.19) |  |  |
| Yes | 348 (54.46) | 103 (53.65) | 245 (54.81) |  |  |
| Dopamine, n(%) |  |  |  | χ²=0.30 | 0.583 |
| No | 615 (96.24) | 186 (96.88) | 429 (95.97) |  |  |
| Yes | 24 (3.76) | 6 (3.12) | 18 (4.03) |  |  |
| Epinephrine, n(%) |  |  |  | χ²=0.01 | 0.922 |
| No | 291 (45.54) | 88 (45.83) | 203 (45.41) |  |  |
| Yes | 348 (54.46) | 104 (54.17) | 244 (54.59) |  |  |
| Crrt, n(%) |  |  |  | χ²=0.51 | 0.474 |
| No | 596 (93.27) | 177 (92.19) | 419 (93.74) |  |  |
| Yes | 43 (6.73) | 15 (7.81) | 28 (6.26) |  |  |
| Ventilation, n(%) |  |  |  | χ²=3.34 | 0.068 |
| No | 16 (2.50) | 1 (0.52) | 15 (3.36) |  |  |
| Yes | 623 (97.50) | 191 (99.48) | 432 (96.64) |  |  |
| Incidence of CRRT after 72h, n(%) |  |  |  | χ²=0.27 | 0.604 |
| No | 613 (95.93) | 183 (95.31) | 430 (96.20) |  |  |
| Yes | 26 (4.07) | 9 (4.69) | 17 (3.80) |  |  |
| **Fluid Balance Dynamics** |  |  |  |  |  |
| Fluid balance on Day 1, % | 1.97 ± 3.81 | 1.78 ± 3.96 | 2.05 ± 3.74 | t=-0.81 | 0.416 |
| Fluid balance on Day 2, % | 0.21 ± 2.19 | 0.03 ± 2.46 | 0.29 ± 2.05 | t=-1.28 | 0.200 |
| Fluid balance on Day 3, % | -0.51 ± 1.94 | -0.67 ± 2.05 | -0.45 ± 1.90 | t=-1.29 | 0.197 |
| Rate of fluid balance change, % | -1.24 ± 2.07 | -1.22 ± 2.14 | -1.25 ± 2.04 | t=0.14 | 0.886 |
| Cumulative fluid balance over 3 days, % | 1.67 ± 5.78 | 1.15 ± 6.38 | 1.89 ± 5.49 | t=-1.49 | 0.136 |
| **Laboratory parameters** |  |  |  |  |  |
| Creatinine, mg/dL | 1.28 ± 0.93 | 1.35 ± 1.03 | 1.26 ± 0.89 | t=1.14 | 0.253 |
| Pt, seconds | 15.75 ± 7.82 | 15.99 ± 8.65 | 15.65 ± 7.45 | t=0.51 | 0.609 |
| Inrpt | 1.47 ± 0.92 | 1.48 ± 0.86 | 1.46 ± 0.95 | t=0.23 | 0.821 |
| Ptt, seconds | 37.01 ± 23.18 | 40.24 ± 28.54 | 35.63 ± 20.34 | t=2.03 | 0.043* |
| White blood cells,10⁹/L | 12.77 ± 7.23 | 12.28 ± 7.74 | 12.98 ± 7.00 | t=-1.12 | 0.265 |
| Red blood cells, 10⁹/L | 3.69 (3.15, 4.22) | 3.62 (3.11, 4.25) | 3.70 (3.17, 4.22) | Z=-0.57 | 0.567 |
| RDW, % | 15.42 ± 2.35 | 15.32 ± 2.21 | 15.47 ± 2.41 | t=-0.73 | 0.464 |
| Sodium, mmol/L | 139.00 ± 5.37 | 138.96 ± 5.60 | 139.02 ± 5.27 | t=-0.12 | 0.903 |
| Potassium, mmol/L | 4.43 ± 0.83 | 4.41 ± 0.78 | 4.43 ± 0.85 | t=-0.32 | 0.751 |
| Calciumtotal, mg/dL | 8.33 ± 0.81 | 8.29 ± 0.83 | 8.34 ± 0.79 | t=-0.74 | 0.462 |
| Glucose, mg/dL | 155.65 ± 65.46 | 156.36 ± 66.15 | 155.34 ± 65.23 | t=0.18 | 0.858 |
| Aniongap, mmol/L | 13.99 ± 3.99 | 14.18 ± 4.01 | 13.91 ± 3.98 | t=0.77 | 0.443 |
| Base excess, mmol/L | 1.52 ± 5.65 | 1.49 ± 5.65 | 1.53 ± 5.65 | t=-0.08 | 0.934 |

|  |
| --- |

Table Footnotes: t, t-test; Z, mann-whitney test; χ², Chi-square test; *: p<0.05; AECOPD, acute exacerbation of chronic obstructive pulmonary disease; HR, heart rate; MAP, mean arterial Pressure; RR, respiratory rate; SpO₂, peripheral capillary oxygen saturation; SOFA, sequential organ failure assessment; Charlson, charlson comorbidity index; PT, prothrombin time; aPTT, activated partial thromboplastin time; RDW, red cell distribution width; CRRT, continuous renal replacement therapy.
