# Supplementary material
Source: Research Square preprint supplement (doi:10.21203/rs.3.rs-8715774/v1)
Supplement: Supplementary file 2 [file 23344ec6e4f0cc16da8e9d4a.docx]

**Supplementary Table S2. Confusion matrix of the prediction model in the training and validation cohorts.**

| Data | AUC (95%CI) | Accuracy (95%CI) | Sensitivity (95%CI) | Specificity (95%CI) | PPV (95%CI) | NPV (95%CI) | cut off |
| --- | --- | --- | --- | --- | --- | --- | --- |
|
| Train | 0.75 (0.70-0.80) | 0.70 (0.65-0.74) | 0.63 (0.54 - 0.72) | 0.72 (0.67 - 0.77) | 0.42 (0.34 - 0.49) | 0.86 (0.82 - 0.90) | 0.259 |
| validation | 0.75 (0.68-0.83) | 0.71 (0.64-0.78) | 0.60 (0.46 - 0.74) | 0.75 (0.68 - 0.82) | 0.44 (0.32 - 0.56) | 0.85 (0.79 - 0.91) | 0.259 |

AUC, area under the receiver operating characteristic curve; CI, confidence interval; PPV, positive predictive value; NPV, negative predictive value.
