# Supplementary material
Source: Research Square preprint supplement (doi:10.21203/rs.3.rs-8715774/v1)
Supplement: Supplementary file 3 [file 7e3d2576a833ef71682e4287.xlsx]

## Sheet: Primary data
subject_id	stay_id	hadm_id	age	gender	race	weight	height	first_vitalhr	first_vitalnbpm	first_vitalrr	first_vitalspo2	sofa	charlson	diaht	diadm2	diadm1	diahf	diaarf	diacirrhosis	diastroke	crrt_day	crrt	crrt_first_time	ventilation_hour	ventilation	ventilation_first_time	icu_intime	day_1_fluid_balance	day_2_fluid_balance	day_3_fluid_balance	rxglucocorticoids	rxglucocorticoidstotalval	dopamine	dopaminetotalval	epinephrine	epinephrinetotalval	hosp_survival_day	hosp_day	Death_within_hosp_28days	first_creatinine	first_albumin	first_alanineaminotransferasealt	first_asparateaminotransferaseast	first_bilirubintotal	first_estimatedgfrmdrdequation1	first_estimatedgfrmdrdequation2	first_pt	first_inrpt	first_ptt
10001884	37510196	26184834	77	2	2	65	157	38	46	10	98	8	5	1	0	0	0	0	0	0	0	0	0	118	1	12/1/2131 21:00:00	11/1/2131 04:20:05	37.48	-114.43	-175.98	1	250	1	400	0	0	12.14	12.36	1	1.1	3.5	167	134	0.4	NA	NA	15.3	1.4	21.3
10026868	31030669	24587784	87	1	1	91	NA	103	68	9	91	2	7	1	1	0	0	0	0	0	0	0	0	144.63	1	25/10/2149 17:22:00	25/10/2149 16:35:00	1120	-1632.5	-1094.33	1	5	0	0	0	0	18.39	8.05	1	0.6	2.9	31	27	0.7	NA	NA	13.2	1.1	24.1
10049041	33222233	25320808	60	1	2	70.8	173	127	78	16	100	7	2	1	0	0	0	0	0	0	0	0	0	447.47	1	19/12/2163 16:00:00	19/12/2163 15:46:00	2033.76	-725.84	913.43	1	40	0	0	1	75	NA	20.11	0	0.7	3.1	14	16	0.3	NA	NA	14.9	1.4	28.5
10055694	30350084	25049824	64	2	2	71.9	NA	93	82	20	97	9	6	0	0	0	1	1	0	0	2	1	22/7/2118 15:30:00	87	1	21/7/2118 17:00:00	21/7/2118 16:13:48	218.16	615	495	1	220	0	0	0	0	1382.48	6.23	0	3.3	NA	NA	NA	NA	NA	NA	13.6	1.3	33.6
10092227	33365234	23138040	80	2	2	106.1	163	78	65	42	99	15	6	0	0	0	0	1	0	0	0	0	0	135.5	1	30/6/2158 21:00:00	30/6/2158 20:34:00	4677.95	-115.81	-1565	1	120	0	0	1	8	41.23	22.8	0	1.8	2.9	2795	5723	1.3	NA	NA	27	2.5	25.9
10100037	35684533	25289326	66	1	1	65.1	178	87	91	16	96	4	3	0	0	0	0	0	0	0	0	0	0	25.4	1	20/11/2163 21:42:00	20/11/2163 21:21:57	-316.5	-840	-640	1	230	0	0	0	0	NA	14.85	0	0.6	3.1	58	38	0.5	NA	NA	13.3	1.2	29.9
10103748	39065443	21580264	75	2	1	75	160	67	136	16	99	4	7	0	1	0	0	0	0	0	0	0	0	73.47	1	18/9/2130 17:00:00	18/9/2130 14:29:43	1168.71	-1305	-3090	1	85	0	0	0	0	95	9.73	0	1.1	NA	25	16	0.4	NA	NA	10.5	1	26.4
10104730	33077547	23949226	70	2	1	85.6	147	91	68	28	100	3	6	1	0	1	0	1	0	0	0	0	0	118.5	1	26/11/2179 13:00:00	26/11/2179 10:20:31	723.08	-1144.24	-3444.6	0	0	0	0	1	72.5	NA	22.78	0	1	3.5	17	24	0.5	NA	NA	12.7	1.2	26.9
10116419	36274299	29477062	56	1	2	190	180	76	91	14	100	3	5	0	0	0	1	0	0	0	0	0	0	105	1	22/1/2110 08:00:00	22/1/2110 05:56:38	-1145.44	-5845.04	-3188.01	0	0	0	0	0	0	89.75	21.36	0	NA	NA	NA	NA	NA	NA	NA	NA	NA	NA
10125047	37629882	26680668	78	2	1	65.6	170	96	84	15	96	7	5	1	0	0	1	1	0	0	0	0	0	324	1	19/1/2180 00:00:00	18/1/2180 23:16:32	2951.72	-3688.03	-605.9	0	0	0	0	1	68	NA	13.59	0	0.6	3.1	98	53	0.3	NA	NA	12.2	1	22.5
10125865	39266377	23139194	48	2	1	142.6	157	75	95	19	97	8	2	0	1	0	0	0	0	0	0	0	0	116	1	17/3/2158 13:00:00	17/3/2158 12:55:31	-3147	-918.73	2182.31	0	0	0	0	0	0	113.46	15.13	0	0.7	NA	31	39	0.5	NA	NA	12.4	1	23.2
10147087	39531674	26857297	72	2	1	52.1	168	114	103	23	99	4	6	1	1	0	0	1	0	0	0	0	0	106.5	1	27/1/2113 03:00:00	27/1/2113 02:08:00	342.52	-225.29	-676.89	1	40	0	0	0	0	5.04	5.54	1	1.2	NA	NA	NA	NA	NA	NA	11.6	1.1	22.5
10150335	33705553	24113307	73	2	2	66.3	163	86	87	16	100	0	7	1	0	0	1	1	0	0	0	0	0	134	1	12/9/2144 05:00:00	9/9/2144 20:17:02	-1945.52	146.21	-1069.7	1	200	1	400	1	69	7.16	7.93	1	1	1.7	84	454	0.3	NA	NA	10.5	1	88.5
10161042	34912691	29090018	52	2	2	102.7	159	67	87	24	95	5	6	0	1	0	1	1	0	0	0	0	0	124.25	1	14/8/2177 21:45:00	14/8/2177 21:41:00	4466.95	-386.94	-1634.24	1	40	0	0	0	0	327.16	5.62	0	1.8	NA	9	10	0.3	NA	NA	11.5	1.1	29.2
10187092	39222168	20968686	92	2	1	79.5	NA	91	64	21	100	4	5	1	0	0	0	0	0	0	0	0	0	102.18	1	26/10/2182 23:00:00	26/10/2182 22:39:00	403.3	-150	-1450.51	1	80	0	0	0	0	79.11	8.91	0	0.5	NA	27	34	0.8	NA	NA	11.9	1.1	28.9
10187951	38484145	27461751	84	2	1	99.9	163	77	83	21	90	5	7	0	0	0	1	0	0	0	0	0	0	76	1	27/7/2116 00:00:00	26/7/2116 23:46:45	1585	-1160.16	-2615.15	1	80	0	0	0	0	NA	7.73	0	1.1	2.5	20	19	0.3	NA	NA	15.3	1.4	25.5
10212427	30379911	21376531	73	2	1	67.7	NA	105	84	27	98	6	4	0	0	0	0	0	0	0	0	0	0	57.03	1	12/5/2168 14:34:00	12/5/2168 14:02:00	3504.9	1205	-40	1	220	0	0	0	0	9.48	4.2	1	1.1	NA	15	28	0.4	NA	NA	13.9	1.3	25.4
10226912	37143047	23853148	74	1	2	86.4	NA	49	59	21	91	14	6	1	0	0	1	1	0	0	0	0	0	143.05	1	4/4/2111 11:57:00	4/4/2111 11:53:19	2411.72	2632.88	889.49	0	0	1	400	1	144	6.51	7.37	1	1.2	NA	208	350	9.9	NA	NA	17.7	1.6	37.6
10232286	35388673	20559188	67	1	1	85	175	112	92	16	97	15	6	1	0	0	0	1	1	0	0	0	0	104.5	1	27/10/2143 16:00:00	26/10/2143 18:02:11	4179.58	534.84	330.12	1	20	0	0	1	16	19.25	17.92	1	3	1.9	104	212	15.1	NA	NA	27.2	2.5	49
10240102	36616884	25637992	70	1	2	59	183	80	72	34	100	8	6	1	0	0	0	1	0	0	0	0	0	523.33	1	13/4/2121 15:40:00	13/4/2121 13:21:00	2343.7	2868.78	1132.24	1	100	1	400	1	24	22.45	23.15	1	0.6	3.9	143	298	0.4	NA	NA	13	1.2	32.1
10258020	31725746	23994346	77	1	1	125.1	183	70	95	24	94	10	4	1	0	0	0	0	0	0	0	0	0	71.85	1	24/12/2122 20:09:00	24/12/2122 19:45:00	2363.22	-919.52	0	0	0	0	0	1	8	905.24	4.9	0	1.1	NA	NA	NA	NA	NA	NA	12.8	1.2	28.8
10286301	36378944	28567609	62	1	2	93.1	175	69	80	16	98	7	5	0	0	0	1	0	0	0	0	0	0	120.23	1	24/5/2140 06:46:00	24/5/2140 06:38:00	-3398.63	-4168.67	-544.95	0	0	0	0	0	0	NA	10.63	0	0.6	3.5	8	32	1.9	NA	NA	17.3	1.6	33.3
10295020	39726152	24995523	56	2	1	49.2	163	96	78	15	98	4	6	0	1	0	1	1	1	0	0	0	0	158.17	1	8/6/2147 22:30:00	8/6/2147 22:01:00	1015.2	-785.84	156.75	1	10	0	0	0	0	41.12	7.83	0	1.3	2.6	30	43	0.3	NA	NA	26.5	2.6	37.2
10321613	36398180	29807103	75	1	1	116.5	183	81	70	14	93	7	10	0	1	0	1	1	0	0	0	0	0	89.58	1	30/10/2158 20:00:00	30/10/2158 19:33:33	-884.88	-5371.8	-5126.7	1	140	0	0	1	60	447.19	25.8	0	2.3	3.2	23	22	1.3	NA	NA	37.4	3.4	36.2
10337896	33920408	23504565	71	1	1	106.7	151	82	68	20	95	9	5	1	0	0	1	1	0	0	0	0	0	307.5	1	3/7/2184 17:00:00	26/6/2184 04:10:00	6707.54	5223.93	935.66	1	522.1	0	0	1	92	449.94	21.51	0	0.9	1.9	6	18	4.8	NA	NA	14.1	1.3	53.9
10380616	33630043	22580637	82	2	1	68	NA	99	101	18	95	5	6	1	0	0	0	0	0	0	0	0	0	61	1	27/7/2131 00:00:00	25/7/2131 21:06:20	84.67	710.25	-1177.79	0	0	0	0	0	0	NA	14.37	0	1	NA	NA	NA	NA	NA	NA	12.3	1.1	27.1
10383338	37051184	28299477	62	2	1	66.6	NA	111	82	25	98	5	9	1	0	0	0	1	0	0	0	0	0	45.6	1	24/5/2136 16:00:00	24/5/2136 15:07:51	-3482.5	-1433.5	-1830.8	0	0	0	0	0	0	NA	11.78	0	0.6	NA	56	29	1	NA	NA	12.4	1	24.1
10386233	39681051	22164804	68	1	2	143	170	101	60	26	100	13	5	1	1	0	0	1	0	0	0	0	0	43	1	7/6/2157 10:00:00	2/6/2157 20:11:52	-3736.82	-3093.63	-3629.78	1	55	0	0	1	8	1198.16	16.95	0	2	3	39	25	0.2	NA	NA	12.5	1.2	29
10398333	31460673	23217649	67	2	1	105.5	163	93	110	24	91	4	4	1	1	0	0	1	0	0	0	0	0	153.55	1	23/3/2165 01:27:00	22/3/2165 22:15:00	166.01	1594.66	348.5	0	0	0	0	0	0	NA	8.78	0	0.9	3.6	20	18	0.3	NA	NA	15.5	1.4	29
10411160	32060994	29279148	62	1	1	106.5	NA	72	67	21	88	13	8	0	1	0	1	1	0	0	0	0	0	53.02	1	29/9/2162 12:53:00	29/9/2162 12:29:44	3315.17	687.27	800.96	1	190	0	0	1	8	671.47	18.14	0	4.9	2.4	14	25	0.3	NA	NA	11.7	1.1	30
10415643	36345516	26487500	79	2	1	76.3	155	95	99	15	95	10	5	0	0	0	1	1	0	0	0	0	0	169	1	12/3/2169 11:00:00	12/3/2169 06:10:34	4629.85	3839.8	32.86	1	10	0	0	1	8	224.74	16.38	0	1.4	3.1	351	376	1.3	NA	NA	16.4	1.5	29.2
10451487	38939399	27193816	92	2	1	68.05	152	99	68	29	82	8	7	1	0	0	1	1	0	0	0	0	0	121.82	1	4/10/2136 22:30:00	4/10/2136 22:07:16	-974.08	246.13	-677.07	1	60	0	0	1	60	NA	6.51	0	1.3	3.4	33	70	0.3	NA	NA	11.6	1.1	35.6
10471469	31395309	24537345	65	2	1	55.0667	165	119	95	27	92	6	3	0	0	0	0	0	0	0	0	0	0	134	1	13/5/2161 01:00:00	13/5/2161 00:55:35	7385.95	1972.44	-989.57	1	5	0	0	0	0	NA	16.73	0	1	3	17	25	0.5	NA	NA	NA	NA	NA
10554191	34976504	27497410	60	1	1	74	183	81	93	30	99	3	2	1	0	0	0	0	0	0	0	0	0	4.5	1	2/8/2178 08:00:00	2/8/2178 02:30:00	-1098.3	-39.67	-938	0	0	0	0	0	0	800.93	54.5	0	1	3.6	NA	NA	NA	NA	NA	13	1.1	20.8
10559489	35878021	24642800	78	1	2	91	183	138	72	27	91	8	8	0	0	0	0	1	0	0	0	0	0	281.7	1	11/2/2193 17:18:00	11/2/2193 16:42:58	870.56	1650.01	393.58	1	50	0	0	1	176	NA	66.09	0	1.6	2.5	75	52	0.7	NA	NA	14.3	1.3	25.5
10607049	34031990	26765748	55	1	2	98.5	NA	87	89	22	96	4	6	1	1	0	1	0	0	0	0	0	0	69	1	12/5/2128 22:00:00	12/5/2128 21:41:25	-277.1	-2209.42	1592	1	120	0	0	0	0	NA	4.7	0	1.2	NA	NA	NA	NA	NA	NA	10.2	0.9	24.8
10620406	34124022	23825454	74	2	2	72.65	165	93	87	14	100	11	6	1	0	0	0	0	0	0	0	0	0	144.73	1	23/12/2164 05:16:00	23/12/2164 04:55:08	9473.4	2074.69	546.88	0	0	0	0	1	8	22.82	17.44	1	0.5	1.8	8	16	0.7	NA	NA	18	1.7	150
10643827	30589359	29803052	75	2	2	65	163	98	71	18	98	6	5	0	0	0	0	0	0	1	0	0	0	173.43	1	14/4/2154 07:00:00	14/4/2154 06:08:00	1212.26	-1469.13	-815.67	1	10	0	0	1	132	NA	21.56	0	0.9	2.7	26	33	0.7	NA	NA	NA	NA	NA
10680821	36433413	23326088	65	1	1	53.6	185	105	126	22	98	4	10	0	0	0	1	0	0	0	0	0	0	118.9	1	25/4/2116 18:21:00	25/4/2116 18:06:47	2813.85	-6.84	519.04	0	0	0	0	0	0	7.48	8.4	1	0.6	3.4	14	32	0.3	NA	NA	35.4	3.7	34.9
10693162	39557479	26916941	54	1	1	100.5	NA	96	127	24	90	4	4	0	1	0	1	0	0	0	0	0	0	58.47	1	18/12/2114 17:00:00	18/12/2114 06:45:00	-2580	-2920	-3795	0	0	0	0	0	0	145.75	4.58	0	1	2.1	11	18	0.3	NA	NA	11.2	1	28.4
10698312	32959430	23826411	72	2	2	74.3667	NA	97	83	48	97	4	5	1	0	0	1	1	0	0	0	0	0	85.08	1	3/9/2171 16:25:00	3/9/2171 15:44:00	90	970	-45	1	120	0	0	0	0	NA	20.17	0	1.2	3.7	13	26	0.4	NA	NA	11.8	1.1	32.9
10705102	38450268	26175209	72	2	1	74.9	160	80	79	13	91	5	6	0	0	0	0	1	0	0	0	0	0	69.9	1	26/1/2160 17:06:00	26/1/2160 17:00:20	-1462.84	-550.91	550	1	179	0	0	0	0	NA	13.92	0	1.7	3.5	68	47	0.6	NA	NA	36.8	3.3	28.1
10708243	33967808	21431732	80	1	2	67	170	90	100	14	96	1	5	1	0	0	0	0	0	0	0	0	0	294.98	1	27/5/2129 22:46:00	27/5/2129 22:35:32	-1817.67	-2.1	-1116	1	10	0	0	0	0	NA	20.67	0	0.7	2.9	24	31	0.5	NA	NA	14.3	1.2	26.8
10717791	31311850	29221831	83	1	1	114	NA	68	63	15	97	6	11	0	1	0	1	1	0	0	0	0	0	39.83	1	1/3/2187 12:10:00	28/2/2187 10:54:30	103.39	-2620	25.63	0	0	0	0	0	0	793.55	15.34	0	3.1	2.9	18	58	0.7	NA	NA	12.2	1.1	52.9
10721598	36351554	29561037	82	2	1	79.55	150	88	68	16	100	11	10	0	1	0	1	0	0	0	0	0	0	97.53	1	18/1/2186 13:41:00	18/1/2186 11:05:49	4908.02	300.98	-1620.08	0	0	1	400	1	92	NA	9.27	0	1	NA	14	38	1.5	NA	NA	17.7	1.7	43.4
10734403	36647759	26588273	79	1	2	94.9	178	128	66	24	97	8	5	0	0	0	1	1	0	0	0	0	0	87.18	1	20/6/2110 23:00:00	20/6/2110 22:27:00	4764.05	2121.3	10	0	0	0	0	0	0	3.39	4.15	1	1	2.5	47	19	0.5	NA	NA	11.7	1	22.7
10763912	33388142	27844356	59	2	2	57.8	165	80	86	22	95	1	2	1	0	0	0	1	0	0	0	0	0	87.8	1	5/10/2128 12:00:00	5/10/2128 11:46:26	-283.26	1060	150	0	0	0	0	0	0	NA	6.22	0	1.3	3.1	17	23	0.2	NA	NA	11.5	1.1	20.3
10790116	39567041	25114987	62	1	2	112.8	183	99	80	19	90	6	7	1	0	0	1	0	1	0	0	0	0	204.5	1	11/8/2125 07:30:00	11/8/2125 05:40:00	-561.58	-1271.17	-1755	0	0	0	0	0	0	NA	11.51	0	1.2	NA	NA	NA	NA	NA	NA	NA	NA	NA
10809326	38588436	22350919	74	1	2	57.5	178	90	74	14	100	7	6	1	0	0	1	0	0	0	0	0	0	402.43	1	12/9/2115 16:04:00	12/9/2115 15:59:58	1245.62	-535.93	-380.47	1	160	0	0	1	10	NA	16.91	0	1.1	3.5	22	43	0.5	NA	NA	15.4	1.3	NA
10846671	30949248	25457731	78	1	1	77	173	72	71	20	100	9	7	0	0	0	1	1	0	0	0	0	0	518	1	19/7/2173 14:00:00	19/7/2173 13:05:18	5129.59	725	1073.5	1	130	0	0	1	248	31.21	31.5	1	2.5	2.2	107	153	0.6	NA	NA	13.8	1.2	31.3
10873966	33612559	27156000	66	1	1	95.3	178	79	88	12	100	8	5	1	0	0	0	0	0	0	0	0	0	74.5	1	25/5/2179 12:30:00	25/5/2179 10:59:32	3950.3	-1862.93	-2680	0	0	0	0	1	72	2051.7	7.25	0	0.8	NA	15	28	0.5	NA	NA	35.8	3.8	150
10882394	31408296	28669058	70	1	1	75.1	NA	102	109	26	95	2	11	1	0	0	0	0	0	0	0	0	0	145.33	1	18/4/2166 03:10:00	18/4/2166 00:16:20	713.75	710	-245	1	20	0	0	0	0	381.02	12.74	0	1	NA	19	25	0.5	NA	NA	18.7	1.7	31
10887901	32464457	28942534	70	1	2	58.8	178	100	58	24	100	4	4	0	0	0	1	1	0	0	0	0	0	140	1	26/9/2171 14:00:00	26/9/2171 13:42:00	6767.41	2722.34	-60.69	1	90	0	0	1	84	1394.49	33.11	0	0.9	2.7	356	76	0.6	NA	NA	12.5	1.2	56.9
10902267	37528363	27009709	70	1	1	74.4	173	104	86	16	97	7	10	0	0	0	0	0	0	0	0	0	0	156	1	12/3/2154 08:00:00	12/3/2154 07:14:04	807.52	-225.76	-1528.28	0	0	0	0	1	8	9.29	10.19	1	0.6	3.3	46	69	1.4	NA	NA	13.1	1.2	30.5
10904094	32283773	22904140	75	1	1	88.45	NA	63	68	25	88	7	13	0	0	0	1	1	0	0	0	0	0	62.87	1	30/12/2187 15:00:00	30/12/2187 13:26:55	-872	-2712.8	-3357.8	0	0	0	0	0	0	55.28	13	0	1.7	3.1	10	13	0.5	NA	NA	15.4	1.4	24.5
10907501	38587763	24724109	81	2	1	97.9	163	84	75	11	98	8	10	0	1	0	1	1	0	0	0	0	0	78.27	1	5/7/2185 06:44:00	5/7/2185 06:13:00	415.38	-270	60	1	80	0	0	0	0	348.78	8.49	0	2.4	NA	NA	NA	NA	NA	NA	11.8	1	28
10913472	36636407	29471574	61	2	1	68.8	NA	126	86	23	91	11	5	0	1	0	0	1	0	0	6	1	2/10/2114 23:00:00	14.45	1	10/10/2114 11:00:00	29/9/2114 21:33:38	9529.88	7126.04	1595.54	1	179	0	0	1	144	NA	20.8	0	2	1.4	25	46	0.7	NA	NA	14.5	1.3	32.1
10930151	35203271	23873957	86	2	1	67.6667	157	78	103	17	100	5	9	0	0	0	1	1	0	1	0	0	0	7	1	26/3/2147 13:00:00	21/3/2147 01:39:48	-235.8	-215	-1296.75	0	0	0	0	1	8	13.93	14.21	1	2.4	3.7	33	49	0.5	NA	NA	75.5	6.9	49.8
10967745	38139950	21458886	58	1	2	112.8	170	72	75	10	96	14	7	0	1	0	1	1	0	0	3	1	8/1/2187 21:00:00	161	1	8/1/2187 19:00:00	8/1/2187 18:49:07	1261.74	-4224.66	-6233.35	0	0	0	0	1	64	NA	14.81	0	2.3	2.8	2592	5880	1.1	NA	NA	31.2	2.9	150
11020519	39554293	29453938	74	2	1	59.15	160	113	81	19	99	10	10	1	0	0	0	0	0	0	0	0	0	313.5	1	24/3/2196 05:00:00	24/3/2196 04:23:10	1237.82	688.96	1537.29	0	0	0	0	1	68	15.35	15.9	1	0.6	3	29	32	1.2	NA	NA	14.1	1.3	33.9
11037736	34167023	22530120	54	2	2	77.1	NA	105	103	10	86	4	3	1	0	0	1	0	0	0	0	0	0	399.37	1	27/2/2186 09:00:00	26/2/2186 21:39:45	-1560	-1772.17	-1165	1	190	0	0	1	8	17.1	17.62	1	0.7	3	65	83	0.5	NA	NA	11.9	1.1	31.3
11057136	33291610	20849590	68	1	1	65	NA	124	108	36	95	6	5	1	0	0	1	0	0	0	0	0	0	57.8	1	3/7/2152 22:47:00	3/7/2152 22:16:48	-2193.21	-871.79	-316.78	1	10	0	0	0	0	12.1	12.9	1	0.8	NA	53	38	0.9	NA	NA	11.3	1	32.2
11065431	36529675	21554363	76	2	2	91.1	157	130	98	20	91	7	7	0	0	0	0	1	0	0	0	0	0	416.67	1	15/4/2181 11:20:00	15/4/2181 11:07:10	7404.5	6900.73	3827.7	0	0	0	0	1	16	18.08	18.48	1	1	1.7	12	15	1.7	NA	NA	15.8	1.4	27.8
11072500	37347241	26685185	69	1	1	94.05	170	86	95	20	94	2	6	1	1	0	1	0	0	0	0	0	0	323.67	1	3/12/2172 22:25:00	3/12/2172 19:45:20	-4977	-1695	-2930	1	210	0	0	0	0	NA	16.96	0	1.2	NA	NA	NA	NA	NA	NA	13.4	1.2	34.1
11132535	39485928	21336112	66	2	1	125.667	NA	97	107	22	97	11	9	0	1	0	1	1	0	0	0	0	0	76	1	5/11/2185 19:00:00	5/11/2185 17:40:00	-4267.16	-2279.98	-605.42	1	71	0	0	1	8	NA	10.09	0	2.4	NA	195	179	1.7	NA	NA	53.2	4.8	37.2
11148580	35817959	21509000	40	1	1	72.3	188	98	97	13	94	0	3	0	0	1	0	0	1	0	0	0	0	0	0	0	27/11/2125 01:17:22	210	-2235	-2830	1	10	0	0	0	0	2518.15	4.84	0	0.7	3.4	134	107	0.6	NA	NA	12.5	1.1	32
11155160	37151652	23169143	79	1	1	71.6	NA	90	112	20	98	2	7	1	0	0	0	0	0	0	0	0	0	4.08	1	17/10/2119 18:55:00	17/10/2119 18:13:00	-120	-140	-50	1	30	0	0	0	0	NA	7.9	0	0.6	NA	NA	NA	NA	NA	NA	NA	NA	NA
11156306	36436649	21752438	57	2	2	114.5	162	89	98	18	99	1	3	1	1	0	0	0	0	0	0	0	0	180	1	9/3/2151 00:00:00	8/3/2151 18:18:56	413.64	197.13	-834.58	1	10	0	0	0	0	NA	7.9	0	0.7	3.9	NA	NA	NA	NA	NA	12.7	1.1	23.4
11171196	36238664	21257020	76	1	1	92.85	173	75	91	28	100	9	6	1	0	0	0	0	0	0	0	0	0	111.1	1	14/9/2175 18:54:00	14/9/2175 18:49:00	1030.33	462.24	-181.6	0	0	0	0	1	18	NA	11.1	0	1.2	3.9	406	650	0.4	NA	NA	12.3	1.1	29.2
11186968	35350827	21206554	79	2	1	55.95	157	85	79	21	99	9	6	1	0	0	0	0	0	0	0	0	0	40	1	27/5/2163 20:00:00	27/5/2163 18:02:08	1299.06	-1727	-442.68	0	0	0	0	1	58	NA	23.89	0	0.9	2.3	15	19	0.5	NA	NA	15.4	1.4	30.5
11198895	33216968	28383961	82	2	1	52.05	NA	96	59	18	94	9	7	1	0	0	1	1	0	0	0	0	0	48.87	1	26/6/2178 02:54:00	25/6/2178 23:49:00	7651.59	1967.42	1251.37	0	0	0	0	1	144	4.07	4.59	1	1.2	2.4	53	280	2.1	NA	NA	16.4	1.5	34.6
11205160	35584460	29922914	79	1	1	98.35	168	87	82	12	84	2	10	0	0	0	1	0	0	0	0	0	0	68.48	1	22/3/2118 00:15:00	21/3/2118 22:15:09	-3340	155	-390	1	60	0	0	0	0	NA	9.74	0	1.5	NA	18	21	NA	NA	NA	22.8	2.1	29.6
11208503	38691951	22525122	85	2	2	55.1	NA	90	76	25	100	4	13	0	1	0	1	1	0	0	0	0	0	215.75	1	23/1/2196 15:15:00	16/1/2196 01:14:17	2966.37	-1247.24	6.2	0	0	0	0	1	0.5	22.36	22.47	1	1.6	2.7	26	24	0.2	NA	NA	11.4	1.1	25.4
11239929	32423297	21093544	73	1	1	77.3	180	67	83	16	99	10	4	1	0	0	0	0	0	1	0	0	0	36.58	1	30/7/2166 21:25:00	28/7/2166 19:21:00	3879.92	-160.36	-177.92	1	80	0	0	0	0	NA	9.75	0	0.8	3.1	39	56	0.6	NA	NA	10.2	0.9	22.4
11242982	39687651	22721642	59	2	1	89.3	160	81	67	17	90	12	5	0	1	0	1	1	0	0	0	0	0	863.57	1	26/1/2164 21:26:00	26/1/2164 21:05:47	1355.42	-1564.39	-2190.44	0	0	0	0	1	82	74.12	48.75	0	1.3	3	83	180	0.5	NA	NA	39	3.6	35.3
11246402	37375441	22850056	74	2	2	73.85	160	125	96	24	100	9	9	0	0	0	1	0	0	1	0	0	0	147.93	1	23/7/2152 08:04:00	23/7/2152 07:59:00	4135.31	-1208.38	-358.8	1	220	0	0	1	2	28.76	23.39	0	1.3	NA	85	121	0.4	NA	NA	11.4	1.1	27.7
11294007	37497005	28281599	83	1	1	60	NA	80	75	19	91	7	8	0	0	0	0	1	0	0	0	0	0	91.32	1	23/10/2118 09:21:00	23/10/2118 08:45:00	3280.91	1716.87	599.5	1	27	0	0	0	0	6.69	7.53	1	1.8	NA	NA	NA	NA	NA	NA	17.1	1.5	36.3
11295360	35444867	24551067	90	2	2	57	NA	65	77	16	100	8	9	0	1	0	1	1	0	0	0	0	0	66	1	21/3/2191 10:00:00	21/3/2191 09:25:00	-1120.39	-1044.5	60	0	0	0	0	0	0	NA	4.22	0	1.7	NA	NA	NA	NA	NA	NA	11.8	1	58.5
11336604	33807396	25474924	86	1	2	76.15	173	110	73	22	97	2	6	1	0	0	0	1	0	0	0	0	0	24	1	28/10/2115 18:00:00	28/10/2115 13:36:26	1465.75	450	-284.58	1	50	0	0	0	0	NA	11.25	0	1.1	NA	16	32	0.5	NA	NA	12.3	1.1	28.4
11353832	38396911	25246853	82	1	2	105	188	63	100	21	100	9	9	0	0	0	1	1	0	0	0	0	0	122.05	1	21/9/2169 23:00:00	21/9/2169 18:47:03	-1675.32	-2500.67	-2988.7	0	0	0	0	1	8	249.22	10.83	0	1.7	NA	22	27	0.9	NA	NA	12.8	1.2	25.1
11356760	35627717	24953463	61	1	2	59.15	NA	96	93	18	99	8	3	1	0	0	0	0	0	0	0	0	0	154.88	1	20/12/2179 01:07:00	19/12/2179 23:59:00	137	-592.22	-2229.11	1	10	0	0	0	0	30.03	12.7	0	0.7	NA	NA	NA	NA	NA	NA	NA	NA	NA
11361863	39571001	22117836	65	1	1	141.35	183	103	77	25	96	9	4	1	0	0	0	1	0	0	0	0	0	207.35	1	24/1/2158 11:00:00	21/1/2158 22:02:30	5810.69	772.64	631.41	1	20	0	0	1	90	NA	41.62	0	1.9	1.7	64	77	0.8	NA	NA	14.9	1.4	34.9
11362126	36974709	20839030	56	2	2	72	165	111	63	16	100	8	2	0	0	0	0	1	0	0	0	0	0	256	1	18/2/2139 23:00:00	18/2/2139 20:16:00	6360.81	2366.83	1512.53	0	0	0	0	1	78	NA	11.8	0	1.5	2.9	54	56	0.7	NA	NA	17.1	1.6	65
11367269	30272974	21916943	67	2	1	53.5	160	108	117	31	94	7	4	1	0	0	0	1	1	0	0	0	0	68.35	1	18/8/2153 11:39:00	17/8/2153 21:26:26	-257.77	-628.33	-308.91	0	0	0	0	1	8	NA	8.58	0	0.5	3.7	98	65	0.5	NA	NA	12.5	1.2	35.3
11374776	34927785	23440405	79	2	1	98.2	152	91	89	22	100	5	10	0	0	0	1	0	0	0	0	0	0	87	1	21/2/2188 00:00:00	20/2/2188 22:46:46	985	-2417.17	-1017.83	0	0	0	0	0	0	82.05	17.77	0	0.5	3.7	19	46	0.9	NA	NA	16.8	1.5	36
11381324	31494478	26637797	67	2	1	90.9	160	141	93	26	98	6	5	0	1	0	0	0	0	0	0	0	0	156	1	13/7/2142 02:00:00	12/7/2142 05:39:39	510.82	3314	-655.46	0	0	0	0	1	158	NA	23.25	0	0.2	3.3	21	11	NA	NA	NA	12.8	1.2	25.5
11395978	32361194	26094695	62	2	1	51	NA	98	99	19	98	7	9	1	0	0	0	0	0	0	0	0	0	81	1	29/2/2176 07:00:00	29/2/2176 03:53:01	1625	1755.92	-955	1	1	0	0	0	0	28.29	28.48	1	0.5	3.2	13	12	0.3	NA	NA	13.5	1.2	22.4
11410426	39722758	27299736	68	1	2	98.2	168	60	88	17	97	7	9	0	1	0	1	1	0	0	4	1	28/6/2115 17:00:00	109	1	25/6/2115 18:00:00	22/6/2115 02:19:00	1298	1934.34	-726.67	0	0	0	0	1	50	19	19.21	1	2.4	3.3	19	35	1	NA	NA	18.2	1.7	37.1
11411362	37331665	22523526	67	1	2	94.8	183	101	81	22	100	17	8	0	1	0	1	1	0	1	6	1	8/10/2121 13:58:00	186.77	1	8/10/2121 02:43:00	8/10/2121 02:24:00	10546.2	4817.64	2522.51	1	317.5	0	0	1	8	NA	18.52	0	2.2	2.7	4125	5872	1.9	NA	NA	73.4	6.5	40.6
11465141	30746476	21371029	71	2	2	45.1	155	104	76	17	95	7	10	0	0	0	0	1	0	0	0	0	0	116	1	14/3/2133 00:00:00	13/3/2133 20:47:00	5476.91	1812.16	540.51	1	100	0	0	1	70	4.22	4.22	1	0.9	2.3	33	37	0.4	NA	NA	14.9	1.4	150
11483762	33216452	25564243	66	1	2	78.3	NA	91	77	19	100	5	10	1	1	0	0	1	0	0	0	0	0	56.65	1	31/5/2170 05:12:00	31/5/2170 04:30:26	3695	2156	332.5	0	0	0	0	0	0	8.87	9.03	1	2.7	3.2	NA	NA	NA	NA	NA	NA	NA	NA
11508679	30062477	20568339	78	2	1	52.4	150	105	81	22	99	9	9	0	0	0	1	1	0	0	5	1	16/9/2149 18:00:00	287	1	13/9/2149 22:00:00	13/9/2149 21:56:12	1117.75	1302.84	784.56	0	0	1	400	1	8	NA	13.69	0	2.6	3.1	16	23	0.5	NA	NA	15	1.4	105.8
11525278	39612142	24502846	66	1	1	73.7	NA	100	88	26	97	2	10	1	0	0	0	0	0	1	0	0	0	155.77	1	11/7/2169 00:00:00	10/7/2169 19:52:10	1194	-371.45	186.45	1	95	0	0	0	0	80.17	15.87	0	0.6	3	39	21	0.5	NA	NA	14.2	1.2	38.2
11553398	34130907	27709520	77	2	2	89.5	160	75	131	39	98	5	5	1	0	0	1	0	0	0	0	0	0	24.47	1	6/1/2144 19:00:00	6/1/2144 01:34:11	622.39	-785	-485	1	40	0	0	0	0	NA	6.47	0	0.5	3.7	15	22	0.3	NA	NA	12.5	1.2	28
11554268	35633468	29761509	91	1	1	57.7	168	99	90	17	89	5	6	0	0	0	0	0	0	1	0	0	0	75.82	1	16/6/2165 07:00:00	15/6/2165 22:00:00	2168.66	38.15	289.08	1	80	0	0	0	0	NA	12.93	0	0.8	2.6	11	14	0.7	NA	NA	12.2	1.1	57.3
11581121	37864610	21253245	68	2	1	55.4	152	79	65	21	95	4	6	0	0	0	1	1	0	0	0	0	0	43	1	25/2/2179 00:00:00	23/2/2179 01:09:00	622.1	-1246.68	-1165.17	1	40	0	0	0	0	4.08	4.36	1	0.7	3.1	92	126	0.2	NA	NA	13.8	1.3	29.1
11594102	33957854	28380990	75	2	1	48	160	106	134	21	84	9	4	1	0	0	0	0	0	0	0	0	0	27.78	1	11/8/2175 16:00:00	7/8/2175 20:01:00	4482.49	-951.1	-724.99	1	170	0	0	1	8	9.22	9.23	1	0.4	NA	NA	NA	NA	NA	NA	16.7	1.6	37
11649157	31226646	25527621	68	1	2	151.875	188	75	95	16	100	4	5	1	1	0	0	0	0	0	0	0	0	382.23	1	6/10/2150 12:00:00	5/10/2150 02:00:11	3971.27	2114.35	-187.19	0	0	0	0	1	1218	NA	42.64	0	1.1	3.7	40	29	0.3	NA	NA	11.1	1	30.6
11655904	38016420	26830941	60	2	1	77.7	147	96	80	29	96	1	4	0	0	0	1	0	0	0	0	0	0	78.3	1	25/3/2169 09:00:00	24/3/2169 18:08:59	-663.13	-1936.39	-1450.51	0	0	0	0	0	0	NA	5.87	0	0.7	NA	NA	NA	NA	NA	NA	NA	NA	NA
11668452	30721263	21400255	77	1	1	96.5	180	63	64	22	95	5	8	1	1	0	1	1	1	0	2	1	19/7/2138 12:06:00	424	1	10/7/2138 00:00:00	9/7/2138 18:00:11	767	13.33	490	0	0	0	0	1	68	17.25	17.96	1	2.5	2.5	19	17	0.5	NA	NA	19.4	1.8	30.4
11731363	35757620	24706741	72	2	1	96.5	160	122	65	29	100	1	5	0	0	0	0	0	0	0	0	0	0	188.33	1	14/1/2162 19:30:00	14/1/2162 16:23:20	8775.32	2153.22	806.6	0	0	0	0	1	60	NA	13.05	0	0.6	2.6	60	35	1.7	NA	NA	14.6	1.3	26.5
11742505	37723752	24067631	72	2	2	87.25	178	94	85	31	94	6	6	0	1	0	1	0	0	0	0	0	0	136.02	1	5/5/2182 06:59:00	4/5/2182 11:38:53	-2112.92	-2541.68	-2115	1	40	0	0	0	0	8.16	9.07	1	0.7	NA	NA	NA	NA	NA	NA	11.7	1.1	30.3
11793183	34220394	26261796	58	2	1	61.8	155	103	82	25	95	15	5	1	0	0	0	1	1	0	0	0	0	75	1	13/12/2122 09:00:00	13/12/2122 03:41:21	970.44	-901.16	-854.25	0	0	0	0	1	8	11.67	12.29	1	0.8	3.7	47	128	24.5	NA	NA	24.7	2.3	42.4
11818101	34988733	24650524	53	1	2	96.65	178	71	78	27	95	6	3	1	0	0	1	1	0	0	0	0	0	205.9	1	12/9/2162 14:06:00	12/9/2162 13:26:48	957.98	1928.18	-1475.48	1	100	0	0	1	8	NA	18.53	0	1.2	3.7	17	19	0.8	NA	NA	30.1	2.7	36.9
11841526	39109886	23135831	78	1	1	88.2	168	72	59	15	99	5	7	0	0	0	0	1	0	0	0	0	0	108.83	1	28/10/2112 19:56:00	28/10/2112 14:01:38	1598.39	-671.03	-1584.17	0	0	0	0	1	72	NA	13.75	0	1	2.7	22	28	0.4	NA	NA	13.3	1.2	27.1
11845541	33211844	25617751	68	1	2	97.5	NA	63	86	12	100	10	13	0	1	0	1	1	0	0	0	0	0	60.5	1	9/10/2155 13:30:00	9/10/2155 13:08:43	-1688.83	-1722.55	-3059.5	1	80	0	0	0	0	247.02	7.63	0	5	NA	NA	NA	NA	NA	NA	14.4	1.3	42.3
11849767	33568977	28990261	55	1	2	92.3	165	110	73	16	100	7	2	1	0	0	0	0	0	0	0	0	0	239.17	1	29/7/2151 13:00:00	29/7/2151 12:19:24	6508.61	-82.2	-472.78	1	170	0	0	1	8	NA	20.24	0	1.1	NA	44	25	0.2	NA	NA	11.2	1	30
11863409	31580087	21905130	73	1	1	70	168	168	74	19	100	10	11	0	0	0	1	1	0	0	0	0	0	157	1	1/9/2125 22:00:00	1/9/2125 13:21:20	6806.06	47.83	-1781.17	1	104	0	0	1	556	6.44	6.99	1	1	2.6	13	18	1.1	NA	NA	12.7	1.2	29.8
11884069	31035628	29276109	52	2	1	53.45	NA	105	83	27	97	1	8	0	0	0	0	0	0	0	0	0	0	34.85	1	16/9/2136 20:09:00	15/9/2136 09:09:43	-1190	-390	-460.33	1	75	0	0	0	0	35.06	7.72	0	0.3	2.6	65	68	0.4	NA	NA	26.4	2.4	35.1
11895151	36147922	28452803	73	2	1	73.05	160	83	73	16	94	4	7	0	0	0	1	0	0	0	0	0	0	102	1	21/2/2181 00:00:00	20/2/2181 18:27:00	1663	2922.04	1752.92	1	15	0	0	1	60	NA	6.87	0	0.8	NA	NA	NA	NA	NA	NA	13.2	1.2	26
11897189	31622975	22552930	61	2	2	97	157	66	117	14	100	8	3	0	0	0	0	1	0	0	0	0	0	92.05	1	21/9/2158 04:00:00	21/9/2158 03:27:00	392.18	-224.27	134.06	0	0	0	0	1	16	NA	9.73	0	1.2	3.2	78	68	0.4	NA	NA	NA	NA	NA
11904758	39813875	24673183	63	1	2	85	183	89	70	8	100	3	5	1	1	0	0	0	0	1	0	0	0	75.32	1	15/4/2181 08:00:00	15/4/2181 05:05:23	339.38	1549.84	-6.94	0	0	0	0	0	0	NA	10.52	0	0.8	3.2	NA	NA	NA	NA	NA	12.9	1.1	22.1
11920643	38275869	29682520	67	2	1	113.7	163	75	132	18	95	5	6	1	0	0	0	0	0	0	0	0	0	62.5	1	8/7/2184 23:00:00	8/7/2184 22:35:40	2235.69	-190.72	-130	1	60	0	0	0	0	80.06	5.84	0	0.7	NA	18	17	0.3	NA	NA	10.5	1	26
11922884	35352413	23550831	69	2	1	72.9	157	77	69	22	99	5	9	0	0	0	1	1	0	0	0	0	0	9.75	1	1/4/2157 18:15:00	1/4/2157 18:00:02	-161.42	-1239.55	-940.92	0	0	0	0	0	0	17	15.75	1	2.4	3.4	81	83	0.5	NA	NA	15.2	1.4	31.9
11944391	31956658	23177670	69	1	1	88	178	80	85	26	91	4	6	0	0	0	0	1	0	1	0	0	0	141	1	8/11/2178 10:00:00	7/11/2178 20:19:00	-505	-3575	470	1	140	0	0	0	0	NA	9.81	0	1.8	NA	NA	NA	NA	NA	NA	12.3	1.1	27.4
11948471	37162762	24089481	84	1	2	59.1	170	122	130	33	96	3	8	0	0	0	0	1	0	0	0	0	0	115.87	1	30/6/2190 11:34:00	30/6/2190 11:01:00	682.84	-630	-994.33	1	492.5	0	0	1	144	72.6	38.12	0	0.7	2.1	84	84	0.9	NA	NA	15.6	1.4	30.4
11953959	33693238	24424895	63	2	1	NA	NA	99	91	19	98	1	3	1	0	0	0	0	0	0	0	0	0	96.12	1	7/9/2184 21:01:00	7/9/2184 20:15:00	-220	-370	-515	1	68	0	0	1	1	NA	14.91	0	1	NA	NA	NA	NA	NA	NA	10.7	1	22.7
11965661	34421887	27787151	58	1	2	69	168	92	105	25	100	5	8	0	0	0	0	1	0	0	0	0	0	333	1	2/5/2170 22:00:00	2/5/2170 21:45:00	4254.29	1240.1	-843.34	1	80	0	0	1	60	13.16	13.22	1	0.6	2.6	66	50	0.8	NA	NA	10.7	1	26
11989263	31272108	29644625	55	1	1	145	165	86	87	25	94	6	3	0	0	0	1	0	0	0	0	0	0	131.17	1	14/8/2178 14:50:00	14/8/2178 10:08:14	327.31	-2485.8	-2962.2	0	0	0	0	0	0	NA	15.1	0	0.9	NA	58	30	0.6	NA	NA	10.7	1	22.8
11990423	39220558	28358146	83	1	1	120.7	NA	79	60	17	97	6	9	0	0	0	1	1	0	0	0	0	0	64.25	1	18/8/2190 21:45:00	18/8/2190 18:57:15	1636.02	-810.46	-965	0	0	0	0	1	92	5.21	5.83	1	1.6	3.4	135	156	0.6	NA	NA	15.9	1.5	30.8
11993325	36089720	21469197	71	2	1	70.5	NA	58	96	18	89	1	8	0	1	0	1	0	0	0	0	0	0	85.75	1	21/5/2197 18:15:00	21/5/2197 15:42:00	475	-350	-540	1	220	0	0	0	0	25.43	10.04	1	1.1	NA	NA	NA	NA	NA	NA	NA	NA	NA
12019744	38294786	22874241	71	1	2	124	178	56	82	20	93	1	9	0	0	0	1	0	0	0	0	0	0	156	1	14/12/2186 00:00:00	13/12/2186 23:30:00	939.72	939.57	-380	0	0	0	0	1	216	17.07	17.8	1	0.9	NA	NA	NA	NA	NA	NA	16.9	1.5	31.4
12044498	31931761	27306294	72	1	1	84.4	183	69	102	18	95	1	6	0	1	0	0	0	0	0	0	0	0	107.83	1	2/10/2121 00:00:00	1/10/2121 23:01:25	-1935	-713	-515	1	10	0	0	0	0	NA	17.56	0	0.9	3.2	29	30	0.4	NA	NA	11	1	29
12051291	37667136	21697602	67	2	1	42.45	NA	63	78	24	89	6	11	1	0	0	1	0	0	0	0	0	0	125	1	27/9/2185 10:00:00	27/9/2185 06:03:00	1460.84	498.83	-116.99	0	0	0	0	1	60	20.78	10.64	1	0.8	3.1	11	14	0.2	NA	NA	10.3	1	23.7
12053896	30085094	22623077	64	2	1	150	140	101	76	18	97	3	4	0	0	0	1	0	0	0	0	0	0	117	1	14/3/2196 15:00:00	14/3/2196 13:45:16	-3863.33	-880	-1445	0	0	0	0	0	0	NA	8.01	0	0.9	3.6	12	23	0.8	NA	NA	14.2	1.2	25
12079400	32783746	22838546	63	1	1	65.8	183	95	70	21	98	6	4	0	0	0	1	0	0	0	0	0	0	60	1	5/6/2155 08:00:00	5/6/2155 04:27:03	-1320	-1368.71	-3075	1	30	0	0	0	0	NA	9.51	0	0.8	NA	NA	NA	NA	NA	NA	11.3	0.9	24.8
12092200	39840294	29720184	66	1	2	113.5	NA	86	71	20	90	12	4	1	1	0	0	1	0	1	0	0	0	59	1	17/11/2173 09:00:00	17/11/2173 08:25:00	2384.86	-3216.32	-3584.92	0	0	1	400	1	68	170.75	8.3	0	2.5	NA	34	34	2	NA	NA	12.2	1.1	32.1
12098619	37288057	22484747	60	1	2	172.6	191	105	80	20	93	8	7	1	1	0	1	0	0	0	0	0	0	88.95	1	18/4/2144 06:03:00	18/4/2144 05:47:00	-845	-2645	-3765	1	100	0	0	0	0	NA	11.35	0	1	2.8	NA	NA	NA	NA	NA	20.2	1.9	36.4
12133540	34200062	28203970	88	1	1	83.2	170	128	75	22	93	6	10	0	1	0	1	1	0	0	0	0	0	205	1	26/6/2122 23:00:00	26/6/2122 21:51:28	2372.32	-586.2	-1194.62	1	45	0	0	1	24	9	9.78	1	2.1	NA	85	92	0.8	NA	NA	21	1.9	39.2
12134776	32950984	20789943	70	1	1	91	NA	129	88	13	100	8	6	1	0	0	0	0	0	1	0	0	0	74	1	9/10/2112 18:00:00	9/10/2112 17:50:00	4156.84	1535.24	1067.68	0	0	0	0	1	68	NA	9.96	0	1	NA	33	26	0.4	NA	NA	13.8	1.2	20.7
12135369	38242652	24204652	54	2	2	68.2	NA	119	96	25	96	0	2	1	0	0	0	0	0	0	0	0	0	130.22	1	26/1/2174 01:47:00	26/1/2174 01:43:00	-1160.05	-470	-270	1	60	0	0	0	0	1889.02	5.68	0	0.6	NA	NA	NA	NA	NA	NA	13.7	1.3	28.3
12142332	30098344	23601345	69	2	1	75	NA	99	75	20	81	3	4	0	0	0	1	0	0	0	0	0	0	114.28	1	28/1/2150 13:00:00	28/1/2150 10:18:27	-60	-505	180.05	1	250	0	0	0	0	325.01	12.8	0	0.6	3.6	11	15	0.6	NA	NA	10.9	1	26.6
12176861	34739514	24306529	82	1	2	54.3667	165	84	75	22	90	9	10	0	0	0	1	1	0	0	0	0	0	49.77	1	3/2/2170 09:10:00	3/2/2170 09:08:12	211.51	-522.38	-768.14	1	210	0	0	0	0	16.62	11.34	1	3.3	2.7	185	155	0.8	NA	NA	12.9	1.2	150
12185789	34173187	26345157	64	1	1	89.2	185	82	93	16	100	9	4	0	0	0	0	0	0	0	0	0	0	31.27	1	23/4/2129 07:33:00	23/4/2129 03:48:00	-714.77	-1977.86	328	0	0	0	0	1	8	14.94	3.84	1	0.6	2.9	64	47	1	NA	NA	13.3	1.2	36.1
12242325	33014248	20694339	62	2	2	95	NA	101	90	21	99	1	4	0	0	0	0	0	1	0	0	0	0	137	1	30/9/2124 23:00:00	30/9/2124 21:12:15	125.58	-175	2310	1	80	0	0	0	0	19.22	5.99	1	0.9	2.4	62	16	0.8	NA	NA	14.1	1.3	25.2
12270337	34184496	28310424	57	2	2	56	163	91	113	35	91	6	3	1	0	0	0	0	0	1	0	0	0	73.03	1	2/7/2154 20:05:00	2/7/2154 17:06:51	1695.9	-687.66	-2125.23	0	0	0	0	0	0	NA	6.11	0	0.7	NA	NA	NA	NA	NA	NA	NA	NA	NA
12311245	34644775	27550963	74	1	1	68.45	157	68	73	21	95	3	4	1	0	0	0	0	0	0	0	0	0	82.57	1	25/12/2173 06:00:00	23/12/2173 15:41:01	3908.57	171.21	-2015.44	1	4	0	0	1	101	NA	14.1	0	0.9	3.2	15	12	0.2	NA	NA	11.5	1.1	26.1
12319770	37717879	27915548	71	2	2	154	152	92	65	22	97	9	7	0	1	0	1	1	0	0	0	0	0	344.58	1	6/12/2122 23:00:00	6/12/2122 18:55:03	6315.78	-178.25	-1010.69	1	215	0	0	1	1412	85.41	82.12	0	0.9	3.2	5	79	1.1	NA	NA	27.8	2.6	91.2
12365543	32573239	24961684	64	2	1	49	160	111	80	25	95	1	3	1	0	0	0	1	0	0	0	0	0	213	1	31/10/2159 17:00:00	31/10/2159 16:42:00	2553.5	303.76	-1453.62	1	65	0	0	0	0	NA	9.92	0	0.8	NA	NA	NA	NA	NA	NA	11	0.9	37.5
12376118	31871361	23882377	78	2	1	123.55	152	89	65	31	100	5	6	1	0	0	1	1	0	0	0	0	0	118	1	10/8/2133 22:00:00	10/8/2133 08:01:00	-3079.58	543.28	502.9	0	0	0	0	1	76	844.72	11.37	0	1.5	NA	NA	NA	NA	NA	NA	34.4	3.2	42.5
12382495	31358856	22763290	68	2	1	58.8	157	109	58	16	94	8	3	1	0	0	0	0	0	0	0	0	0	308.77	1	23/2/2136 15:00:00	16/2/2136 21:24:00	9043.31	1745.77	-10.94	1	60	0	0	1	17	NA	19.87	0	0.3	2.3	12	13	0.2	NA	NA	13.4	1.2	29.6
12388358	36961133	25326700	80	2	1	90.8	157	92	100	23	96	2	8	1	1	0	1	1	0	1	0	0	0	119.95	1	25/1/2153 08:03:00	25/1/2153 07:28:39	-1739.15	-1893.77	-1203.17	1	100	0	0	0	0	219.82	13.59	0	1	3.2	18	17	0.7	NA	NA	12.7	1.2	38.4
12389739	38913055	28561509	68	1	1	153.9	193	80	70	11	85	12	7	1	0	0	1	1	0	0	0	0	0	28	1	14/9/2143 12:00:00	11/9/2143 13:24:00	-1669.26	-1227.89	756.95	0	0	0	0	1	8	NA	9.06	0	4.2	NA	30	22	0.3	NA	NA	12	1	30.8
12406522	39626765	21370244	73	2	1	100	168	96	63	18	99	8	6	1	0	0	1	1	0	0	4	1	19/3/2144 18:00:00	618.75	1	4/3/2144 11:00:00	2/3/2144 21:11:00	2007.65	-1670	-798.65	0	0	0	0	1	60	202.17	31.85	0	1	2.6	10	15	0.3	NA	NA	9.8	0.9	37
12431260	38215773	25905915	69	1	1	89.1667	175	77	108	27	100	5	7	1	0	0	0	0	0	0	0	0	0	82.35	1	25/5/2172 17:39:00	25/5/2172 15:34:47	4424.81	-688.79	285.92	0	0	0	0	1	50	NA	7.55	0	1.4	NA	NA	NA	NA	NA	NA	11.8	1.1	31.6
12458963	37531341	25318500	88	1	1	64.6	160	82	51	16	100	4	6	1	0	0	1	0	0	0	0	0	0	14.67	1	25/6/2126 13:20:00	25/6/2126 13:15:36	3985	-724.72	-95	0	0	0	0	1	60	NA	16.83	0	0.6	NA	NA	NA	NA	NA	NA	12.7	1.2	30.4
12460244	33171333	21627054	50	2	2	69.6	NA	101	116	29	99	0	2	1	0	0	0	0	0	0	0	0	0	64.5	1	28/2/2178 08:24:00	28/2/2178 05:51:40	110	-1327.83	10	1	100	0	0	0	0	NA	5.47	0	0.6	NA	19	18	NA	NA	NA	10.6	1	33.2
12478513	31920220	29897922	58	2	2	50	163	93	75	18	100	12	9	0	0	0	0	0	0	0	0	0	0	107.33	1	21/10/2111 20:00:00	21/10/2111 18:22:01	1763.03	2842.88	1949.28	0	0	0	0	1	8	125.24	17.94	0	0.5	2.3	338	1670	0.3	NA	NA	19.9	1.8	25.6
12506247	31475923	21767034	74	1	1	114.033	NA	105	121	31	96	7	7	0	0	0	1	1	0	0	7	1	14/2/2121 15:00:00	608.85	1	7/2/2121 18:00:00	7/2/2121 16:59:48	-1679.53	-1781.52	-597.93	0	0	0	0	1	206	NA	57.63	0	0.8	2.6	37	104	0.4	NA	NA	11.9	1.1	41.3
12510288	30551860	27752135	84	2	1	59.4	157	104	73	25	89	4	13	1	0	0	0	1	0	0	0	0	0	446	1	28/12/2111 22:00:00	28/12/2111 15:28:01	2290.47	1187	837.7	1	70	0	0	0	0	100.36	19.9	0	0.4	3.1	53	62	0.3	NA	NA	13.6	1.2	22.5
12565265	36236219	27835588	67	1	2	89	NA	64	104	18	99	3	6	1	0	0	0	0	0	0	0	0	0	20.07	1	27/11/2178 20:21:00	27/11/2178 15:11:38	-28.33	1623.3	230	0	0	0	0	0	0	NA	24.78	0	0.7	NA	17	19	0.5	NA	NA	10.9	1	27.5
12588040	37319283	23173225	85	1	2	54.8	NA	90	71	15	94	5	7	0	1	0	1	1	0	0	0	0	0	44.18	1	31/5/2134 21:19:00	30/5/2134 20:29:00	1088.17	1136.42	300	1	120	0	0	1	8	NA	23.95	0	0.9	3.2	40	22	0.6	NA	NA	11.2	1	27.1
12598727	34204437	28376297	75	2	2	69.4	NA	60	116	9	100	3	8	0	0	0	1	1	0	0	0	0	0	197.25	1	19/4/2189 03:24:00	19/4/2189 02:00:00	2979.54	-303.93	-549.67	0	0	0	0	1	121.5	59.94	18.54	0	1.1	3	36	119	0.3	NA	NA	12.6	1.1	26.2
12630464	38808391	20456393	64	2	1	98.2	160	116	72	20	93	6	3	1	0	0	0	0	0	0	0	0	0	91	1	28/5/2112 04:00:00	28/5/2112 03:34:06	-617.06	-684.01	-2619.11	0	0	0	0	1	50	NA	10.66	0	0.6	NA	NA	NA	NA	NA	NA	12	1.1	25.9
12656773	37685433	29135073	56	2	2	107.55	152	112	108	10	98	7	5	1	0	0	0	1	1	0	0	0	0	280.47	1	28/9/2179 16:32:00	28/9/2179 16:20:17	515.67	-645.95	1097.01	1	1	0	0	1	8	NA	28.66	0	0.8	3.7	19	96	8.9	NA	NA	20.9	1.9	48
12662841	32176122	23402654	76	1	1	88	180	122	82	18	95	15	8	0	0	0	1	1	0	0	3	1	19/4/2127 20:00:00	81	1	16/4/2127 08:00:00	16/4/2127 06:53:00	2597.5	1254.07	859.32	1	200	0	0	1	496	4.8	5.54	1	3.8	NA	10	42	1	NA	NA	13.7	1.3	40.2
12669344	36513923	22971787	61	1	1	90	183	86	60	20	98	6	3	0	0	0	0	1	0	0	0	0	0	168	1	12/2/2146 16:00:00	12/2/2146 15:49:08	1943.34	-1381.5	-1039.2	1	100	0	0	1	60	NA	7.09	0	1.4	2.8	20	18	0.9	NA	NA	13.5	1.2	37.4
12678659	36547286	23586555	77	2	1	68.2	165	88	89	21	100	4	6	1	0	0	1	0	0	0	0	0	0	69	1	9/11/2116 19:00:00	9/11/2116 18:22:47	-1612.18	-738.75	-130	1	175	1	800	1	60	NA	8.8	0	0.9	3.5	165	68	0.2	NA	NA	16.5	1.5	51.1
12683611	37711117	29734598	76	2	1	50.7	155	110	61	24	93	1	6	1	0	0	1	0	0	0	0	0	0	313.63	1	12/12/2116 23:00:00	12/12/2116 14:23:00	-907.67	385	905.52	1	30	0	0	0	0	17.45	17.5	1	0.6	3.4	19	55	1.3	NA	NA	13.3	1.1	41.3
12705112	33771851	23877597	71	1	2	62.2	152	114	86	43	87	6	6	0	0	0	1	0	0	0	0	0	0	165	1	17/2/2151 11:00:00	16/2/2151 20:01:00	2499.61	745	-1747.69	0	0	0	0	0	0	NA	15.86	0	0.8	3.3	32	48	0.9	NA	NA	13.7	1.3	27.1
12746532	32911554	28922520	49	1	1	87	173	119	67	27	99	9	11	0	0	0	1	0	0	0	0	0	0	355	1	1/9/2177 17:00:00	1/9/2177 15:54:26	165.5	-825.75	-15.68	1	10	0	0	1	8	NA	19.93	0	1.6	3.5	33	153	0.8	NA	NA	13.7	1.2	30.3
12749913	31398658	25341666	85	2	1	53.5	160	116	78	21	95	5	6	1	0	0	0	0	0	0	0	0	0	226.2	1	27/8/2159 21:48:00	27/8/2159 21:15:01	-587.12	-611.38	-934.63	1	80	0	0	1	60	453.58	27.2	0	0.7	3	17	14	0.5	NA	NA	12.8	1.1	38.6
12765666	35407384	21610672	51	1	1	136.9	180	96	91	20	99	0	8	0	0	0	0	0	0	0	0	0	0	210.78	1	18/4/2129 21:13:00	18/4/2129 20:44:00	406.7	1078.13	1362.86	0	0	0	0	0	0	NA	9.91	0	0.8	NA	13	17	0.4	NA	NA	11.5	1.1	30.4
12772049	33400416	28165901	77	2	1	66	NA	107	94	22	98	2	5	0	0	0	1	0	0	1	0	0	0	49	1	26/11/2164 20:00:00	26/11/2164 16:50:55	-1668.79	-1582	-241.71	1	40	0	0	0	0	NA	6	0	0.8	NA	NA	NA	NA	NA	NA	16.3	1.5	36.4
12785009	37930196	24271594	62	2	1	70.3	163	106	72	23	94	9	3	1	0	0	0	0	0	0	0	0	0	134.8	1	28/8/2166 00:12:00	27/8/2166 23:56:00	912.88	1864.45	249.72	1	72	0	0	1	8	5.05	5.74	1	0.4	NA	56	77	0.9	NA	NA	12.5	1.2	28.4
12808803	31021231	28540703	76	1	2	80.65	163	117	93	34	97	3	5	1	1	0	0	1	0	0	0	0	0	490.9	1	21/6/2126 20:00:00	21/6/2126 18:41:46	1312.35	1836.13	-20.68	0	0	0	0	1	16	NA	44.85	0	1.7	2.4	23	13	0.5	NA	NA	17.1	1.6	29.4
12834788	38714211	24092508	64	1	2	146	180	116	88	19	96	4	4	1	0	0	1	0	0	0	0	0	0	134.5	1	22/5/2152 18:00:00	22/5/2152 17:55:15	6697.14	-847.54	-1275.61	0	0	0	0	0	0	NA	8	0	1	2.9	15	22	0.6	NA	NA	14.7	1.3	36.1
12837527	34288426	24711461	74	1	1	64	168	80	62	19	93	4	6	0	0	0	1	0	0	0	0	0	0	75.88	1	22/12/2149 04:14:00	22/12/2149 03:36:35	-262.3	15	-1925	0	0	0	0	1	8	NA	4.51	0	1.1	NA	NA	NA	NA	NA	NA	10.9	1	62.7
12841806	39765625	22238254	58	2	2	110	173	82	88	24	96	4	3	1	1	0	0	0	0	0	0	0	0	87.78	1	3/6/2183 09:00:00	3/6/2183 08:43:00	-372.5	578	-212.64	1	160	0	0	0	0	NA	14.45	0	0.6	NA	12	18	0.2	NA	NA	11.4	1.1	20.8
12843379	34970191	22930953	53	2	1	68.4	163	109	81	34	99	7	4	1	0	0	0	1	0	0	3	1	28/5/2143 23:00:00	168	1	24/5/2143 16:00:00	24/5/2143 14:55:00	6203.28	1048.28	1503.75	1	40	0	0	1	42	NA	17.12	0	2	3.2	3439	4477	1.3	NA	NA	16	1.5	30
12855113	39135241	22613876	87	2	2	60.7	163	92	76	19	95	7	6	1	0	0	0	0	0	0	0	0	0	102	1	7/10/2172 23:00:00	4/10/2172 17:13:00	6701.62	230.56	-719.77	1	100	0	0	1	76	NA	17.63	0	0.8	NA	17	28	NA	NA	NA	14.5	1.3	27.8
12860941	38151958	25544823	82	2	1	100	163	92	63	16	91	7	9	0	0	0	1	1	0	0	2	1	2/12/2135 17:00:00	34	1	1/12/2135 18:00:00	30/11/2135 05:12:45	1994.5	6005.67	5766.67	0	0	0	0	1	24	9.96	10.2	1	1.4	2.4	19	12	0.9	NA	NA	13.7	1.3	30.6
12864427	32795984	27132244	62	2	1	48.95	NA	117	87	26	100	4	3	0	0	0	0	0	0	0	0	0	0	163.7	1	15/9/2170 00:00:00	12/9/2170 08:14:26	-1310	-593.17	-298.35	0	0	0	0	0	0	486.32	16.99	0	0.7	NA	NA	NA	NA	NA	NA	16.4	1.5	72.3
12877713	31164400	20721453	82	1	1	75	168	101	64	26	99	6	9	0	0	0	1	1	0	0	0	0	0	73.7	1	18/8/2156 08:18:00	17/8/2156 09:09:00	379.8	199.67	1510	0	0	0	0	0	0	279.64	7.31	0	1.5	NA	NA	NA	NA	NA	NA	24.9	2.4	34.7
12883995	35652787	20671165	52	1	1	105	170	95	92	23	87	6	4	0	0	0	0	0	0	0	0	0	0	141	1	6/2/2113 11:00:00	6/2/2113 10:23:04	1795.19	-3334.95	1251.97	1	100	0	0	1	250	NA	11.63	0	0.9	NA	134	136	3.7	NA	NA	13.1	1.2	19.6
12907811	33772870	26534082	69	2	2	85	165	92	76	16	92	7	6	0	0	0	0	0	0	0	0	0	0	165.35	1	2/1/2137 22:53:00	2/1/2137 22:26:01	3546.84	891.49	2086.25	1	40	0	0	1	8	351.07	9.8	0	0.5	NA	NA	NA	NA	NA	NA	13.1	1.2	27
12927984	31799674	24281417	81	1	1	86.55	165	93	64	16	99	8	9	0	0	0	1	0	0	0	0	0	0	399	1	15/6/2183 16:00:00	15/6/2183 14:01:38	3931.99	-1818.12	-1988.98	0	0	0	0	1	73	NA	22.54	0	1.1	2.5	17	41	0.9	NA	NA	14.3	1.3	28.5
12934024	37217164	22994115	70	2	1	93	NA	113	75	27	92	9	4	1	0	0	0	1	0	0	0	0	0	136	1	24/2/2152 12:00:00	24/2/2152 11:40:00	14036.6	-3050	-1520	0	0	0	0	1	8	NA	10.29	0	1.3	NA	68	76	0.7	NA	NA	13.5	1.3	36.5
12945902	35490965	29086870	49	1	1	102.2	175	61	76	14	92	15	2	1	0	0	0	1	0	0	0	0	0	173.53	1	9/1/2122 08:00:00	9/1/2122 07:29:00	6184.54	-1758.52	336.86	1	90	1	400	1	32.5	13.72	9.45	1	2.8	2.5	2923	4259	2.7	NA	NA	16.9	1.5	35.2
12985528	39387163	22502095	80	2	1	118.8	NA	90	67	34	90	2	6	1	0	0	1	0	0	0	0	0	0	65.03	1	3/2/2139 23:30:00	3/2/2139 22:21:00	-1360	-168.79	-886.67	0	0	1	400	0	0	3.12	4.03	1	0.9	NA	NA	NA	NA	NA	NA	14.3	1.2	22.9
12988457	38827116	28550518	77	1	1	81.8	178	83	118	28	97	1	4	0	0	0	0	0	0	0	0	0	0	190.98	1	21/9/2149 20:01:00	21/9/2149 18:49:08	4157.88	2377.68	-1247.76	1	0.1	0	0	1	60	2366.22	18.03	0	0.6	2.3	21	38	0.9	NA	NA	15.7	1.4	31.3
12990140	34528818	29022270	54	1	1	82.4	178	109	69	27	100	3	12	0	0	1	1	1	0	0	0	0	0	273	1	23/4/2151 19:00:00	23/4/2151 13:16:29	-2245	2361.61	1399.43	1	10	0	0	1	76	12.27	13.02	1	0.8	2.8	15	23	0.7	NA	NA	15.1	1.3	32.7
12993105	38613506	29137554	59	1	1	119.4	183	113	74	18	97	19	6	1	0	0	0	1	0	0	18	1	18/3/2152 14:00:00	124.47	1	29/3/2152 14:00:00	18/3/2152 10:13:00	4323.85	6536.83	3502.31	1	50	0	0	1	74	NA	45.38	0	6.6	2.7	92	178	7.2	NA	NA	14.8	1.4	36.9
13029424	37389590	23886642	63	2	1	56	163	102	65	20	100	5	3	1	0	0	0	0	0	0	0	0	0	164.58	1	3/6/2153 03:51:00	3/6/2153 01:26:55	1824.5	-210	218.27	0	0	0	0	0	0	NA	7.6	0	0.4	NA	NA	NA	NA	NA	NA	12	1	27.8
13031833	33888235	28357467	76	1	2	89.5	174	90	75	26	98	1	5	0	0	0	1	1	0	0	4	1	30/12/2189 15:00:00	537.95	1	17/12/2189 23:20:00	16/12/2189 20:27:44	-1310	-76.37	157.44	1	80	0	0	1	74	NA	35.33	0	0.7	NA	56	86	0.7	NA	NA	13	1.2	27.9
13033327	39867250	21093920	49	2	1	71	163	116	96	18	92	4	5	1	1	0	1	0	0	0	0	0	0	900.17	1	5/1/2146 02:30:00	5/1/2146 01:10:31	119.8	3874.19	-1449.72	1	80	0	0	1	188	63.95	41.67	0	0.5	2.4	9	21	0.2	NA	NA	21.4	2	31.1
13046589	31414529	25702044	71	2	1	50	NA	125	97	38	95	1	4	1	0	0	0	0	0	0	0	0	0	77.37	1	28/7/2150 06:38:00	28/7/2150 06:00:00	-215	1101.25	2573.48	0	0	0	0	1	108	NA	13.63	0	0.6	3.1	NA	NA	NA	NA	NA	10.6	1	30.5
13048249	35448596	29687683	67	1	2	102.5	178	87	70	21	93	8	4	0	0	0	0	0	0	0	0	0	0	97.92	1	13/6/2163 16:00:00	13/6/2163 15:58:00	7432.8	697.95	-4003.75	1	80	0	0	0	0	NA	11.29	0	0.9	NA	NA	NA	NA	NA	NA	NA	NA	NA
13084641	34363894	20141895	64	2	1	56.6	150	91	80	17	100	7	4	1	0	0	0	0	0	1	0	0	0	69	1	5/6/2132 16:00:00	3/6/2132 03:01:00	1627.46	-924.87	-1329.64	1	160	0	0	1	8	NA	9.58	0	0.7	NA	49	49	0.1	NA	NA	13.3	1.2	150
13096912	30209929	20780403	69	1	1	86	NA	96	134	17	93	5	8	1	0	0	0	0	1	0	0	0	0	60.25	1	9/9/2151 20:45:00	9/9/2151 19:36:00	-3848.64	-1836.05	-2495	1	60	0	0	0	0	40.21	19.86	0	1.5	3.9	93	243	1.9	NA	NA	12.6	1.2	30.4
13107573	31793757	22359440	66	1	1	67.2	175	81	83	24	92	1	3	1	0	0	0	0	0	0	0	0	0	152.3	1	18/8/2117 09:00:00	17/8/2117 22:17:24	30	-1525	-1070	1	190	0	0	0	0	NA	15.86	0	0.8	NA	NA	NA	NA	NA	NA	10.9	1	25.7
13114575	30941081	24334208	49	1	1	106.4	180	74	72	15	100	8	4	1	1	0	1	0	0	0	0	0	0	94	1	16/3/2188 06:00:00	16/3/2188 05:56:00	1797.35	-851.74	2264.42	1	30	0	0	1	16	NA	9.18	0	1.1	3.6	6	8	0.5	NA	NA	13.7	1.2	32.8
13121870	35473613	27370800	71	1	1	53.3	NA	89	92	23	90	7	5	1	0	0	0	1	0	0	0	0	0	326	1	3/10/2171 22:00:00	3/10/2171 21:47:00	2067.37	215.33	-1315.51	1	105	0	0	1	68	57.66	16.74	0	0.8	2.4	102	160	0.5	NA	NA	11.9	1.1	37.6
13182835	30465888	26384774	77	1	1	141.45	175	90	62	0	95	9	6	1	0	0	0	1	0	0	13	1	15/7/2181 20:00:00	427.72	1	13/7/2181 11:32:00	13/7/2181 11:19:29	377.33	2304.78	3346.4	0	0	0	0	1	76	NA	39.82	0	1.8	3.4	113	220	10	NA	NA	18.1	1.7	38.7
13188974	31886903	23349499	69	1	1	58.7	183	114	70	39	100	3	4	0	0	0	0	0	0	0	0	0	0	61.82	1	14/9/2189 20:00:00	14/9/2189 10:36:00	-588.5	-34.17	175	1	140	0	0	0	0	4.59	4.3	1	0.5	2.3	15	21	0.2	NA	NA	11.8	1.1	29.8
13194772	37190742	20355495	74	2	1	73	163	92	72	18	89	0	6	0	0	0	0	0	0	0	0	0	0	109	1	17/8/2139 08:00:00	17/8/2139 04:22:25	-2790	215	-1800	0	0	0	0	0	0	NA	15.42	0	0.6	NA	16	22	0.3	NA	NA	13.1	1.2	25.5
13208026	38043664	20866231	62	2	1	80.7	157	102	86	21	97	6	5	1	1	0	0	0	0	0	0	0	0	69.03	1	26/1/2166 22:00:00	23/1/2166 02:11:00	3957.68	1800.93	-49.9	1	40	0	0	1	16.5	NA	26.57	0	0.8	3.4	21	33	0.7	NA	NA	11.4	1.1	117.4
13212165	31290668	29081263	61	1	1	117.6	NA	79	64	17	95	4	12	0	1	0	1	1	0	0	0	0	0	119.18	1	5/7/2175 10:49:00	5/7/2175 09:47:10	2411.5	-1002.01	-2375	1	40	0	0	0	0	40.23	17.81	0	1.5	3	22	30	0.5	NA	NA	11	1	24.7
13237459	36831809	24255453	75	1	1	54.2	180	116	90	22	100	13	5	1	0	0	0	1	1	0	0	0	0	113.45	1	26/3/2127 05:00:00	26/3/2127 04:17:51	3544.99	-209.37	-1600	0	0	0	0	1	8	5.82	5.97	1	1.4	2.9	724	588	2.2	NA	NA	21.3	1.9	39
13252596	36048142	28258580	66	1	1	76.2	173	81	99	21	97	3	6	1	1	0	0	1	0	0	0	0	0	31	1	9/4/2151 02:00:00	9/4/2151 01:11:43	362.14	-1286.56	-1742.46	0	0	0	0	1	100	300.31	10.81	0	0.8	1.9	6	8	0.2	NA	NA	14	1.3	30.6
13261828	38895226	27191862	75	1	2	50.1	NA	122	90	27	99	4	8	1	1	0	0	0	0	0	0	0	0	97	1	14/2/2115 11:00:00	14/2/2115 09:00:00	1631.83	-390	865	0	0	0	0	1	8	7.76	4.36	1	0.7	2.6	11	20	0.3	NA	NA	12.4	1.1	31.1
13263843	34662922	22385629	67	2	1	75.9	163	120	66	21	95	1	5	0	1	0	1	0	0	0	0	0	0	69.1	1	5/7/2195 01:20:00	5/7/2195 01:00:00	6407.16	555.67	1773.86	1	30	0	0	0	0	1151	6.7	0	0.4	NA	NA	NA	NA	NA	NA	13.5	1.2	26.3
13283178	34188473	26706273	85	1	1	71.4	NA	83	74	25	92	11	7	0	0	0	0	1	0	0	0	0	0	87.15	1	5/3/2127 20:32:00	5/3/2127 19:06:00	-117.8	-778.58	-1129.57	1	170	0	0	1	8	717.23	9.97	0	1.2	NA	NA	NA	NA	NA	NA	12.7	1.2	32.2
13294123	32231620	20493284	64	1	1	73.2	NA	83	69	21	93	2	5	0	0	0	0	0	0	0	0	0	0	134	1	17/8/2139 19:00:00	17/8/2139 18:47:32	5771.17	1448	-455	0	0	0	0	0	0	1726.53	6.97	0	0.6	3	59	85	0.9	NA	NA	13.9	1.3	35.5
13312240	39570212	21544536	75	1	1	80.95	179	52	64	16	96	2	9	0	0	0	1	1	0	0	0	0	0	93.5	1	29/10/2126 11:00:00	29/10/2126 10:18:53	2306	97.55	1984.7	1	90	0	0	1	120	69.11	46.94	0	1.2	3	424	357	0.8	NA	NA	12.5	1.2	27.8
13320757	39258865	28078517	49	2	1	163	NA	107	68	28	96	4	3	1	1	0	1	1	0	0	0	0	0	71.48	1	9/4/2118 02:31:00	9/4/2118 02:07:00	702.53	-2316	-2657.92	0	0	0	0	0	0	1887.96	3.78	0	1.3	NA	63	45	0.3	NA	NA	NA	NA	25.3
13332177	36675020	24236982	83	2	1	74.7	160	102	56	19	94	3	8	1	0	0	1	0	0	1	0	0	0	17	1	17/5/2181 23:00:00	16/5/2181 00:04:00	3906.83	-947	-1722	1	30	0	0	0	0	NA	3.73	0	0.5	NA	17	24	0.2	NA	NA	12.9	1	26
13333021	39074292	26875217	74	2	1	70	163	87	83	23	95	4	7	1	0	0	1	0	0	1	0	0	0	99.5	1	20/4/2174 09:00:00	20/4/2174 08:59:39	499.68	-69.54	-572	1	100	0	0	0	0	NA	8.82	0	1.1	3.6	NA	NA	NA	NA	NA	11.1	1	NA
13334004	37679272	24190449	58	1	1	61.7	178	86	69	13	100	9	7	1	0	0	0	0	1	1	0	0	0	201.55	1	29/4/2182 02:15:00	29/4/2182 01:51:00	-2439.29	-286.25	-672.45	0	0	0	0	1	120	68.96	12.56	0	0.7	2.4	93	204	2.1	NA	NA	15.3	1.3	35.2
13339751	36027000	20810248	81	2	1	50.6	157	116	83	22	96	5	5	1	0	0	0	0	0	0	0	0	0	89.73	1	27/12/2173 19:30:00	27/12/2173 19:05:35	-902.42	28.33	-16.33	1	40	0	0	1	60	NA	7.63	0	0.7	NA	NA	NA	NA	NA	NA	23.6	2.2	33.6
13357548	38732272	27232722	71	2	1	80.65	NA	80	60	19	96	7	6	0	0	0	1	1	0	0	0	0	0	107	1	21/12/2189 00:00:00	20/12/2189 23:09:55	1222.16	-300.53	163.6	0	0	0	0	1	16	4.04	4.61	1	2.1	NA	16	26	0.2	NA	NA	12.9	1.2	23.9
13360726	37357204	28298898	59	2	2	67.2	157	86	59	7	100	8	3	0	1	0	0	1	0	0	0	0	0	292	1	16/8/2143 15:00:00	16/8/2143 14:34:16	335.71	-1091.28	-1452.67	0	0	0	0	1	16	NA	23.21	0	0.9	2.5	24	27	0.4	NA	NA	15.1	1.4	51.2
13382552	38444495	23701942	88	2	1	41.9	160	90	81	31	100	9	11	0	1	0	1	1	0	1	0	0	0	208	1	4/11/2174 20:00:00	4/11/2174 18:38:00	-1351.71	731.9	400.37	1	80	0	0	1	8	8.3	9.09	1	1.3	2.9	91	152	0.5	NA	NA	22.5	2.1	46.1
13390728	31004416	26350081	58	2	1	153	175	58	62	15	97	5	4	0	1	0	1	1	0	0	10	1	15/2/2120 21:22:00	258.92	1	6/2/2120 21:39:00	6/2/2120 20:55:28	328.38	-1529.44	-399.53	0	0	0	0	1	128	NA	53.96	0	0.7	4.2	92	63	0.6	NA	NA	10.8	1	26.1
13429426	37777433	25562906	66	1	1	103.4	NA	77	77	18	100	9	5	1	0	0	0	0	0	0	0	0	0	36.52	1	22/11/2161 12:00:00	21/11/2161 01:01:00	-387.17	-679.73	-1485	1	60	0	0	1	8	NA	6.74	0	1	NA	7	14	0.3	NA	NA	15.6	1.4	34
13429528	39250359	28318547	83	2	2	54	155	155	69	18	99	7	8	0	0	0	1	1	0	0	0	0	0	261.92	1	25/5/2154 15:00:00	25/5/2154 14:19:40	5385.1	1048.3	-2472.08	0	0	0	0	1	60	NA	20.2	0	0.7	2.3	21	42	0.7	NA	NA	16.6	1.5	34
13446842	35055830	25843446	69	1	1	68.45	NA	122	70	14	100	2	5	0	0	0	1	1	0	0	0	0	0	86.18	1	8/6/2172 15:47:00	8/6/2172 14:49:40	2450.06	-1238.58	-2295.9	1	40	0	0	1	60	2330.44	18.14	0	1.1	NA	169	108	0.3	NA	NA	17.8	1.6	27.3
13457864	39754656	21321991	58	2	2	93.55	170	68	86	14	100	13	3	0	0	0	1	1	0	0	0	0	0	90.5	1	22/2/2173 14:00:00	22/2/2173 12:59:50	2436.78	-1505.8	-1224.17	0	0	0	0	1	82	NA	24.69	0	1.2	3.6	23	109	2.9	NA	NA	17.2	1.6	29.8
13462752	31031015	29775724	73	1	1	84.3	NA	106	93	24	93	0	6	0	0	0	1	0	0	0	0	0	0	86.82	1	28/1/2183 08:12:00	28/1/2183 08:01:36	-400.33	-1480	520	0	0	0	0	0	0	NA	9.27	0	1	NA	62	262	0.4	NA	NA	12.3	1.1	61.8
13537559	33755900	21066640	52	1	2	109	178	118	107	13	95	4	6	0	0	0	1	1	0	0	3	1	21/2/2117 11:00:00	145.7	1	16/2/2117 00:00:00	15/2/2117 21:02:00	311.87	1225	2427.5	0	0	0	0	1	16	7.23	8	1	1.1	2.2	22	77	10.4	NA	NA	17.5	1.6	60.4
13558006	33753459	28092806	83	1	1	97.6	NA	67	89	15	99	6	7	1	0	0	0	0	0	0	0	0	0	206	1	30/9/2157 01:00:00	29/9/2157 23:54:00	945.61	525.08	2032.5	1	25	0	0	1	60	8.06	8.94	1	0.9	NA	NA	NA	2.3	NA	NA	22.3	2.1	35.2
13568398	39621094	23919625	74	1	1	46.1	NA	124	104	26	88	3	10	0	0	0	0	0	0	0	0	0	0	61	1	9/12/2188 13:00:00	9/12/2188 03:56:03	2867.15	650	-175	1	30	0	0	1	60	11.94	12.32	1	0.5	NA	NA	NA	NA	NA	NA	NA	NA	NA
13570759	30932864	21849461	64	2	1	97.45	NA	120	101	22	94	5	4	1	0	0	1	0	0	0	0	0	0	96	1	1/9/2115 12:00:00	1/9/2115 10:45:05	-2156.25	-2065	-765	1	340	0	0	0	0	NA	12.93	0	0.6	NA	NA	NA	NA	NA	NA	NA	NA	27.9
13598803	32612189	25950935	65	2	1	51.3	157	90	74	20	89	8	3	0	0	0	0	1	0	0	0	0	0	274.92	1	19/1/2127 03:08:00	19/1/2127 02:16:00	1057.67	1779.38	856.77	1	40	0	0	0	0	NA	15.65	0	4.2	3.3	71	144	0.3	NA	NA	13.6	1.3	28.1
13609416	37009694	26526079	81	1	2	74.5	NA	90	57	17	91	6	8	0	0	0	1	1	0	0	0	0	0	317.5	1	22/8/2188 15:00:00	22/8/2188 13:38:12	391.7	1590.08	-340.33	0	0	0	0	0	0	17.07	17.66	1	0.8	NA	76	29	0.4	NA	NA	12.4	1.1	27.5
13610225	33922331	29859439	70	1	2	65.1	163	121	113	22	100	3	6	0	1	0	0	0	0	0	0	0	0	165	1	19/7/2134 00:00:00	18/7/2134 20:13:27	-603.38	-986.14	-820	1	10	0	0	1	851.5	NA	28.91	0	0.9	NA	40	29	NA	NA	NA	12.6	1.2	31.2
13641933	30891404	28263289	77	1	1	55.5	170	94	66	25	91	3	9	1	0	0	1	0	0	1	0	0	0	132.92	1	5/9/2161 19:05:00	5/9/2161 18:30:40	-2672.09	1071.5	-900.72	0	0	0	0	0	0	15.23	5.91	1	0.7	3.6	25	164	1.4	NA	NA	11.4	1.1	69.2
13699693	32934873	20137371	81	1	1	70.2	178	63	54	36	100	13	9	0	1	0	1	1	0	0	5	1	4/1/2156 21:00:00	151	1	3/1/2156 21:00:00	3/1/2156 20:45:32	7741.65	2426.28	1641.42	0	0	1	400	1	68	NA	15.35	0	3.7	3	90	155	0.9	NA	NA	35.5	3.3	97.7
13718304	37406251	26996303	92	2	2	82.5667	155	94	70	23	98	3	10	0	1	0	1	1	0	0	0	0	0	153.02	1	7/4/2143 22:55:00	7/4/2143 17:11:39	-1193.89	253.55	1045	1	108	1	400	0	0	17.41	14.17	1	1.7	3.7	19	24	0.3	NA	NA	11.4	1.1	27.9
13721591	39343677	20342223	65	2	1	111.3	163	79	78	22	97	5	4	1	1	0	0	0	0	0	0	0	0	106.5	1	14/2/2110 21:30:00	14/2/2110 21:28:57	742.48	226.3	-1825.99	1	60	0	0	1	60	NA	13.11	0	0.5	NA	NA	NA	NA	NA	NA	13.9	1.3	28.1
13729279	39470047	24054987	71	1	1	120.9	178	103	112	20	92	6	7	1	1	0	0	0	0	0	0	0	0	118	1	13/1/2181 23:00:00	13/1/2181 20:08:31	3803	2394.76	-1187.63	0	0	0	0	0	0	152.16	18.85	0	1	NA	NA	NA	NA	NA	NA	13.4	1.2	27.1
13744011	37121433	23517785	85	1	1	74	174	62	100	19	100	2	5	1	0	0	0	0	0	1	0	0	0	73.97	1	28/3/2130 09:33:00	28/3/2130 09:25:00	-586.83	488.77	254	1	40	0	0	0	0	NA	11.34	0	1.2	3.5	50	43	0.5	NA	NA	14.7	1.3	27.5
13757309	32008816	25638903	92	1	2	62.9	NA	69	93	17	100	11	12	0	0	0	0	0	0	0	0	0	0	52.75	1	14/7/2123 19:47:00	14/7/2123 18:13:52	1063.46	1371.89	1011.64	0	0	0	0	1	150.5	NA	25.05	0	1.2	3.5	11	25	0.5	NA	NA	12.2	1.1	43.8
13800187	32741781	25311968	91	1	1	89	165	76	90	21	92	8	8	0	0	0	1	0	0	0	0	0	0	16.98	1	15/4/2149 17:00:00	15/4/2149 16:40:11	945.43	65.52	-1535	0	0	0	0	1	58	NA	16.85	0	0.7	NA	NA	NA	NA	NA	NA	14.7	1.4	25.9
13815060	32356165	21306695	68	1	1	73.15	175	78	101	9	100	4	12	0	0	0	1	0	0	1	0	0	0	294.15	1	1/3/2168 20:00:00	1/3/2168 15:31:06	2776.26	100.76	115	0	0	0	0	1	72	168.25	20.88	0	3.1	3	9	51	0.2	NA	NA	14.8	1.3	31.7
13816871	30524622	21999692	55	1	2	52	NA	85	40	17	99	10	11	0	0	0	0	1	1	0	0	0	0	0	0	0	22/2/2177 16:35:22	803.58	-260	128	0	0	0	0	0	0	30.12	13.81	0	1.5	2	5	96	26.2	NA	NA	28.2	2.6	112.9
13830055	36351522	26450636	85	1	1	79.05	175	83	103	19	97	7	10	0	0	0	1	1	0	0	0	0	0	140	1	4/2/2116 19:00:00	4/2/2116 11:04:06	2267.64	1343.8	1646.3	1	30	0	0	0	0	319.54	19.3	0	1.1	2.8	25	13	0.3	NA	NA	10.7	1	24.6
13831349	30424774	21397648	77	2	2	118.3	NA	82	90	23	92	8	7	0	0	0	1	0	0	0	0	0	0	86.55	1	2/5/2128 00:27:00	2/5/2128 00:12:00	5529.12	-3479.23	-1423.73	1	100	0	0	0	0	569.02	7.72	0	1.5	NA	49	39	0.3	NA	NA	16.5	1.5	36.5
13877180	31715891	22598759	56	1	1	160.1	191	89	83	37	95	4	3	1	0	0	0	0	0	0	0	0	0	99	1	8/6/2166 00:00:00	7/6/2166 17:06:49	1419.28	1049.3	-1058.97	1	12	0	0	1	8	NA	15.97	0	0.7	3.6	22	36	1.4	NA	NA	13.8	1.3	30.7
13882979	34416288	24584329	80	2	1	52.6	NA	102	77	21	92	1	6	1	0	0	0	0	0	0	0	0	0	129.83	1	16/1/2139 21:47:00	16/1/2139 20:18:23	-327.67	-1550	-1304.83	1	35	0	0	0	0	13.34	7.07	1	0.4	2.8	23	30	0.1	NA	NA	12.2	1	20.4
13890112	38516282	26125478	87	1	2	65	178	84	94	30	95	6	13	1	0	0	1	1	0	0	0	0	0	78.1	1	11/3/2189 17:57:00	11/3/2189 14:05:56	-2610	-1472.74	-1059.83	0	0	0	0	0	0	15.98	10.68	1	2.5	NA	NA	NA	NA	NA	NA	15.1	1.3	34.8
13902474	31810329	21569738	78	2	1	103.5	163	80	77	9	100	7	9	0	0	0	1	1	0	0	0	0	0	386.9	1	29/10/2115 12:13:00	29/10/2115 08:21:55	5405.27	-2673.74	-3589.8	0	0	0	0	1	316	74	39.52	0	0.9	3.9	19	16	0.7	NA	NA	14.8	1.4	32.8
13935134	33711564	21712098	84	1	1	70	183	92	85	20	98	8	11	0	1	0	0	1	1	0	0	0	0	26	1	11/4/2176 12:00:00	10/4/2176 18:22:45	673	130	-11.17	0	0	0	0	0	0	22.2	22.21	1	2.2	1.3	9	14	0.2	NA	NA	16.8	1.5	33.4
13959611	30147796	24332648	52	2	2	53.2	NA	77	90	24	100	3	4	0	1	0	1	0	0	0	0	0	0	133.7	1	17/4/2133 22:18:00	17/4/2133 22:05:00	3348.84	1412.13	52.02	1	270	0	0	1	8	140.14	5.82	0	0.5	NA	7	13	0.2	NA	NA	12.9	1.2	34.1
13960491	35820370	26285102	72	2	2	90	170	62	78	19	88	11	6	1	1	0	1	0	0	0	0	0	0	100	1	21/8/2117 18:00:00	21/8/2117 16:21:06	-1793.34	-1457.01	-2268	1	50	1	800	0	0	NA	10.86	0	1.3	3.6	120	99	1.5	NA	NA	16.3	1.5	129.8
13966837	37167515	26398383	80	2	1	54.5	155	81	68	24	97	5	5	1	0	0	0	0	0	0	0	0	0	127.45	1	17/5/2129 10:33:00	17/5/2129 09:54:00	3439.42	1439.62	1468.03	1	65	0	0	0	0	880.65	24.26	0	0.7	3.5	NA	NA	NA	NA	NA	NA	NA	NA
13974348	33562905	20711081	76	2	1	84.5	165	75	76	21	91	3	6	1	0	0	0	0	0	1	0	0	0	208.25	1	15/5/2178 18:45:00	15/5/2178 18:35:00	1123.73	762.41	770.84	1	10	0	0	1	120	23.26	23.73	1	0.6	3	20	25	0.3	NA	NA	13.5	1.2	25.3
13983896	37527364	21689790	92	1	1	81.5667	NA	60	89	16	100	4	6	1	0	0	0	0	0	0	0	0	0	204	1	17/10/2164 08:00:00	17/10/2164 07:48:00	4713.73	3138.99	615.31	1	10	0	0	0	0	72.77	10.35	0	0.9	NA	NA	NA	NA	NA	NA	26.3	2.5	44
13993692	30756971	22445284	73	1	2	93.2	NA	109	117	25	96	2	8	1	0	0	1	1	0	0	0	0	0	173	1	24/9/2117 15:00:00	24/9/2117 13:01:41	-460	-775	-1830	1	10	0	0	0	0	22.46	13.22	1	1.9	3.3	12	18	0.4	NA	NA	14.6	1.3	37.5
14004638	36699108	22463381	64	2	2	108.1	NA	88	97	18	100	6	4	1	1	0	0	1	0	0	0	0	0	70	1	8/2/2151 16:00:00	8/2/2151 15:58:00	6004.27	-620.42	-1827.08	0	0	0	0	0	0	3265.37	19.06	0	2.3	2.9	18	22	0.6	NA	NA	13.5	1.1	28.2
14015628	38901213	20257383	82	1	1	49.9	NA	86	93	31	99	4	7	1	0	0	1	0	0	0	0	0	0	93.63	1	24/11/2142 14:00:00	24/11/2142 12:27:00	-391.42	70	1036.75	1	60	0	0	0	0	6.52	6.92	1	0.7	NA	NA	NA	NA	NA	NA	13.4	1.2	35.4
14029699	39110350	21629146	68	2	1	97.2	150	115	93	16	92	4	6	0	0	0	1	1	0	0	0	0	0	166.17	1	29/12/2142 12:00:00	29/12/2142 11:58:07	-50	-575	-190.42	1	30	0	0	1	8.5	NA	30.86	0	0.6	2.8	13	17	0.2	NA	NA	14.2	1.3	26.7
14033551	33864717	25429490	90	1	1	104.2	NA	56	102	14	93	6	10	0	1	0	1	1	0	0	0	0	0	92.5	1	9/1/2154 14:30:00	9/1/2154 12:51:44	-963.78	-690	590	0	0	0	0	0	0	11.46	7.07	1	4	3.7	106	173	0.4	NA	NA	16.2	1.5	23.1
14034200	39346565	20063894	76	2	1	121.8	NA	87	64	21	96	9	4	1	0	0	0	1	0	0	0	0	0	155.7	1	2/6/2180 22:47:00	2/6/2180 22:40:57	6027.65	3350.45	1091.62	0	0	0	0	1	24	9.06	9.97	1	2.6	NA	NA	NA	NA	NA	NA	15.2	1.4	26.2
14096379	36330266	20891243	74	1	1	118	188	129	54	14	96	13	5	1	0	0	1	1	0	0	5	1	2/8/2150 19:00:00	219.3	1	1/8/2150 02:00:00	31/7/2150 23:41:36	8443.95	2915.52	2461.4	0	0	0	0	1	76	NA	21.8	0	5.2	2.5	69	73	3.1	NA	NA	21.7	2	43.6
14119391	38358199	20390224	67	2	2	42.3667	157	137	83	22	96	3	4	0	0	0	0	0	0	0	1	1	11/1/2165 12:00:00	64	1	12/1/2165 00:00:00	10/1/2165 20:20:00	2048.96	140.04	-511.29	1	210	0	0	0	0	NA	7.82	0	0.6	NA	NA	NA	NA	NA	NA	11.7	1.1	32.3
14128850	31609228	29453195	92	2	2	71	NA	94	57	20	93	8	12	0	1	0	1	1	0	0	0	0	0	52	1	13/10/2181 21:00:00	13/10/2181 20:54:00	2670.14	969.58	1130	0	0	0	0	1	216	10.23	10.48	1	1.1	2.1	11	27	0.2	NA	NA	15.5	1.4	28.5
14149319	32575725	25903017	55	1	1	92.8	185	98	88	30	97	9	3	0	0	0	0	1	1	0	0	0	0	62.62	1	1/6/2164 17:23:00	1/6/2164 17:02:09	2207.02	-1308.06	168.41	0	0	0	0	0	0	346.33	7.01	0	1.3	3.6	260	447	4.6	NA	NA	14.9	1.3	30.4
14186815	35013706	20879199	84	2	1	58.6	NA	121	112	26	99	4	6	1	0	0	0	0	0	0	0	0	0	125.5	1	3/6/2164 03:00:00	3/6/2164 02:28:09	-1478.15	-477.67	-980	0	0	0	0	0	0	131.38	14	0	0.7	NA	28	24	0.3	NA	NA	24.2	2.3	34.1
14219090	39788202	20508856	78	1	2	117	180	76	100	13	100	5	7	1	0	0	0	1	0	0	0	0	0	0	0	0	27/3/2122 15:46:00	3581.11	890.1	223.81	0	0	0	0	1	100	3.35	3.35	1	1.4	NA	NA	NA	NA	NA	NA	17.5	1.6	27.1
14239129	30545486	24218277	61	2	2	60	157	99	77	23	96	12	10	0	0	0	0	0	0	0	0	0	0	57	1	14/7/2117 02:00:00	14/7/2117 01:26:00	3166.11	-221.53	-720	1	2	0	0	1	16	10.99	11.43	1	0.6	2.5	34	16	0.3	NA	NA	13.1	1.2	25.1
14244279	35112452	22866121	82	1	2	51.8	NA	93	86	21	96	14	13	0	0	0	1	1	1	0	0	0	0	22.97	1	31/1/2151 15:00:00	31/1/2151 14:27:43	710.69	-2773.41	-2753	1	6	0	0	1	66	14.4	14.75	1	8.6	2.9	34	67	0.5	NA	NA	13.3	1.2	38.1
14258316	37596925	24471591	72	1	1	67	163	94	71	25	97	3	8	1	0	0	1	0	0	0	0	0	0	93.75	1	10/2/2137 14:15:00	10/2/2137 12:34:51	2514.83	-1516.97	844.57	1	85	0	0	0	0	NA	12.27	0	1.8	NA	NA	NA	NA	NA	NA	12.6	1.1	26.3
14266489	38464084	26077929	71	2	1	123.35	163	96	74	19	88	2	8	0	1	0	0	0	0	0	0	0	0	79.13	1	31/5/2142 00:52:00	31/5/2142 00:16:00	2832.8	-953.13	-1275.36	0	0	0	0	1	58	743.03	12.66	0	1.5	NA	NA	NA	NA	NA	NA	24.3	2.2	33.7
14269536	37069183	25530842	58	2	2	76.2	165	97	93	29	100	5	4	1	1	0	1	0	0	0	0	0	0	111.52	1	27/5/2177 18:00:00	27/5/2177 17:49:00	-3029.2	-2801.7	-1871.91	1	110	0	0	0	0	NA	18.97	0	0.5	3.4	25	30	0.6	NA	NA	14.4	1.3	46.9
14274285	32271402	26811912	71	1	1	48.4	NA	94	85	14	100	6	7	0	0	0	1	0	0	0	0	0	0	102.22	1	5/5/2180 11:00:00	5/5/2180 10:48:22	-514.9	-10.24	-758.08	1	12	0	0	1	8	NA	27.15	0	0.6	3	114	275	0.3	NA	NA	10.9	1	25.1
14280430	37668531	25963302	79	2	1	86	152	111	89	14	100	5	4	1	0	0	0	1	0	0	0	0	0	242	1	10/4/2145 18:00:00	10/4/2145 17:37:08	13636.4	5505.08	298.18	1	100	0	0	1	128	NA	19.85	0	1.2	2.7	16	29	7.1	NA	NA	16.8	1.6	36
14282911	37386550	27859509	77	2	1	50.5	162.56	80	77	30	100	3	10	1	0	0	1	1	0	0	0	0	0	29.03	1	27/8/2147 02:58:00	26/8/2147 23:50:22	4284.41	1988.3	644.05	1	40	0	0	1	8	820.02	22.74	0	0.8	2.2	52	55	0.5	NA	NA	16.8	1.5	28.6
14343596	31835563	29902816	52	2	2	173.5	168	77	107	23	99	4	4	0	0	0	1	0	0	0	0	0	0	78	1	27/7/2114 05:00:00	27/7/2114 03:44:46	-1449.05	-3744.08	-25	0	0	0	0	0	0	360.85	22.7	0	0.9	3.2	35	18	0.7	NA	NA	13.3	1.2	27.9
14346010	33954197	25906890	82	1	1	70	175	99	106	14	90	7	7	0	0	0	1	1	0	0	0	0	0	58.62	1	10/1/2136 22:04:00	10/1/2136 13:21:26	810.32	570	300	1	10	0	0	0	0	9.2	9.71	1	1.4	NA	NA	NA	NA	NA	NA	31.2	2.9	24.7
14350791	31231258	28199410	79	1	2	72.5	163	124	79	25	95	2	12	1	1	0	0	1	0	0	0	0	0	84.42	1	10/5/2141 22:35:00	10/5/2141 16:04:10	2455	130	2099.26	1	100	0	0	1	8	4.97	5.6	1	1.1	3.1	17	61	0.4	NA	NA	11.2	1	30.2
14377211	38569978	23412904	88	1	2	74.4	163	84	97	20	100	5	10	0	1	0	1	1	0	0	0	0	0	71.5	1	12/8/2179 08:30:00	11/8/2179 18:42:27	1017.53	-1620.23	60	1	40	0	0	1	69	15.22	11	1	1.9	3.1	NA	NA	0.4	NA	NA	12	1.1	28
14395025	38507044	23642094	85	1	2	56.7	168	96	68	20	98	6	5	1	0	0	0	0	0	0	0	0	0	235.97	1	7/6/2130 20:02:00	7/6/2130 19:42:00	6377.05	-747.24	-2212.93	1	40	0	0	1	60	149.28	10.09	0	1.1	NA	NA	NA	NA	NA	NA	10.8	1	32
14395214	35906377	29970322	58	1	2	58.3	168	54	81	14	100	6	5	0	1	0	1	0	0	0	0	0	0	56	1	15/6/2130 01:00:00	15/6/2130 00:56:00	414.61	-274.69	-433.33	1	100	0	0	1	16	NA	10.66	0	0.9	2.4	39	34	0.5	NA	NA	12.4	1.1	26.9
14398954	35191653	25210164	80	1	1	106.2	NA	104	74	25	99	7	13	0	1	0	0	1	0	0	0	0	0	72	1	15/8/2172 20:00:00	15/8/2172 15:20:00	35.57	-2564.16	-352.76	0	0	0	0	1	128	329.51	7.18	0	2.5	2.7	47	144	0.3	NA	NA	12.3	1.1	62
14418220	35450632	20428190	68	1	1	111.9	NA	87	78	14	100	12	6	0	0	0	1	1	0	0	0	0	0	157.73	1	16/7/2138 23:16:00	16/7/2138 15:02:32	7408.65	-1189.7	-450.29	1	425	0	0	1	348	11.13	11.45	1	1.2	2.9	84	491	1.8	NA	NA	16.1	1.5	25.9
14420062	31993492	29902868	61	2	1	105.8	165	87	100	21	100	4	5	1	0	0	1	0	0	0	0	0	0	119.83	1	15/10/2151 16:10:00	15/10/2151 15:53:19	-536.41	-875.71	-1761.83	0	0	0	0	1	0.5	NA	9.19	0	0.7	NA	NA	NA	NA	NA	NA	13.5	1.2	29.8
14433684	34377844	22063211	81	2	1	77.8	NA	99	70	27	98	2	14	0	0	0	1	1	0	0	0	0	0	92	1	20/2/2172 08:00:00	20/2/2172 05:13:46	-450	-1967.6	-1380.2	1	20	0	0	0	0	11.31	11.79	1	0.5	2.5	12	27	0.3	NA	NA	21.9	2	26.9
14435287	32414871	28695600	88	2	1	58.75	157	98	80	16	96	3	7	1	0	0	1	0	0	1	0	0	0	118.78	1	28/10/2187 17:54:00	28/10/2187 17:06:00	2894.47	2268.77	-1397.28	0	0	0	0	0	0	34.37	9.14	0	0.5	3.2	10	18	1.3	NA	NA	20	1.8	35.1
14440691	38002369	22290855	96	2	2	51.2	NA	85	107	21	96	3	8	0	1	0	0	0	0	0	0	0	0	0	0	0	30/3/2137 10:11:00	1662.24	2423	390	0	0	0	0	0	0	93.67	4.26	0	0.7	NA	NA	NA	NA	NA	NA	NA	NA	NA
14451605	32795641	25686058	82	2	1	72	163	115	74	22	97	7	8	1	1	0	1	1	0	0	0	0	0	0	0	0	11/11/2162 22:22:11	2414.16	2162	1162.24	0	0	0	0	1	16	12.07	12.49	1	0.7	3.3	30	41	0.3	NA	NA	62.9	6.3	40.9
14458343	30101771	25022945	76	1	1	85	NA	71	129	21	100	6	14	0	0	0	0	1	0	0	0	0	0	205.17	1	28/8/2147 12:00:00	28/8/2147 08:44:31	-2232.99	-238.35	-128.46	0	0	0	0	0	0	16.1	14.96	1	2.1	3.1	34	27	0.4	NA	NA	14.5	1.3	48.6
14480975	33568135	27414700	42	1	2	96	178	74	70	16	98	7	6	0	0	0	1	0	0	0	0	0	0	115	1	3/9/2119 18:00:00	3/9/2119 17:35:00	2582.35	4635.92	2650.25	0	0	0	0	1	82	NA	12.85	0	0.9	3.1	80	106	0.4	NA	NA	11.7	1.1	25.7
14481936	39816989	28898910	87	1	1	77.1	157	70	61	20	90	9	9	0	0	0	1	1	0	1	0	0	0	63	1	25/3/2179 09:00:00	25/3/2179 08:58:15	1046.72	2233.05	-763.24	1	30	0	0	1	68	NA	11.92	0	2.2	1.8	30	14	0.5	NA	NA	12.8	1.2	28.5
14483818	39714771	22059767	59	1	1	147.7	185	85	75	21	97	6	3	0	0	0	1	0	0	0	0	0	0	126.8	1	4/6/2151 14:00:00	4/6/2151 11:40:04	-484.54	888.36	-2206.89	1	66	0	0	1	58	496.01	23.76	0	0.5	2.9	11	10	0.4	NA	NA	12.9	1.2	29.3
14505633	30272018	25497394	71	1	2	100	163	98	98	14	91	7	8	0	1	0	1	1	0	0	0	0	0	58	1	13/7/2138 00:00:00	12/7/2138 18:38:00	1693	-1587.03	-531.06	0	0	0	0	1	8	786.29	4.08	0	1.1	NA	36	17	0.3	NA	NA	11.7	1.1	34
14512319	35973113	22045996	75	1	1	59.7	NA	132	62	13	100	5	5	0	0	0	1	1	0	0	0	0	0	84.6	1	1/11/2123 22:00:00	1/11/2123 21:55:40	269.67	1989.17	1090.83	1	70	0	0	0	0	818.5	6.2	0	1.4	NA	NA	NA	NA	NA	NA	24.5	2.3	38.8
14513953	31830836	26059718	81	2	1	97.5	155	104	71	31	100	6	10	0	1	0	1	1	0	0	3	1	11/12/2177 23:00:00	82	1	10/12/2177 13:00:00	10/12/2177 06:26:28	928.55	2218.71	8068.93	1	100	0	0	1	274	9	9.05	1	2.3	NA	282	1075	3.4	NA	NA	16.1	1.5	29.5
14556995	30731664	26465173	71	2	2	92.2	NA	74	72	24	93	2	6	0	0	0	1	0	0	0	0	0	0	133	1	26/2/2115 04:00:00	25/2/2115 22:24:42	650	-835	-905	1	140	0	0	1	5	NA	19.73	0	1	NA	NA	NA	NA	NA	NA	12.7	1.2	24.6
14568046	32237593	24221039	78	2	1	154	NA	80	61	27	98	4	5	0	0	0	1	1	0	0	0	0	0	0	0	0	23/7/2162 12:28:14	1662.69	912.21	3889.55	1	245	0	0	1	632	30.48	31.45	0	0.7	2.8	31	46	0.2	NA	NA	12.5	1.1	32.7
14592578	39827923	20844181	90	2	2	42.5	NA	130	71	24	96	1	7	0	0	0	0	1	0	0	0	0	0	79.88	1	22/11/2178 12:07:00	22/11/2178 11:09:51	-30	950	-345	0	0	0	0	0	0	NA	9.37	0	0.7	NA	NA	NA	NA	NA	NA	12.2	1.1	38.2
14644835	30687382	27389782	73	2	2	75.5	160	75	77	29	95	4	6	0	0	0	0	0	0	0	0	0	0	70.5	1	18/5/2160 21:30:00	18/5/2160 21:17:27	-1762.1	2150.06	-106.5	1	240	0	0	0	0	55.11	11.86	0	0.5	3.4	24	21	0.3	NA	NA	11.7	1.1	22.8
14677796	33140628	24989222	86	2	1	61	NA	85	97	26	96	2	12	0	0	0	1	1	0	1	0	0	0	225.93	1	24/6/2189 02:00:00	24/6/2189 01:18:00	-844.25	-840	-530	0	0	0	0	1	50	18	18.26	1	1.1	3.9	NA	89	0.5	NA	NA	12.4	1.1	25.7
14684009	39341253	27549947	69	2	1	86.5	NA	102	54	23	95	5	7	1	1	0	1	0	0	0	0	0	0	68.52	1	27/8/2148 14:15:00	27/8/2148 08:53:28	766.27	145.25	-1642	0	0	0	0	1	60	1867.41	15.16	0	0.7	NA	NA	NA	NA	NA	NA	12.3	1.1	31.2
14693474	33551044	20735285	50	2	1	50.7667	NA	102	95	24	100	4	1	0	0	0	0	0	0	0	0	0	0	49.03	1	10/8/2189 18:00:00	8/8/2189 02:12:56	-1057.54	-1292.63	-1552.73	1	80	0	0	0	0	219.91	5.59	0	0.4	4.4	30	13	0.2	NA	NA	9.8	0.9	37.2
14701621	33410913	25880089	50	1	1	53.6	170	128	124	10	100	6	8	0	0	0	0	0	0	0	0	0	0	108.37	1	24/2/2149 07:30:00	24/2/2149 07:23:06	5110.36	42.12	6.41	1	15	0	0	0	0	NA	9.74	0	0.6	3.8	NA	NA	0.2	NA	NA	11.9	1.1	30.1
14710894	36279534	22891803	81	1	1	66	NA	98	108	29	98	2	13	1	0	0	0	0	0	0	0	0	0	88.38	1	11/11/2147 19:37:00	11/11/2147 18:34:00	811.09	300	-183	1	10	0	0	0	0	43.27	6.05	0	0.9	NA	150	41	0.3	NA	NA	17.8	1.6	27.1
14719928	35742876	29200471	75	2	2	117.067	160	86	100	20	100	8	7	0	1	0	1	1	0	0	0	0	0	80.17	1	11/9/2189 03:50:00	11/9/2189 03:41:21	-550.06	1329.59	-3589.01	1	40	0	0	1	8	NA	8.88	0	1.7	2.9	122	185	0.9	NA	NA	12.2	1.1	28.8
14733129	38613993	26654216	85	2	1	59.5333	NA	122	71	34	94	3	10	1	0	0	1	1	0	0	0	0	0	95.6	1	1/11/2137 20:00:00	1/11/2137 19:52:05	1095.8	182.98	-431.54	0	0	0	0	0	0	13.48	8.08	1	2.6	NA	28	32	0.3	NA	NA	11.9	1.1	24.3
14776370	39616856	24035622	66	2	2	107.8	173	75	71	17	93	8	8	0	1	0	0	0	0	0	0	0	0	79.58	1	13/6/2188 23:25:00	13/6/2188 22:34:00	381.2	-256.86	-43.5	0	0	0	0	1	8	4.23	4.97	1	1.9	NA	NA	NA	NA	NA	NA	11.5	1.1	33
14805440	37845585	22400263	86	2	1	46.2	NA	91	67	20	96	4	8	0	0	0	1	0	0	0	0	0	0	206.85	1	5/1/2186 17:00:00	5/1/2186 09:06:00	-191.92	20.65	-141.12	1	100	0	0	1	180	10.69	11.17	1	0.7	NA	NA	NA	NA	NA	NA	11.5	1.1	33.1
14813021	31187694	28126941	63	2	1	164	165	98	61	21	95	11	4	1	1	0	0	1	0	0	2	1	3/11/2154 00:01:00	0	0	0	1/11/2154 21:32:44	4138.61	2083.3	715.1	0	0	0	0	1	8	NA	16.71	0	7.5	3	66	51	0.5	NA	NA	13.8	1.2	24.2
14842197	34895584	26016930	81	2	2	66	160	110	98	26	96	6	6	0	0	0	1	1	0	0	0	0	0	4	1	15/1/2135 20:00:00	1/1/2135 00:03:41	2423.3	784.67	198.31	1	90	0	0	1	60	15	15.68	1	0.8	NA	57	53	0.4	NA	NA	28	2.6	37.6
14842402	38172121	24982716	73	2	2	68.65	157	133	81	14	100	9	7	0	0	0	1	1	0	0	0	0	0	116.52	1	17/2/2127 15:29:00	17/2/2127 15:24:00	4359.68	-1327.06	-1790	1	785	0	0	1	8	NA	5.09	0	1.9	NA	NA	NA	0.1	NA	NA	11.4	1	120.5
14867461	35575456	23312304	67	2	2	87.3	170	99	99	19	96	4	7	0	1	0	1	1	0	0	0	0	0	79.6	1	31/3/2149 18:22:00	31/3/2149 18:02:37	-1048	1115	-780	1	10	0	0	0	0	142.23	13.04	0	1.1	3.5	23	21	0.2	NA	NA	13.2	1.2	25.1
14872672	38976285	29294271	72	2	2	88.6	178	80	59	16	100	13	10	0	1	0	1	0	0	0	1	1	29/11/2154 11:02:00	141.17	1	25/11/2154 17:50:00	25/11/2154 12:01:47	7032.09	916.06	786.64	0	0	0	0	1	474	138	20.75	0	3.3	NA	21	27	0.5	NA	NA	20	1.8	23.5
14889167	33333978	23759212	84	1	2	67.4667	168	68	102	14	99	10	9	0	0	0	1	0	0	0	0	0	0	167.78	1	22/2/2139 18:35:00	22/2/2139 18:34:01	340.99	1537.32	1235.31	0	0	0	0	1	8	11.23	9.9	1	2.3	2.9	147	179	3	NA	NA	12.8	1.2	33.2
14893843	35958104	29919551	60	2	2	110.833	157	85	85	20	99	10	5	0	0	0	0	1	0	0	8	1	1/1/2162 21:00:00	0	0	0	1/1/2162 16:50:42	4433.44	4373.44	4008.98	1	12	0	0	1	24	6.3	6.88	1	4	2.4	6	15	NA	NA	NA	10.2	0.9	100.6
14903739	36382410	24950713	88	2	2	41.6	152	78	53	23	99	4	7	1	1	0	0	0	0	0	0	0	0	147.32	1	25/7/2166 00:00:00	24/7/2166 22:16:00	1072.8	1029	711.71	1	210	0	0	0	0	NA	22.87	0	0.7	3.9	18	23	0.2	NA	NA	11.2	1	28.5
14908132	30403576	28548819	80	1	1	92	165	113	74	24	95	6	14	0	1	0	0	1	0	0	0	0	0	164.18	1	14/1/2156 15:00:00	14/1/2156 14:41:33	-2721.96	-2743.61	-825.76	0	0	0	0	0	0	222.35	18.05	0	2.9	2.8	NA	NA	NA	NA	NA	16	1.5	27.4
14908858	38701189	26602586	81	1	2	72.9	178	87	85	19	99	7	7	0	1	0	1	1	0	0	0	0	0	10	1	5/1/2139 17:00:00	3/1/2139 02:20:07	641.38	223.87	-2409.14	1	150	0	0	1	28	16.9	17.35	1	0.3	2.3	10	10	0.2	NA	NA	15.6	1.4	22
14928862	35059523	24038585	77	1	1	94.45	NA	96	69	20	97	10	8	0	1	0	0	1	0	0	0	0	0	120	1	13/12/2177 12:00:00	13/12/2177 11:36:06	981.92	688.72	695.06	0	0	0	0	0	0	4.52	5.32	1	2	NA	26	68	0.5	NA	NA	14.9	1.3	52.8
14951133	35305163	25916072	67	2	1	89.3	157	56	80	18	96	4	5	0	1	0	1	0	0	0	0	0	0	577.8	1	24/5/2179 00:00:00	23/5/2179 22:58:14	484.2	74.7	-381.1	1	130	0	0	1	68	1270.04	26.73	0	0.9	3	27	26	0.4	NA	NA	12.4	1	24.9
14968694	35596297	29492750	81	1	2	51.4	NA	89	75	30	100	2	5	1	0	0	0	0	0	0	0	0	0	79.07	1	20/8/2182 09:11:00	20/8/2182 08:37:00	1025.51	1295.56	-26.33	0	0	0	0	0	0	3.72	3.84	1	1	NA	14	41	1.4	NA	NA	NA	NA	NA
14986625	33617022	29693431	66	1	1	80	173	92	79	16	98	1	5	1	0	0	1	0	0	0	0	0	0	68.88	1	1/5/2186 18:03:00	1/5/2186 16:19:04	-1369.57	1923.64	175	1	90	0	0	0	0	466.32	6.09	0	1	3.7	NA	NA	NA	NA	NA	13.1	1.1	26.6
14995394	32298785	23744597	97	1	1	72.2	NA	115	107	32	89	4	6	0	0	0	1	0	0	0	0	0	0	174.17	1	1/3/2146 15:00:00	1/3/2146 08:42:22	-800	1535	1175	1	140	0	0	1	1	120.98	16.75	0	0.9	2.1	NA	NA	0.7	NA	NA	15.9	1.5	26.5
14995538	32891514	24371044	73	2	2	93	152	93	137	36	99	7	10	0	1	0	1	1	0	0	0	0	0	70	1	12/6/2155 12:00:00	12/6/2155 09:47:20	-888.17	1434.64	-3182.33	1	40	0	0	0	0	148.11	28.79	0	2	2.5	37	44	0.2	NA	NA	13.8	1.3	19.6
15003327	32446193	27245455	68	1	1	68.75	163	71	65	14	97	9	6	1	0	0	1	0	0	0	0	0	0	64	1	20/6/2175 16:00:00	20/6/2175 12:29:30	1276.93	-1931.32	-2886.37	0	0	0	0	1	474	NA	20.88	0	0.8	3.3	37	45	1.6	NA	NA	15.6	1.4	25.4
15007699	35043244	23433523	63	1	2	60.2	NA	141	138	29	96	3	5	0	0	0	1	0	0	0	0	0	0	45.35	1	15/12/2130 17:39:00	15/12/2130 09:06:00	-1683.03	-505	-405	1	100	0	0	0	0	NA	6.27	0	0.6	NA	29	32	0.6	NA	NA	12.6	1.2	53.4
15031111	37624914	27917559	71	1	2	84	NA	109	104	18	92	2	11	0	1	0	1	1	0	0	0	0	0	77	1	29/12/2152 00:00:00	28/12/2152 23:20:00	-1935	716.81	969.9	1	60	0	0	1	76	41.1	41.97	0	0.5	3.7	36	21	0.7	NA	NA	16.2	1.5	27.2
15084163	35885717	28678783	51	2	1	138	170	101	93	22	94	6	4	0	0	0	1	0	0	0	0	0	0	82.5	1	4/3/2168 14:20:00	4/3/2168 08:51:46	-4675	516	-3100	1	10	0	0	0	0	4997.75	8.5	0	0.6	NA	NA	NA	NA	NA	NA	12.1	1	23.4
15112941	30809760	24239138	76	1	2	84.8	178	55	39	14	98	6	9	0	0	0	1	1	0	0	0	0	0	172.87	1	15/7/2119 20:00:00	15/7/2119 01:35:00	3319.93	1296.52	141.21	1	4	1	400	1	68	27.14	15.86	1	2.1	2.5	23	27	0.4	NA	NA	13.4	1.1	31.1
15126931	32214650	24355439	74	1	1	118.7	183	65	62	13	100	7	6	0	0	0	0	1	0	0	0	0	0	111	1	24/4/2114 12:00:00	24/4/2114 09:55:56	8847.44	-1016.21	-2105	0	0	0	0	1	72	115.7	9.39	0	2	3.2	4	26	0.4	NA	NA	17.1	1.5	38.5
15140113	30050950	23125645	64	2	2	137.6	160	77	97	27	94	1	5	0	1	0	1	0	0	0	0	0	0	52.83	1	23/8/2132 14:00:00	23/8/2132 08:13:14	-420	-90	-1180	1	12	0	0	0	0	NA	10.39	0	1	3.5	11	18	0.4	NA	NA	13.3	1.2	30.4
15146755	35436925	20961377	72	2	1	132.5	157	88	62	21	93	13	10	0	1	0	1	1	0	0	0	0	0	183.5	1	15/1/2160 15:47:00	8/1/2160 17:04:12	-2859.97	876.77	-2118.99	1	10	0	0	1	16.5	74.29	16.82	0	1.6	2.9	9	17	0.3	NA	NA	11.2	1	27.6
15155821	32378737	29951783	64	2	2	53.2	155	102	96	17	97	7	6	0	0	0	1	1	0	1	0	0	0	41.32	1	24/1/2181 00:00:00	22/1/2181 00:09:32	-2540.02	-977.93	-1025.4	1	80	0	0	1	180	90.99	31.51	0	1.2	3.1	73	95	4	NA	NA	12.3	1.1	29.1
15198396	31968348	28940523	51	2	1	71.5	152	86	71	11	98	11	3	1	0	0	0	1	0	0	0	0	0	47.25	1	17/9/2160 14:00:00	17/9/2160 12:05:00	-133.93	-2368.26	-1368.01	0	0	0	0	1	8	NA	36.14	0	3.7	2.1	39	50	0.2	NA	NA	14.7	1.4	75.7
15204620	35187204	25099522	63	2	2	60.7	165	107	84	27	97	5	9	1	0	0	0	1	0	0	0	0	0	100.73	1	20/9/2160 20:00:00	20/9/2160 19:46:15	1605.07	-810.67	1842.5	1	70	0	0	0	0	15.13	15.13	1	1.4	3	34	38	0.3	NA	NA	20.6	2	35
15204919	33499069	28403036	54	2	1	71.7	160	139	123	19	91	5	3	0	0	0	1	0	0	0	0	0	0	284.97	1	2/5/2172 09:00:00	1/5/2172 20:06:58	2605.36	1168.92	2408.76	0	0	0	0	1	153	NA	32.67	0	0.7	2.2	14	18	0.5	NA	NA	NA	NA	NA
15210676	32820727	29555928	65	1	1	98	178	84	62	14	96	8	4	0	0	0	1	0	0	0	0	0	0	88.08	1	5/12/2157 11:55:00	5/12/2157 10:49:45	11293.3	-2036.21	-1710	0	0	0	0	1	84	NA	13.01	0	1.3	NA	NA	NA	NA	NA	NA	18.4	1.7	31.1
15213253	36597046	20384962	58	2	1	149.8	152	100	110	23	94	1	4	1	1	0	1	0	0	0	0	0	0	65.92	1	27/2/2157 01:30:00	27/2/2157 00:17:19	-4330.55	-4370	-902.31	1	5	0	0	0	0	NA	14.83	0	0.4	3.9	17	27	0.3	NA	NA	13.8	1.2	24.5
15276880	30980315	24782337	76	1	2	114.7	173	103	93	15	92	7	5	1	0	0	0	1	0	0	2	1	19/5/2187 09:00:00	145.77	1	11/5/2187 18:20:00	11/5/2187 18:11:00	616.73	97.32	-2032.06	1	160	0	0	1	266	8.32	8.56	1	1.4	2.5	121	146	0.4	NA	NA	12.1	1.1	22.6
15281657	35838821	25693969	81	2	2	80	168	60	75	13	98	7	10	0	1	0	1	1	0	0	5	1	21/12/2127 18:00:00	82.88	1	24/12/2127 09:00:00	16/12/2127 13:17:59	-31.44	932.93	626.59	1	50	0	0	1	56	363.45	92.21	0	3.5	2.7	52	51	0.2	NA	NA	12.8	1.2	51.3
15303179	33404300	21447455	82	1	1	62.4	177	90	60	36	100	8	6	1	0	0	1	0	0	0	0	0	0	104	1	8/7/2193 00:00:00	7/7/2193 22:36:33	3151.41	-438.42	-2701.1	1	40	0	0	1	24	24.06	11.76	1	1.1	NA	23	36	0.4	NA	NA	12.6	1.2	35.7
15324151	37512067	29324322	86	1	1	69.9	183	69	64	35	89	7	5	0	0	0	0	1	0	0	0	0	0	486.22	1	6/1/2143 22:00:00	6/1/2143 20:08:00	8291.57	-3375	-1395	1	115	1	400	1	144	23.24	23.95	1	0.6	2.2	157	263	0.3	NA	NA	14.4	1.3	31
15331613	33271203	25231997	65	2	1	58.55	NA	99	62	22	94	5	5	0	0	0	1	0	0	0	0	0	0	52	1	18/3/2183 08:00:00	17/3/2183 13:56:14	-2766.37	-644.27	295	0	0	0	0	1	58	178.42	22.12	0	0.5	2.7	11	17	1	NA	NA	15.3	1.4	37.8
15335163	39788932	23453495	69	2	1	100.9	170	98	62	26	97	9	3	1	0	0	0	1	0	1	0	0	0	322.52	1	16/3/2146 17:53:00	16/3/2146 17:33:00	8666.82	-222.59	-3806.08	1	40	0	0	1	8	304.3	17.94	0	1.4	3	29	13	0.2	NA	NA	11.6	1	27.4
15371701	32666850	26268759	87	2	1	80.8	157	55	34	17	95	10	8	0	1	0	1	1	0	0	2	1	13/2/2176 20:00:00	130.87	1	8/2/2176 21:37:00	8/2/2176 21:29:02	9004.58	3102.55	-33.53	1	30	0	0	1	1872	5.27	5.75	1	0.9	2.5	44	136	1	NA	NA	16.1	1.4	150
15379576	39016298	24013180	78	1	1	84	170	56	71	23	97	6	7	0	1	0	1	1	0	0	0	0	0	357	1	29/7/2148 18:00:00	28/7/2148 22:11:27	3229.51	-1206.14	1244.6	1	19	0	0	1	224	148	37.78	0	1.6	2.2	58	25	0.3	NA	NA	10.8	1	25.4
15403293	31710974	26027504	69	1	1	96.5	165	100	91	19	95	1	5	1	1	0	1	0	0	0	0	0	0	16	1	24/12/2158 08:00:00	23/12/2158 16:59:00	140	-3045	-1470	1	70	0	0	0	0	44.36	6.01	0	1.2	NA	NA	NA	NA	NA	NA	NA	NA	NA
15403759	36522750	24475675	63	1	1	82.3	NA	128	89	23	92	8	10	0	1	0	1	1	0	0	0	0	0	12	1	13/10/2175 06:00:00	13/10/2175 04:27:53	1026.17	-460	255	1	10	0	0	1	50	NA	21.6	0	3.5	3.4	29	39	0.5	NA	NA	17.5	1.6	20.9
15421738	35668863	24578339	79	2	1	53.4	157	85	72	16	100	7	10	0	0	0	0	1	0	0	0	0	0	160.5	1	28/9/2179 21:30:00	28/9/2179 19:55:49	1299.04	132	-695	0	0	0	0	1	100	8	8.32	1	3	3	18	32	0.2	NA	NA	11.9	1.1	27.9
15425696	31092541	23420382	69	1	2	96.7	NA	93	106	12	97	6	4	1	1	0	0	0	0	0	0	0	0	328	1	27/4/2136 18:00:00	27/4/2136 17:49:01	-279.01	-2635.44	-2189.65	0	0	0	0	0	0	2512.26	14.03	0	0.8	NA	32	22	0.4	NA	NA	12.8	1.2	24.9
15447957	31890833	29643050	50	1	1	127	NA	95	78	17	89	5	6	1	1	0	1	0	0	0	0	0	0	82.35	1	7/3/2142 00:00:00	6/3/2142 23:03:12	-2871	-930	-3758	0	0	0	0	0	0	NA	6.9	0	0.8	NA	NA	NA	NA	NA	NA	16.4	1.5	28.1
15452777	38862706	23098609	68	1	1	62.95	165	66	77	13	94	6	9	0	1	0	1	1	0	0	2	1	25/3/2158 13:00:00	154	1	18/3/2158 17:00:00	18/3/2158 16:00:12	-3119.5	-1050.18	578.01	1	150	0	0	1	482	20.18	20.72	1	1.8	2.5	9	22	3.1	NA	NA	13.4	1.2	50.2
15456778	37953488	26894767	72	1	1	114	NA	61	58	15	95	4	7	0	0	0	1	1	0	0	0	0	0	125	1	20/12/2158 00:00:00	19/12/2158 23:50:12	1033.39	239.28	-2571.34	1	120	1	400	1	684	349.23	34.99	0	1.2	2.9	395	402	0.6	NA	NA	18.4	1.7	36.3
15475850	34870227	27216312	70	1	1	62	178	81	84	23	97	4	6	0	0	0	0	1	0	0	0	0	0	115.87	1	30/7/2153 16:53:00	30/7/2153 16:17:00	772.5	3087.63	3386.03	0	0	0	0	1	420	16.38	16.7	1	0.8	2.8	9	10	NA	NA	NA	13	1.2	31.8
15487342	31769796	23392741	43	2	2	125.6	NA	112	73	27	91	7	2	0	1	0	0	0	0	0	0	0	0	219.75	1	24/11/2157 00:00:00	23/11/2157 22:51:00	42.03	-166.88	-881.61	1	100	0	0	0	0	NA	12.93	0	0.7	3.3	25	22	0.2	NA	NA	10.6	1	28.2
15522915	30484808	21244726	62	1	1	125.233	173	89	83	17	95	6	5	1	0	0	0	1	0	0	0	0	0	68.75	1	10/10/2168 15:56:00	10/10/2168 15:44:41	2984.4	-375.55	-1855.08	1	60	0	0	0	0	NA	8.07	0	1.4	NA	19	27	0.7	NA	NA	13.7	1.3	29.4
15524578	38293164	28819632	54	1	2	69	157	75	69	18	96	1	2	0	0	0	0	0	0	0	0	0	0	5	1	1/3/2179 11:00:00	25/2/2179 18:40:43	-3070.03	484.61	-1481	1	44	0	0	0	0	NA	6.94	0	0.5	3.8	42	52	0.7	NA	NA	12.1	1.1	26.3
15524969	30594711	23082860	68	1	1	46	NA	49	93	26	94	1	6	1	0	0	0	0	0	0	0	0	0	4.75	1	12/7/2111 11:15:00	6/7/2111 01:24:00	1384.42	1464.01	2015	0	0	0	0	0	0	NA	22.74	0	0.9	NA	57	58	0.4	NA	NA	11.8	1.1	55
15525007	38692760	22158128	46	1	2	96.2	175	137	104	32	99	10	3	0	0	0	1	1	0	0	0	0	0	97	1	25/1/2152 02:00:00	24/1/2152 23:54:10	2010	-465	-1132.34	1	40	0	0	0	0	377	13.64	0	1.3	3.6	685	716	2.5	NA	NA	30.8	2.9	48.2
15543341	32380935	29003029	88	2	1	83.1	160	90	84	20	94	7	8	0	0	0	1	1	0	0	0	0	0	44	1	19/9/2146 20:00:00	17/9/2146 16:13:30	58.08	-705.55	-1265.17	1	160	0	0	0	0	NA	16.07	0	1.2	3.1	16	19	0.9	NA	NA	27.4	2.5	27.2
15554865	34700005	29212497	69	2	2	119.05	168	124	67	19	96	7	10	0	1	0	1	1	0	0	0	0	0	166	1	9/10/2187 14:00:00	9/10/2187 11:12:12	143.58	1352.92	121.27	1	100	0	0	1	60	1109.78	13.3	0	2.8	NA	23	15	0.3	NA	NA	10.8	1	30.1
15589498	35463137	24026421	77	2	1	73.6	NA	107	110	14	95	1	7	0	0	0	1	0	0	1	0	0	0	0	0	0	8/2/2116 21:05:00	308.93	270	-695	0	0	0	0	0	0	NA	6.78	0	0.8	NA	84	44	0.4	NA	NA	12.6	1.2	27.1
15591081	38234891	27715548	65	1	2	80.3	NA	83	102	17	100	11	4	0	0	0	0	0	0	0	0	0	0	103	1	15/11/2142 05:00:00	15/11/2142 03:01:00	5125.25	4794.79	2756.88	1	40	0	0	1	136	3.92	4.47	1	0.8	4.3	93	120	0.4	NA	NA	NA	NA	NA
15625307	34604492	22826841	82	2	1	70.4	155	83	50	24	100	10	8	1	0	0	1	1	0	0	4	1	22/3/2147 14:16:00	150	1	19/3/2147 13:00:00	19/3/2147 12:15:24	9572.01	654.77	3540.19	0	0	0	0	1	1858	5.57	6.53	1	2.3	3.2	120	607	0.5	NA	NA	17.6	1.6	77.6
15628528	30190745	22293928	75	1	2	76.3	173	69	67	24	95	7	8	0	1	0	1	1	0	0	0	0	0	496.3	1	5/9/2115 06:30:00	5/9/2115 00:22:00	3088.23	1486.13	-28.09	0	0	0	0	1	68	NA	22.74	0	1.4	2.7	21	34	2.1	NA	NA	45.1	4.7	35
15642594	31647510	29379012	62	1	1	113.45	178	73	65	31	100	4	6	0	1	0	1	1	0	0	0	0	0	162	1	26/1/2121 14:00:00	26/1/2121 12:46:35	7241.2	-580.85	-2353.37	0	0	0	0	0	0	NA	13.45	0	1.1	3	44	96	0.7	NA	NA	NA	NA	NA
15650971	38561934	21353701	74	1	2	82.3	183	88	92	43	97	7	4	1	0	0	0	0	0	0	0	0	0	594.32	1	11/10/2149 01:00:00	11/10/2149 00:43:00	2927.26	-1.76	-316.23	1	92.5	0	0	1	332	NA	42.57	0	0.9	4	16	18	0.4	NA	NA	11.8	1.1	25
15726063	36415879	23069026	53	1	1	129.75	178	72	63	31	83	8	4	0	0	0	1	0	0	0	0	0	0	162.67	1	20/5/2168 13:20:00	20/5/2168 12:59:00	4960.11	1878	-715.12	1	10	0	0	1	8	NA	11.3	0	0.8	3.8	15	36	1.1	NA	NA	17.6	1.6	28.3
15741496	33618113	25906108	59	1	1	134.1	178	130	92	32	93	1	4	0	1	0	1	0	0	0	0	0	0	29	1	18/3/2138 15:00:00	18/3/2138 13:16:00	-980	874.86	-1679.59	1	45	0	0	0	0	NA	14.19	0	0.9	3.6	35	20	0.3	NA	NA	12.5	1.2	29.5
15745543	39334307	22480057	78	1	1	75.6	NA	143	79	31	99	2	6	0	0	0	0	0	0	0	0	0	0	47.68	1	14/2/2148 20:19:00	14/2/2148 19:35:00	2050.57	400.59	87.59	0	0	0	0	0	0	3227.28	5	0	1.6	3.4	NA	NA	NA	NA	NA	13.7	1.2	114.9
15746216	31192337	21229169	68	2	1	89	165	90	73	21	100	9	7	0	1	0	1	1	0	0	6	1	25/8/2164 21:00:00	0	0	0	22/8/2164 14:33:42	2061.49	1074.89	1214.83	1	50	0	0	1	124	12.54	13.1	1	1.8	3.1	9	15	0.8	NA	NA	14.9	1.4	68
15752558	30479422	29586054	72	1	1	76.2	168	105	71	24	96	6	5	0	0	0	0	0	0	0	0	0	0	83.67	1	7/8/2150 00:20:00	6/8/2150 23:26:19	4425.42	234.11	1312.81	0	0	0	0	1	8	NA	7.69	0	0.6	3.3	43	17	0.6	NA	NA	10.4	1	25
15774199	32452165	29279756	62	2	1	85.4	157	83	92	15	96	4	10	0	1	0	1	0	0	1	0	0	0	264.58	1	29/7/2137 00:00:00	28/7/2137 03:19:00	2495.42	-1264.05	-1940.23	1	8	0	0	1	100.5	NA	19.58	0	0.5	3.4	8	32	0.4	NA	NA	11	1	26.9
15793456	31060201	22323975	57	1	2	86.5	180	99	126	25	95	1	2	1	0	0	0	1	0	0	0	0	0	271.97	1	14/3/2187 23:15:00	14/3/2187 21:08:57	0	3440.7	-304.85	1	60	0	0	1	16	NA	12.95	0	1.2	NA	34	24	0.4	NA	NA	11.9	1.1	23.9
15802366	33638538	29126724	71	1	2	64.65	183	94	79	15	95	15	8	1	1	0	0	1	1	0	0	0	0	103.32	1	24/12/2139 08:00:00	24/12/2139 07:02:00	3775.79	1483.76	228.8	0	0	0	0	1	68	20.77	11.5	1	2.2	3.5	28	46	2.5	NA	NA	16.5	1.5	32.9
15809646	36899083	24329200	79	1	1	96.85	183	151	103	21	94	9	5	0	0	0	1	1	0	0	0	0	0	118.73	1	5/12/2146 10:30:00	5/12/2146 09:15:37	4262.82	1708.16	-1512	1	100	0	0	1	68	NA	10.35	0	3.7	NA	69	25	0.5	NA	NA	12	1.1	24.3
15812903	34859091	23133491	62	1	2	62.4	NA	74	65	10	94	2	10	1	1	0	0	0	0	0	0	0	0	95	1	23/12/2178 01:00:00	22/12/2178 23:26:30	2891.49	-3665	3230	0	0	0	0	0	0	4.02	4.19	1	0.5	NA	12	10	0.4	NA	NA	14.7	1.3	30.3
15824797	30993958	25863554	60	2	2	58.8	152	69	80	17	98	1	4	0	0	0	1	0	0	0	0	0	0	184	1	13/11/2111 12:00:00	10/11/2111 23:10:21	-1547.1	235.65	-532.14	0	0	0	0	0	0	NA	16.66	0	0.7	3.1	35	55	0.8	NA	NA	12.3	1.1	28
15885615	35292709	20901290	84	1	1	72.7	168	115	59	18	96	2	8	1	0	0	1	1	0	0	0	0	0	36	1	14/8/2171 20:00:00	11/8/2171 00:04:50	-522.08	1221.25	-455	0	0	0	0	0	0	41.89	15.62	0	1.2	2.4	32	36	0.2	NA	NA	14.3	1.2	24.8
15892671	35432411	22258372	60	2	2	120.8	NA	119	88	49	93	3	4	1	0	0	0	0	0	0	0	0	0	68.02	1	27/3/2171 12:59:00	27/3/2171 12:40:00	247.7	-751.58	-1475	0	0	0	0	0	0	NA	11.21	0	1	NA	NA	NA	NA	NA	NA	11.6	1.1	27.4
15945073	33327195	26230106	60	1	1	104.3	180	86	61	14	100	8	5	1	1	0	0	0	0	0	0	0	0	141.72	1	11/7/2113 18:17:00	11/7/2113 12:53:39	14082.7	1432.42	-4361.08	0	0	0	0	0	0	NA	21.23	0	1	2.3	48	59	2.2	NA	NA	15.7	1.5	46.9
15951813	38398105	24198118	66	1	2	124.5	185	80	87	18	96	4	5	1	1	0	0	0	0	0	0	0	0	225.75	1	21/6/2137 11:00:00	21/6/2137 10:04:00	1216.99	1136.25	-1660.68	1	60	0	0	0	0	NA	11.42	0	1.1	NA	22	20	0.4	NA	NA	11.9	1.1	29.1
15955787	37056417	26580342	49	2	1	71.5	127	68	131	22	98	2	1	0	0	0	0	0	0	0	0	0	0	489	1	5/4/2180 22:00:00	5/4/2180 21:56:00	3534.73	402.97	-1950.02	1	10	0	0	1	0.5	NA	27.95	0	0.3	2.3	15	50	0.3	NA	NA	12.4	1.1	61.5
15974615	35996163	21212325	86	2	1	69	152	86	127	21	94	9	11	0	1	0	0	1	0	0	0	0	0	90.87	1	19/6/2156 01:08:00	19/6/2156 01:06:00	647.88	-726.53	-246.4	0	0	0	0	1	108	NA	12.82	0	3.1	2.9	1312	1266	0.4	NA	NA	13.5	1.2	24.1
15979656	32246818	25470261	56	1	2	61.3	168	108	90	35	80	8	8	0	0	0	0	0	0	0	0	0	0	113.8	1	4/10/2188 04:30:00	3/10/2188 19:44:55	3419.45	500.54	1029.33	1	100	0	0	1	8	4.7	4.7	1	0.6	3.4	16	39	0.6	NA	NA	NA	NA	NA
15980434	33198191	27675397	77	1	2	76.4	163	106	85	30	97	9	7	1	0	0	0	1	0	0	3	1	22/12/2156 19:00:00	164.5	1	19/12/2156 17:00:00	19/12/2156 14:52:00	4200	-660	-424.19	1	6	0	0	0	0	503.46	40.2	0	3.1	3.4	27	79	2.5	NA	NA	16.3	1.5	28.7
15983568	30128855	27344395	91	2	1	42	147	133	87	16	97	11	9	0	1	0	1	0	0	0	0	0	0	140.67	1	3/1/2173 11:38:00	3/1/2173 11:30:50	5333.05	2686	-2668.67	1	4	0	0	1	8	45.95	35.66	0	0.8	2.4	71	138	0.2	NA	NA	13.6	1.2	58.2
15986375	32126026	24388957	91	1	1	71.25	NA	106	68	14	100	2	9	0	0	0	0	1	0	0	0	0	0	0	0	0	5/2/2166 14:28:00	-1559.03	908.2	924.87	1	129	0	0	0	0	NA	5.14	0	1.5	NA	30	40	0.6	NA	NA	12.9	1.1	23.9
16057835	31811379	27045970	71	2	1	65.7	165	117	77	35	92	3	5	1	0	0	0	1	0	0	0	0	0	157	1	24/5/2192 20:00:00	23/5/2192 13:02:09	3935	664.34	1153.98	0	0	0	0	0	0	1078.17	17.84	0	0.4	2.2	12	10	0.2	NA	NA	16.1	1.5	28.6
16068510	32787832	24721272	85	2	2	72.4	157	97	73	16	97	7	7	1	0	0	1	0	0	0	0	0	0	118.5	1	15/12/2142 17:30:00	15/12/2142 14:50:13	-578.89	-584.98	-1331.25	0	0	1	400	0	0	NA	6.95	0	0.9	3.1	14	27	0.3	NA	NA	15.9	1.4	33.3
16074364	31792088	23848578	81	2	1	72.3	155	116	103	24	91	4	11	0	1	0	1	1	0	0	0	0	0	41.83	1	28/6/2185 20:09:00	28/6/2185 19:59:00	-875.08	1210	-125	0	0	0	0	0	0	74.2	7.06	0	1.4	2.8	53	30	0.5	NA	NA	23.4	2.2	29.2
16075171	32447165	29239803	68	1	1	72.4	NA	96	102	21	98	4	6	1	0	0	1	1	0	0	0	0	0	174.52	1	7/7/2172 00:21:00	7/7/2172 00:09:00	2000.18	33.68	-1231.57	1	30	0	0	1	60	1285.03	17.69	0	1.3	3.4	11	16	0.7	NA	NA	15.8	1.4	150
16093254	32021671	21076930	83	2	1	99.1	NA	78	91	28	94	3	7	0	1	0	1	0	0	0	0	0	0	111.38	1	19/9/2168 18:37:00	19/9/2168 14:42:00	-440.55	810.84	76.12	0	0	0	0	0	0	NA	9.11	0	0.7	NA	16	26	NA	NA	NA	NA	NA	NA
16114379	30106115	25953914	75	2	1	48.25	157	74	76	30	99	3	5	1	0	0	0	0	0	0	0	0	0	333.43	1	31/1/2174 04:00:00	31/1/2174 02:36:00	3143.73	-42.78	-1764.12	0	0	0	0	1	100	23.91	23.95	1	0.5	3.2	9	18	0.5	NA	NA	12	1.1	27.5
16130487	37652413	27778408	61	1	1	162.6	175	64	78	20	92	6	8	0	0	0	1	1	0	0	0	0	0	22.75	1	16/10/2122 20:00:00	16/10/2122 17:19:05	756.19	705.33	604.12	1	200	0	0	1	324	362.28	40.96	0	1	2.6	NA	15	1.2	NA	NA	15.8	1.5	39.7
16139570	36850226	23551539	95	2	2	55.7	NA	94	63	14	99	6	5	1	0	0	0	1	0	0	0	0	0	83.52	1	5/9/2176 00:29:00	4/9/2176 23:50:00	4006.3	2028.8	782.38	0	0	0	0	0	0	4.06	4.58	1	1.2	2.6	NA	NA	NA	NA	NA	12.8	1.1	29.4
16143265	36889522	25523129	85	1	2	57.7	NA	61	68	32	91	3	9	0	0	0	1	1	0	0	0	0	0	43.45	1	7/5/2116 23:44:00	7/5/2116 23:15:34	-93.75	1672.65	1538.8	1	10	0	0	0	0	6.96	6.96	1	2.1	NA	72	38	0.5	NA	NA	15.4	1.4	31.4
16147935	35318623	24304765	59	2	2	48.5667	170	112	64	26	96	6	9	0	0	0	0	0	0	0	0	0	0	2	1	23/9/2142 12:00:00	19/9/2142 06:21:18	1116.88	1921.12	-618.96	1	73	0	0	1	8	NA	6.91	0	0.4	NA	19	18	NA	NA	NA	11.1	1	35.4
16148295	30013402	22547615	75	1	1	120.35	NA	62	78	18	98	7	8	0	0	0	0	1	0	0	0	0	0	51.5	1	21/3/2169 13:00:00	21/3/2169 07:17:25	14.62	-1915	-2510	0	0	0	0	0	0	NA	8.29	0	2.7	3.3	12	15	0.4	NA	NA	12.7	1.2	29.6
16155910	31149608	25117361	68	1	1	69	168	130	99	18	86	15	6	1	0	0	0	1	1	0	3	1	25/5/2123 02:00:00	200	1	20/5/2123 17:00:00	20/5/2123 16:03:16	4142.05	2148.13	-777.4	1	320	0	0	1	66	18.04	17.79	1	1.2	2.7	108	151	4.3	NA	NA	23.1	2.1	45.3
16196603	37401376	23111128	48	2	2	145.5	157	122	60	27	92	7	3	1	0	0	1	0	0	0	0	0	0	375.53	1	30/7/2163 05:00:00	30/7/2163 04:52:00	-1215.09	1265.45	-2688.69	1	75	0	0	0	0	NA	26.6	0	0.7	3.8	114	90	2.4	NA	NA	NA	NA	NA
16201537	35049724	27896675	75	2	1	85.7	NA	107	70	29	93	5	7	1	1	0	1	0	0	0	0	0	0	322.25	1	4/2/2135 20:00:00	4/2/2135 18:18:47	8305.46	-503.21	77.32	1	2.5	0	0	1	8	NA	14.86	0	1.8	2.3	21	13	0.6	NA	NA	13.8	1.2	31
16238782	36334431	28975479	73	2	1	70.6	160	117	117	35	97	3	4	1	0	0	0	0	0	0	0	0	0	174	1	10/2/2169 12:00:00	10/2/2169 10:30:16	-898.63	377.76	128.78	1	62	0	0	1	8	9.14	9.45	1	0.7	NA	NA	NA	NA	NA	NA	10.4	1	22.5
16268506	39043482	20763365	81	2	2	94.0667	NA	65	69	22	100	7	8	0	0	0	0	1	0	0	0	0	0	0	0	0	24/4/2188 08:40:00	1354.85	2928.55	-2287	0	0	1	800	1	24	652.8	32.55	0	3.1	3	23	21	0.2	NA	NA	13.2	1.2	25
16287567	39473860	25244479	62	1	1	89.9	NA	80	80	18	95	1	9	0	0	0	0	0	0	0	0	0	0	90	1	23/9/2161 20:00:00	23/9/2161 19:44:00	21.49	216.72	-286.19	1	598	0	0	0	0	89.22	22.05	0	0.8	2.9	22	19	0.2	NA	NA	14.4	1.3	53.3
16291864	32985850	21667672	77	2	1	74.9	163	96	70	23	99	1	5	1	0	0	0	0	0	0	0	0	0	339.67	1	14/12/2142 04:20:00	14/12/2142 04:01:24	2832.24	372.62	-2225	0	0	0	0	1	120	NA	18.64	0	0.8	3.4	24	35	0.3	NA	NA	12.7	1.2	31.6
16292532	36782820	27861667	72	1	1	86.3	183	80	60	18	100	10	8	1	0	0	1	0	0	0	0	0	0	230	1	7/5/2147 22:00:00	7/5/2147 19:38:19	4132.66	-743.42	-3653.73	0	0	0	0	1	74	NA	10.85	0	0.6	2	17	31	0.3	NA	NA	14	1.2	31.6
16308695	34231438	29785036	72	1	1	90.1	173	128	87	27	94	2	4	0	0	0	0	0	0	0	0	0	0	124.67	1	25/7/2129 06:20:00	25/7/2129 06:09:54	-945.15	2836.39	-1681.3	1	140	0	0	1	58	145.13	23.68	0	0.4	NA	NA	NA	NA	NA	NA	13.1	1.2	124.4
16312944	38335619	26677855	81	2	1	63	NA	86	61	31	96	7	10	0	0	0	1	1	0	0	0	0	0	72.57	1	19/8/2167 01:00:00	18/8/2167 20:24:00	-578.49	-391	-1040.27	1	40	0	0	0	0	329.19	6.76	0	2.1	3.9	NA	NA	0.8	NA	NA	13.5	1.3	24.6
16316762	31275316	24463238	69	2	1	78	173	63	65	15	97	7	5	1	1	0	0	1	0	0	0	0	0	139.5	1	16/4/2180 19:30:00	16/4/2180 18:55:00	12949.4	-1870.11	-2758.17	1	10	1	400	1	8	425.29	8.04	0	1	NA	NA	NA	NA	NA	NA	12.2	1	24.2
16337772	33547790	28264759	83	1	1	76.5	183	72	87	15	100	7	7	1	1	0	1	0	0	0	0	0	0	95	1	5/6/2171 12:00:00	5/6/2171 12:00:00	2749.46	1085.61	538.63	0	0	0	0	0	0	NA	12.19	0	1.2	3.6	18	37	NA	NA	NA	13.3	1.1	32.9
16364440	30573858	29315532	57	1	1	87.1	168	98	77	15	91	4	5	0	1	0	1	0	0	0	0	0	0	10	1	11/2/2115 10:00:00	6/2/2115 04:06:00	2700.11	150.71	-297.1	0	0	0	0	0	0	NA	6.42	0	0.7	NA	NA	NA	NA	NA	NA	52.8	5.8	45.8
16379195	31612054	21669898	64	1	2	75.9	NA	76	63	18	100	7	4	0	1	0	0	0	0	0	0	0	0	79	1	10/9/2116 06:00:00	10/9/2116 05:59:00	9069.92	-1682.33	-1575	1	300	0	0	1	8	NA	6.36	0	0.5	3.2	12	10	0.4	NA	NA	13.8	1.3	40.9
16387187	30732138	26857526	83	2	1	48.8	152	91	97	11	100	7	6	1	0	0	1	1	0	0	0	0	0	548.2	1	10/11/2147 16:40:00	10/11/2147 16:24:30	-223.88	-59	-6.93	1	10	0	0	0	0	38.32	23.12	0	1.5	3.5	7	33	0.4	NA	NA	13.6	1.2	26.2
16432799	36663704	26412554	86	2	1	58.3	165	85	49	18	99	3	6	1	0	0	0	1	0	0	0	0	0	27.58	1	24/1/2152 21:05:00	11/1/2152 17:30:00	4757.16	2992.89	-520.35	1	45	0	0	0	0	NA	28.01	0	1	NA	NA	NA	NA	NA	NA	11	0.9	28.7
16433790	37001817	22652057	83	1	1	68.25	NA	101	68	19	100	6	9	0	0	0	1	0	0	0	0	0	0	87.17	1	20/12/2179 19:50:00	20/12/2179 19:21:45	6193.16	458.82	-258.73	0	0	0	0	1	382	64.14	48.96	0	1.3	2.6	7	11	0.2	NA	NA	13.1	1.2	30.3
16442766	32880944	24793343	80	1	1	129.8	168	96	85	19	82	8	8	0	1	0	1	1	0	0	0	0	0	418.75	1	8/10/2176 04:00:00	8/10/2176 02:35:00	2737.59	1075.92	82.8	0	0	0	0	1	76	65.92	25.64	0	1.1	3	31	28	0.9	NA	NA	14.8	1.3	31
16455067	36398667	27125531	90	1	1	66.1	157	97	73	14	92	8	13	0	1	0	1	1	0	0	0	0	0	90	1	17/8/2129 13:00:00	17/8/2129 12:59:00	4053.08	1332.06	1875.01	0	0	0	0	0	0	5.55	5.61	1	2.6	NA	NA	NA	NA	NA	NA	12.8	1.2	88.8
16466390	31593300	21035609	72	1	2	85.9	178	72	82	15	100	8	9	0	0	0	0	1	0	0	0	0	0	43.78	1	12/9/2177 15:00:00	8/9/2177 23:33:59	2901.64	820.58	-655.33	0	0	0	0	1	122	NA	13.85	0	1.3	4	30	109	0.2	NA	NA	13.3	1.2	34.5
16467816	39022990	28127824	72	1	2	100	168	88	71	22	99	13	5	1	1	0	0	1	0	0	0	0	0	593.42	1	18/6/2178 18:00:00	18/6/2178 16:14:54	-1112.25	-1934.44	-982.79	0	0	0	0	1	8	49.32	25.01	0	1.5	3.1	29	37	1.2	NA	NA	12.3	1.1	26.2
16477638	35828750	26610640	74	2	2	60.35	NA	88	55	22	96	3	12	0	1	0	0	1	0	0	0	0	0	0	0	0	11/8/2211 03:04:00	1163.68	1119.12	-1110	0	0	0	0	0	0	35.94	12.57	0	1.4	NA	8	18	0.6	NA	NA	NA	13.8	103.8
16488736	38654390	21817282	75	1	2	112.5	175	80	69	11	100	7	8	0	1	0	1	1	0	1	0	0	0	179.68	1	19/10/2137 16:19:00	19/10/2137 10:16:12	3006.94	381.24	-1543.93	1	115	0	0	1	72.5	3538.15	14.7	0	1.7	NA	NA	NA	NA	NA	NA	15.5	1.4	31.5
16507161	38717398	23872065	68	1	1	107.6	NA	83	92	31	98	3	5	1	0	0	0	0	0	0	0	0	0	83.2	1	12/6/2169 00:47:00	11/6/2169 22:13:24	-715	-1115	620.5	0	0	0	0	0	0	5.15	5.71	1	0.7	4	15	16	0.3	NA	NA	10.7	1	NA
16513166	38445207	29175242	54	1	1	77.3333	165	107	97	28	96	2	4	0	1	0	0	0	0	0	0	0	0	76.75	1	15/12/2183 12:00:00	15/12/2183 11:53:00	3673	-800	675.67	0	0	0	0	0	0	528.68	4.27	0	0.5	NA	NA	NA	NA	NA	NA	NA	NA	NA
16561689	36616270	21669480	92	2	1	57	155	88	89	29	93	5	6	0	0	0	1	1	0	0	0	0	0	78.52	1	6/1/2179 23:00:00	6/1/2179 15:41:00	-57.5	150	-1540	0	0	0	0	0	0	151.46	6.24	0	1.1	NA	NA	NA	NA	NA	NA	36.8	3.9	50.2
16567081	31028994	25565474	76	1	1	73.6	163	115	77	23	96	5	8	0	0	0	1	0	0	0	0	0	0	99.52	1	26/3/2161 18:00:00	26/3/2161 15:45:00	-316.39	566.46	366.7	1	51	0	0	1	100	425.39	18.94	0	6	3	22	40	0.2	NA	NA	12.4	1.1	48.6
16568863	39486879	28183160	70	2	1	110.6	168	94	76	21	91	8	11	1	1	0	0	1	0	0	0	0	0	132.67	1	11/4/2187 16:22:00	11/4/2187 15:21:22	1203	-165	620	1	20	0	0	0	0	81.11	16.61	0	1.5	3.4	52	56	0.3	NA	NA	14.1	1.2	25.9
16570501	34367685	29482513	84	2	1	63	165	70	76	14	100	1	9	0	0	0	1	0	0	0	0	0	0	94.05	1	11/11/2152 13:57:00	11/11/2152 13:50:18	-228.38	1092.87	-996.21	0	0	0	0	0	0	NA	7.03	0	0.8	2.5	15	17	0.7	NA	NA	14.7	1.3	24.6
16578832	33938469	24941390	76	2	1	64.2	168	136	75	29	88	5	5	0	0	0	1	0	0	0	0	0	0	90.83	1	11/12/2159 00:51:00	10/12/2159 20:41:00	-2074.4	-1166	-164.17	0	0	0	0	0	0	6.24	5.89	1	0.7	NA	NA	NA	NA	NA	NA	NA	NA	NA
16622813	32922138	26382064	81	1	1	80.8	178	74	69	14	100	7	7	1	0	0	1	1	0	0	0	0	0	142.98	1	9/11/2180 21:28:00	9/11/2180 20:46:31	8139.27	2663.98	-2641.76	0	0	0	0	0	0	1383.2	12.75	0	1.8	NA	NA	NA	NA	NA	NA	13	1.1	27.9
16645325	37532286	26608451	78	2	1	56	157	102	61	20	88	2	5	1	1	0	0	1	0	0	0	0	0	108	1	18/8/2131 20:00:00	18/8/2131 17:58:59	6301.38	4525.18	2795.13	1	110	0	0	1	120	5.43	6.31	1	1.2	2.8	12	18	0.4	NA	NA	14.9	1.4	36.4
16661755	30586760	22250253	72	2	2	86.2	NA	71	56	19	100	5	13	0	1	0	1	0	0	0	0	0	0	64.45	1	8/6/2174 00:33:00	8/6/2174 00:24:00	-2460	1340	1823.83	0	0	0	0	0	0	NA	6.7	0	1	NA	NA	NA	0.2	NA	NA	12.8	1.2	25.3
16693848	35662074	26492894	76	2	1	69.75	163	77	93	17	100	5	10	0	1	0	1	1	0	0	0	0	0	98.5	1	5/8/2140 01:30:00	5/8/2140 01:14:00	6331.12	1921.02	99.58	1	175	0	0	1	2	218.98	31.67	0	1.9	3.2	4	16	0.3	NA	NA	11.8	1.1	23.9
16702834	37216514	29247699	63	1	1	63.4	163	71	123	12	91	4	3	0	0	0	0	0	0	0	0	0	0	64.52	1	11/9/2152 11:29:00	11/9/2152 09:43:52	-544.2	-778.83	-294.43	0	0	0	0	0	0	1124.61	6.34	0	0.9	NA	NA	NA	NA	NA	NA	NA	NA	NA
16715089	33127178	27414619	62	1	2	65.8	NA	83	80	18	100	5	9	0	1	0	1	1	0	0	0	0	0	47.43	1	2/3/2160 08:00:00	2/3/2160 00:13:24	-1612.92	-816.85	-2215	0	0	0	0	0	0	NA	4.43	0	1.9	NA	37	20	0.2	NA	NA	10.8	1	53.3
16730361	36165885	29771503	75	1	1	87.4333	157	61	104	13	100	10	5	1	0	0	0	0	0	0	0	0	0	211.52	1	11/4/2155 18:11:00	9/4/2155 16:02:36	-2099.5	-81.53	-463.65	0	0	0	0	1	68.5	24.33	24.09	1	0.7	3	NA	7	0.4	NA	NA	12.2	1.1	37.2
16733466	30560523	26369444	88	2	1	38.7	NA	117	122	30	100	6	7	1	0	0	1	1	0	0	0	0	0	67.08	1	9/12/2111 23:00:00	9/12/2111 09:35:00	-361.7	-941.97	80	1	10	0	0	0	0	266.66	26.41	0	1.1	4.1	42	42	0.6	NA	NA	12.9	1.1	31.6
16746504	32267133	23405865	74	2	2	128.5	165	107	104	23	99	5	11	0	1	0	1	0	0	0	0	0	0	70	1	6/4/2164 18:00:00	6/4/2164 16:43:00	1030	-981.5	-1730	0	0	0	0	0	0	4.33	5.08	1	1.3	3.8	13	33	0.5	NA	NA	NA	NA	NA
16748272	33959042	24595438	68	2	2	96.7	NA	100	82	21	92	5	9	1	0	0	0	1	0	0	0	0	0	392.25	1	22/11/2175 19:45:00	22/11/2175 19:32:58	1096.64	-382	1771.66	0	0	0	0	1	8	18.08	18.73	1	1.2	3	22	20	0.4	NA	NA	16.4	1.5	71.4
16762248	32106637	23562993	67	2	1	143.8	152	100	93	25	93	2	5	0	1	0	1	1	0	0	0	0	0	92.3	1	15/4/2146 23:00:00	15/4/2146 00:49:00	-2873	-1608.2	-3490	1	75	0	0	0	0	NA	8.6	0	1.2	NA	NA	NA	NA	NA	NA	NA	NA	NA
16828725	38534147	25835438	79	2	2	58.125	NA	84	65	22	96	8	7	0	0	0	1	0	0	0	0	0	0	65.58	1	8/1/2165 14:17:00	8/1/2165 14:09:47	-575.34	-366.06	482.93	0	0	0	0	0	0	256.41	6.02	0	0.7	NA	436	154	0.4	NA	NA	14.2	1.2	23.6
16886087	35757748	24583202	72	1	1	73.3	175	74	67	24	99	15	9	0	0	0	1	1	0	0	0	0	0	19.2	1	12/1/2140 14:00:00	7/1/2140 18:16:00	-717.07	85.73	-940.53	0	0	0	0	1	16	NA	12	0	3	2.7	16	43	0.7	NA	NA	12.2	1.1	29.6
16898599	37364197	21101909	48	2	2	106.5	160	114	71	26	90	4	3	1	1	0	0	1	0	0	0	0	0	246.5	1	3/7/2136 15:30:00	18/6/2136 23:25:00	5800.9	915.56	-1454.85	1	120	0	0	0	0	NA	35.62	0	0.8	3.6	31	50	0.4	NA	NA	NA	NA	NA
16900375	35414722	22956799	65	1	1	83.1	178	75	94	15	100	1	3	1	0	0	0	0	0	0	0	0	0	697.82	1	8/11/2143 07:00:00	8/11/2143 06:58:00	3910.5	-2254.63	1809.98	0	0	0	0	1	60	NA	30.36	0	0.6	2.5	22	19	0.7	NA	NA	13	1.1	26.4
16934248	34865181	27504332	75	1	1	86	175	64	100	9	94	2	5	1	0	0	0	0	0	0	0	0	0	120	1	20/4/2142 12:00:00	19/4/2142 14:45:26	5513.52	-675.49	-1003	1	15	0	0	1	72	NA	9.73	0	0.9	2.8	24	27	0.6	NA	NA	12.8	1.1	61.9
16941107	36833225	23689276	78	2	2	69	152	108	86	22	95	2	10	0	1	0	1	1	0	0	0	0	0	135.25	1	10/9/2163 14:45:00	10/9/2163 14:16:32	-2081.31	-527.3	155.9	1	40	0	0	1	66	NA	22.92	0	1.3	4.1	9	11	NA	NA	NA	11.1	1	24.2
16947512	34292825	28038616	81	1	1	83.3	173	64	80	16	97	5	10	0	1	0	1	0	0	0	0	0	0	50	1	6/11/2150 14:00:00	5/11/2150 03:19:00	-2898.2	-1581.25	295.68	0	0	0	0	0	0	NA	5.61	0	1.4	NA	24	25	0.8	NA	NA	NA	NA	NA
16985841	32853769	23426019	79	2	1	87.3	157	85	57	25	92	5	11	0	1	0	1	0	0	0	0	0	0	25.6	1	31/8/2187 20:00:00	29/8/2187 22:20:47	-623.52	-2765	-995	0	0	0	0	0	0	252.29	10.13	0	3.2	NA	52	65	0.6	NA	NA	12.7	1.1	23.6
17007441	31504988	20790097	58	1	2	100.2	175	120	83	19	95	4	3	1	1	0	0	1	0	0	0	0	0	26	1	28/6/2138 14:00:00	6/6/2138 01:15:00	631.45	376.65	-632.43	1	170	0	0	1	26	NA	23.73	0	1.1	3.6	164	153	0.4	NA	NA	11.9	1.1	26.6
17019365	33542108	23881657	78	2	2	180	NA	90	74	18	94	3	5	0	0	0	1	0	0	0	0	0	0	81.12	1	19/11/2112 08:00:00	18/11/2112 20:48:59	-77.5	-880	-2975	0	0	0	0	0	0	NA	8.86	0	0.5	3.6	NA	NA	NA	NA	NA	10.8	1	35.6
17027620	33822268	29298848	74	1	2	124.2	183	58	77	12	99	5	5	1	0	0	0	1	0	0	0	0	0	60	1	6/12/2141 16:00:00	6/12/2141 12:46:14	2906.04	-1647.36	-2115	0	0	0	0	1	62	NA	12.2	0	0.6	NA	NA	NA	NA	NA	NA	16.3	1.5	28.4
17049635	36321418	23483060	61	1	1	98.2	NA	117	98	13	98	9	5	0	0	0	0	0	0	0	0	0	0	56	1	31/7/2166 00:00:00	28/7/2166 15:17:00	7027.7	527.12	-900	1	40	0	0	1	8.5	217.46	9.21	0	0.8	2.9	25	20	0.5	NA	NA	14.5	1.3	36.4
17097285	33924440	20900545	66	1	2	166	173	83	73	26	96	7	5	0	0	0	1	0	0	0	0	0	0	92	1	17/8/2185 01:00:00	16/8/2185 23:49:00	3816.78	-3625	-4940.9	0	0	0	0	1	8	NA	12.7	0	1.1	2.9	29	82	0.5	NA	NA	12.9	1.2	24.9
17119475	36614001	25606391	83	2	2	82.35	NA	83	111	22	99	5	8	1	0	0	0	1	0	1	0	0	0	98	1	27/4/2193 02:00:00	27/4/2193 01:21:00	1362.62	-994.49	-468.86	1	75	0	0	0	0	2111.05	16.64	0	1.1	NA	40	31	0.9	NA	NA	15.2	1.4	150
17129688	37157052	21342275	60	2	1	114	157	103	82	23	88	4	8	0	1	0	1	1	0	0	0	0	0	124.32	1	3/5/2146 05:00:00	2/5/2146 21:53:36	-2551.06	-1172.12	-1276.81	0	0	0	0	1	50	1531.21	7.93	0	1.8	NA	19	27	0.3	NA	NA	NA	NA	NA
17167073	30369533	28790100	51	1	2	79.6	188	52	105	29	94	13	3	0	0	0	0	1	0	0	4	1	30/1/2155 21:00:00	132.58	1	27/1/2155 19:25:00	27/1/2155 17:44:03	7533.96	3218.7	715.36	0	0	0	0	1	8	7.42	8.22	1	1.8	2.8	63	122	0.4	NA	NA	11.7	1.1	27.5
17171716	38164320	29153545	62	2	1	127.233	NA	85	104	18	99	7	3	1	0	0	0	0	0	0	0	0	0	52	1	16/11/2191 05:00:00	16/11/2191 00:45:59	5165.7	-695.27	-2035	0	0	0	0	1	8	NA	7.57	0	0.9	3	33	29	0.9	NA	NA	15.2	1.4	34.3
17176996	35102151	25317420	76	1	1	70	185	110	92	21	93	4	11	0	1	0	1	1	0	0	0	0	0	585	1	8/5/2156 20:00:00	8/5/2156 19:50:08	-376.9	983.8	-1800	0	0	0	0	1	86	77.05	77.78	0	0.5	2	12	23	0.5	NA	NA	14.5	1.3	32
17198431	34091251	23652228	54	2	2	115	157	97	89	13	83	8	5	1	1	0	1	0	0	0	0	0	0	98.15	1	19/2/2123 17:51:00	19/2/2123 17:44:22	-2292.96	-445.82	-1742.01	1	30	0	0	1	8	NA	6.89	0	0.7	NA	25	16	0.9	NA	NA	13.1	1.2	25.5
17215682	32798636	28452757	86	1	2	72.9	178	105	51	21	96	9	5	0	0	0	0	0	0	0	0	0	0	101.48	1	1/11/2165 22:31:00	30/10/2165 05:52:00	-81.86	-1830.18	488.62	1	60	0	0	1	128	153.8	9.53	0	1.1	3.5	16	28	1	NA	NA	11.1	1	29.1
17220922	38886396	22892700	76	1	1	102.2	178	101	69	14	91	11	5	0	0	0	1	1	0	0	0	0	0	163.5	1	29/11/2141 20:30:00	29/11/2141 20:19:06	-470.3	-1355	378.67	1	10	0	0	1	58	7.87	8.74	1	1.3	2.6	17	14	2.7	NA	NA	17.1	1.6	28.4
17237690	39324322	28728298	82	1	1	99.7	NA	137	84	24	94	3	5	1	0	0	0	0	0	0	0	0	0	50	1	18/7/2185 19:00:00	18/7/2185 12:37:17	-1312.75	-1070	435	1	81	0	0	0	0	NA	8.82	0	1	2.7	40	29	0.6	NA	NA	NA	NA	NA
17246078	32546118	23716843	82	1	2	59.8	163	98	114	25	100	0	6	1	0	0	0	0	0	0	0	0	0	94.13	1	11/9/2121 09:00:00	11/9/2121 03:35:00	130.17	-468.62	-1724.29	1	50	0	0	0	0	NA	5.5	0	0.9	4.2	NA	NA	NA	NA	NA	45.5	4.9	39.1
17263598	38218041	21277375	76	1	1	50.1	175	115	99	35	98	3	4	0	0	0	0	1	0	0	0	0	0	100.85	1	27/1/2117 23:00:00	27/1/2117 22:36:00	1249.59	-900.98	-578.33	0	0	0	0	0	0	230.1	4.75	0	1.4	NA	NA	NA	NA	NA	NA	14	1.2	62.6
17316172	39259120	20081795	50	1	1	65.15	180	87	103	17	98	1	3	0	0	0	0	0	0	0	0	0	0	36.87	1	11/3/2172 21:08:00	11/3/2172 19:33:08	738.47	680	616.25	1	50	0	0	0	0	2006.19	4.85	0	1	NA	NA	NA	NA	NA	NA	12	1	31
17377661	38897199	23909490	66	1	2	61.55	173	69	97	24	100	7	4	1	0	0	0	0	0	0	0	0	0	82.47	1	10/12/2135 02:00:00	10/12/2135 01:04:00	2578.57	-956.17	-2757.76	1	184	0	0	1	120	220.13	8.79	0	0.6	3.5	19	31	0.4	NA	NA	10.7	1	24.3
17433851	38389427	23971543	78	2	1	65	NA	87	70	26	99	7	5	1	0	0	1	1	0	1	0	0	0	72.4	1	26/7/2170 15:36:00	26/7/2170 15:05:25	2081.87	5262.16	2004.05	0	0	0	0	0	0	41.21	26.99	0	1.9	2.7	10	22	0.3	NA	NA	14.7	1.3	25.2
17442462	32257171	21621725	85	1	1	87.1	173	87	60	16	100	13	7	0	0	0	0	1	0	1	0	0	0	1007.5	1	23/8/2161 15:00:00	23/8/2161 11:19:15	3850.53	1034.09	-2118.39	1	440	0	0	1	215	237.17	48.69	0	1.2	5	12	45	2.2	NA	NA	15.9	1.4	36.1
17457907	33471878	20333619	72	1	1	68	168	119	62	16	100	6	6	1	1	0	0	0	0	1	0	0	0	91	1	18/10/2170 20:00:00	18/10/2170 18:30:05	-1188.04	-825	-215	1	100	1	400	0	0	NA	7.75	0	0.9	NA	27	41	0.7	NA	NA	15.7	1.5	64.8
17475174	39376409	27920977	57	2	1	51.3	183	81	92	18	78	2	3	1	0	0	0	0	0	0	0	0	0	316.42	1	24/11/2155 07:35:00	23/11/2155 23:20:00	3665	3818.12	964.95	1	10	1	800	1	120	NA	13.69	0	0.7	3.9	13	22	0.2	NA	NA	13.4	1.1	23.9
17475607	36446728	23304630	72	1	2	63.0333	178	123	83	26	99	4	8	0	0	0	1	1	0	0	0	0	0	59.23	1	16/4/2176 08:00:00	16/4/2176 04:49:52	199.8	1111.76	296.28	1	100	0	0	0	0	228.84	14.6	0	1.6	2.8	NA	NA	NA	NA	NA	10.7	1	34.1
17490822	30199016	28720765	48	2	2	86.5	160	80	94	19	92	12	7	0	0	0	0	1	0	0	8	1	1/6/2167 13:00:00	283	1	26/5/2167 19:00:00	26/5/2167 18:51:03	926.73	458.67	257.56	1	20	0	0	1	32	13.22	13.85	1	1.8	2.6	131	290	1	NA	NA	15	1.4	20.6
17514642	39236072	22144247	73	2	1	81.4	170	89	96	18	94	5	4	0	0	0	0	0	0	0	0	0	0	28.87	1	3/2/2142 11:08:00	30/1/2142 00:12:00	-707.41	-2945.92	-3910.1	0	0	0	0	0	0	NA	7.67	0	1.1	NA	NA	NA	NA	NA	NA	12.7	1.1	27.3
17538197	36660550	22950282	67	2	1	35	NA	109	70	25	94	4	3	0	0	0	0	0	0	0	0	0	0	86.97	1	12/12/2170 01:02:00	12/12/2170 00:35:00	-100	1151.15	1254.84	0	0	0	0	0	0	NA	7.71	0	0.8	NA	NA	NA	NA	NA	NA	10.2	0.9	26.8
17549038	39645876	27921706	57	1	1	123.7	178	87	108	19	91	5	3	0	0	0	1	0	0	0	0	0	0	272	1	8/6/2116 16:00:00	8/6/2116 14:18:25	-2555.2	-1657.06	-830.3	0	0	0	0	0	0	NA	16.94	0	1.1	3.7	41	35	0.6	NA	NA	13	1.2	34.1
17558408	37345966	27473241	69	2	1	81	NA	72	70	21	93	3	3	0	0	0	0	0	0	0	0	0	0	101.55	1	15/6/2130 18:38:00	15/6/2130 17:13:25	4496.62	-565	-1320	0	0	0	0	1	69	NA	28.81	0	0.9	2.9	25	29	0.9	NA	NA	10.5	1	30.2
17577224	31470584	21249027	64	2	1	56.6	175	108	78	31	92	9	5	1	0	0	0	0	1	0	0	0	0	112.28	1	7/3/2155 04:35:00	7/3/2155 03:54:00	2792.06	1235.38	903.66	1	100	0	0	1	68	NA	13.54	0	0.6	3.2	92	51	0.3	NA	NA	12.1	1.1	31
17584533	35010680	23218321	74	1	1	84.9	NA	108	104	17	93	5	8	0	1	0	1	1	0	0	0	0	0	83	1	22/2/2167 23:00:00	22/2/2167 20:52:00	-1255.88	-420	-400	1	200	0	0	1	622	20.23	20.94	1	1.3	3	193	216	0.3	NA	NA	11.2	1	25.6
17589153	30805473	21447262	83	2	1	67.4	NA	98	119	27	92	7	6	1	0	0	0	0	0	0	0	0	0	60	1	17/3/2166 00:00:00	16/3/2166 20:05:36	1700.69	96.32	-774.79	0	0	0	0	0	0	877.07	9.68	0	1.3	3.3	16	39	0.4	NA	NA	11.6	1.1	25.3
17607043	31696392	23082391	74	2	2	64.8	NA	94	95	30	96	3	8	0	0	0	0	1	0	0	0	0	0	85	1	14/6/2135 03:00:00	14/6/2135 02:44:32	161.3	336.25	-1035	0	0	0	0	0	0	NA	14.67	0	0.9	NA	NA	NA	NA	NA	NA	9.6	0.9	23.7
17608002	31096773	27322366	76	2	2	99.05	160	66	99	26	92	1	6	1	1	0	1	1	0	0	0	0	0	234.53	1	3/9/2145 01:00:00	3/9/2145 00:56:00	-3814.42	-680	-1500	0	0	0	0	0	0	132.02	25.69	0	1.4	NA	29	19	0.8	NA	NA	12.6	1.2	29.7
17608595	38023367	24610440	67	2	1	105.1	NA	79	77	24	99	10	5	1	1	0	1	1	0	0	0	0	0	82	1	9/7/2149 06:00:00	9/7/2149 04:23:00	1109.41	323.03	679.93	1	40	0	0	1	8	931.89	34.67	0	2.6	NA	29	34	0.7	NA	NA	21.1	1.9	71.3
17627463	38336278	23122908	74	2	1	77.6	155	93	91	29	86	1	7	1	0	0	0	0	0	0	0	0	0	305.85	1	14/2/2130 20:52:00	14/2/2130 20:17:00	99.8	196.75	559	1	110	0	0	0	0	17.24	14.92	1	0.8	NA	NA	NA	NA	NA	NA	11.6	1.1	25.4
17635417	32170688	24605263	65	1	1	115	NA	102	85	14	92	4	9	1	0	0	1	1	0	0	0	0	0	203.72	1	19/6/2123 17:00:00	19/6/2123 14:54:56	-1440	-706.49	-2460.64	1	20	0	0	1	60	NA	15.09	0	0.6	3.7	52	70	0.9	NA	NA	14.9	1.3	21.2
17684356	36370434	22118274	92	2	1	59.4	NA	94	64	25	96	6	6	1	0	0	1	0	0	0	0	0	0	44	1	7/7/2114 21:00:00	7/7/2114 20:38:00	-2664	-1660	-1035	0	0	0	0	0	0	3.18	3.47	1	1	NA	NA	NA	NA	NA	NA	16.6	1.5	46.3
17726225	34203168	25515402	73	1	2	131.2	178	89	77	18	96	4	7	0	0	0	1	1	0	1	0	0	0	76	1	14/3/2164 08:00:00	13/3/2164 14:41:13	-285	115	291.5	1	10	0	0	0	0	312.32	15.06	0	3.3	3.7	NA	NA	NA	NA	NA	54.3	6	40.6
17735110	36543828	26225218	60	2	1	74	165	117	58	29	99	7	5	0	0	0	1	1	0	0	0	0	0	324	1	30/3/2128 08:00:00	30/3/2128 04:22:00	3445.54	8.35	103.15	0	0	0	0	1	84	NA	18.62	0	0.9	2.4	14	30	0.7	NA	NA	13.5	1.2	38.7
17746269	37844368	25211001	85	1	2	74.55	173	110	79	23	100	13	8	0	0	0	1	1	0	0	0	0	0	134.78	1	5/10/2171 18:08:00	5/10/2171 05:29:00	2415.07	1801.34	-825	0	0	0	0	1	128	NA	8.45	0	1.4	2.8	115	120	7.2	NA	NA	14.6	1.4	26.3
17756561	35990576	23503313	77	2	2	94.8	160	83	72	31	94	4	5	0	0	0	1	1	0	0	0	0	0	177	1	27/4/2166 19:00:00	27/4/2166 18:22:00	178.35	-611.29	236.75	1	202.5	0	0	1	16	13.29	13.78	1	1.1	3.4	11	35	0.3	NA	NA	12.6	1.2	32.5
17762094	34787715	27543995	73	2	2	64.2	155	98	113	26	96	4	7	0	0	0	0	0	0	0	0	0	0	163	1	2/4/2188 09:00:00	2/4/2188 07:03:20	2443.22	496.53	317.55	1	290	0	0	1	8	NA	14.35	0	1	NA	NA	NA	NA	NA	NA	12	1.1	23.8
17763770	31555340	22223992	64	1	1	91	178	86	87	17	95	4	5	0	1	0	1	0	0	0	0	0	0	79.57	1	24/10/2165 06:00:00	24/10/2165 05:48:00	2195	1296.97	-2975.34	1	45	0	0	1	60	NA	10.42	0	0.8	3.1	29	32	0.4	NA	NA	11.5	1.1	26.4
17766862	34482086	26235729	81	1	2	69.4667	170	69	74	27	96	13	7	1	0	0	1	1	0	0	0	0	0	105	1	17/5/2137 23:00:00	17/5/2137 17:18:00	1893.38	2481.9	-950.89	1	80	0	0	0	0	6.36	6.85	1	1.7	NA	12	38	0.5	NA	NA	12.5	1.1	28.7
17781151	31185851	26206157	92	2	1	67.6	163	94	79	22	95	8	8	1	0	0	1	0	0	1	0	0	0	84	1	5/3/2178 23:00:00	5/3/2178 20:24:35	-1095	940	717	0	0	0	0	0	0	NA	8.17	0	1.2	NA	NA	NA	NA	NA	NA	NA	NA	NA
17781298	33342826	22943320	89	2	1	56.3	NA	74	79	18	98	3	6	1	0	0	0	0	0	0	0	0	0	330.52	1	28/5/2127 21:29:00	28/5/2127 21:12:00	-299.8	1481.78	1170.29	0	0	0	0	0	0	15.18	14.85	1	0.6	3	49	33	NA	NA	NA	12.9	1.2	25.9
17792208	39236672	29695259	70	2	1	50	163	59	81	15	100	6	6	0	0	0	0	1	0	0	0	0	0	51.73	1	16/4/2123 20:16:00	16/4/2123 19:59:17	1561.34	-1071.5	-2170	0	0	0	0	0	0	NA	5.74	0	2.9	3.4	762	1127	0.5	NA	NA	21	2	150
17803498	38243014	23758169	85	2	1	88.2	NA	110	67	22	98	3	6	1	0	0	1	0	0	0	0	0	0	94.07	1	27/1/2181 22:00:00	27/1/2181 20:39:00	-262.5	-607	-1190	0	0	0	0	0	0	17.22	6.98	1	0.8	2.8	NA	NA	NA	NA	NA	13.1	1.1	35.9
17806475	37807704	25425740	60	2	2	68	152	75	70	17	100	21	7	1	1	0	0	1	0	0	4	1	12/12/2149 14:00:00	36.88	1	10/12/2149 16:00:00	10/12/2149 15:55:24	8240.36	266.84	2966.3	1	260	0	0	1	8	NA	19.11	0	1.5	2.7	1540	2936	21.6	NA	NA	26	2.4	34.3
17853271	39917383	25905004	81	2	1	96.9	159	75	68	24	94	6	13	0	1	0	1	0	0	0	0	0	0	126.7	1	24/1/2151 00:18:00	23/1/2151 23:59:55	-3920	-562	-355.57	1	25	0	0	0	0	NA	11.69	0	2.1	3.3	41	26	0.4	NA	NA	14	1.2	23.9
17871820	39866919	27245553	55	2	1	78	168	114	100	37	92	5	7	1	1	0	0	1	1	0	0	0	0	194.17	1	20/9/2146 07:00:00	19/9/2146 19:53:33	4025	2166.03	2992.79	1	50	0	0	1	76	1150.32	33.05	0	0.7	2.8	48	130	1.4	NA	NA	18.7	1.7	32.8
17883038	39855396	22348650	85	1	1	68.9333	175	108	58	26	94	8	6	1	0	0	0	1	1	0	0	0	0	240.83	1	14/5/2132 06:10:00	14/5/2132 05:49:00	3727.17	490	325	0	0	0	0	0	0	NA	25.35	0	1.2	2.2	36	54	2.2	NA	NA	13.3	1.2	38
17900533	36000427	20463954	81	1	2	NA	NA	79	99	18	100	9	6	0	0	0	1	1	0	0	0	0	0	24.65	1	26/12/2148 11:30:00	24/12/2148 03:05:13	3166.02	875.9	-500.7	1	45	0	0	1	8	58.87	22.62	0	1.5	2.9	10	17	0.4	NA	NA	14.4	1.2	30.8
17904720	36031611	27311470	88	1	2	63.1	152	73	69	21	97	8	7	1	0	0	1	1	1	1	0	0	0	170.03	1	21/8/2126 07:10:00	21/8/2126 05:21:00	-450	-1500	-539.97	1	51	0	0	0	0	1808.82	12.46	0	1.3	2.6	28	46	0.3	NA	NA	18.4	1.7	47.7
17909008	30903671	25991970	60	1	1	60.5	NA	107	110	25	99	7	4	1	0	0	0	0	0	0	0	0	0	100	1	21/3/2156 20:00:00	21/3/2156 17:22:07	4168.87	-520.36	-4440	1	120	0	0	1	68	2449.28	8.98	0	0.6	3.3	29	39	0.5	NA	NA	12.3	1.1	35.6
17923746	31079581	25878929	92	2	1	63.2333	NA	61	77	21	98	2	7	1	1	0	1	1	0	0	0	0	0	52.7	1	24/11/2122 11:18:00	23/11/2122 08:21:00	-777.35	492.53	-166.33	1	180	0	0	0	0	44.71	7.2	0	1.5	NA	NA	NA	NA	NA	NA	NA	NA	NA
17955642	35943179	27285616	70	1	1	73.5	165	106	101	21	97	7	9	0	1	0	1	1	0	0	5	1	9/5/2152 00:00:00	164.65	1	5/5/2152 14:39:00	5/5/2152 13:20:06	620.85	1196.82	1519.23	0	0	0	0	1	16	530.29	34.95	0	4.8	2.7	19	26	0.2	NA	NA	14.8	1.4	25.3
17955848	37873993	27469367	57	2	1	119.9	152	94	83	17	98	10	4	1	0	0	0	1	0	0	0	0	0	95.75	1	4/11/2175 11:00:00	4/11/2175 07:00:05	5357.65	4791.88	257.85	1	40	0	0	1	8	NA	31.41	0	2	2.4	3286	4103	0.3	NA	NA	13.3	1.2	28.3
17965724	33302177	29438104	58	2	2	149	165	95	105	19	98	4	3	0	0	0	1	0	0	0	0	0	0	115.38	1	25/5/2155 12:37:00	25/5/2155 10:18:00	-3085.6	-1401.4	-1337.24	1	250	0	0	0	0	NA	6.27	0	0.6	NA	25	19	0.4	NA	NA	12.3	1.1	25.5
17982140	37884255	25012178	71	1	1	71	NA	120	53	30	85	7	10	1	0	0	0	0	0	0	0	0	0	36	1	20/1/2166 20:00:00	19/1/2166 14:42:00	245	-740	-1333.82	0	0	0	0	0	0	2.46	3.08	1	1.5	NA	64	74	0.3	NA	NA	15.2	1.3	24.1
17995511	36427208	23937309	58	1	2	70	173	82	79	20	100	7	5	1	0	0	1	0	0	0	0	0	0	112.28	1	10/7/2145 07:43:00	10/7/2145 07:34:00	553.58	196.21	-1248.17	0	0	0	0	0	0	NA	6.33	0	1.2	NA	68	46	0.6	NA	NA	13.7	1.2	25.1
17997256	35335290	25295180	55	1	1	117.4	183	87	58	7	99	7	3	0	0	0	0	1	0	0	0	0	0	213.17	1	10/8/2117 18:50:00	10/8/2117 18:48:43	1331.3	3018.16	3480.04	0	0	0	0	1	60	NA	15.25	0	1.1	3	16	24	0.5	NA	NA	15.2	1.3	28.3
18017704	36500380	24991618	55	2	2	84.5	163	98	76	24	94	5	4	0	1	0	1	0	0	0	0	0	0	30	1	1/7/2184 13:00:00	24/6/2184 17:08:37	-1107.81	1205.21	-1113.33	0	0	0	0	1	8	NA	10.24	0	0.4	3.2	15	13	NA	NA	NA	12.2	1.1	30.8
18037264	34355417	25914792	81	1	2	92.45	178	63	72	17	98	11	6	1	0	0	1	1	0	0	0	0	0	250	1	28/12/2148 02:00:00	28/12/2148 01:38:00	-1538.82	-1564.08	-861.69	1	200	0	0	1	8	NA	14.78	0	1.2	NA	87	59	0.7	NA	NA	13.3	1.2	28.8
18078692	35047635	26545545	67	2	2	106.9	157	164	65	27	96	17	11	0	1	0	1	1	1	0	13	1	17/7/2184 21:10:00	165.42	1	12/7/2184 16:00:00	12/7/2184 15:51:36	15874.7	1772.72	-121.47	1	325	0	0	1	898	20.34	20.46	1	1.8	4.1	27	59	5.1	NA	NA	27.9	2.6	28.3
18115844	33833497	28934899	58	2	1	61.1	NA	112	83	14	98	8	3	1	0	0	0	0	1	0	0	0	0	0.32	1	30/12/2129 16:00:00	29/12/2129 18:33:39	-840	-1590	-1795	1	705	0	0	1	8	40.17	40.49	0	0.8	3	17	28	24.8	NA	NA	21.3	1.9	33.2
18139479	38141957	23911112	80	1	1	69.45	NA	133	82	22	95	4	4	0	0	0	0	0	0	0	0	0	0	298.7	1	24/10/2152 20:48:00	24/10/2152 12:11:23	1477.08	3759.98	442.76	0	0	0	0	0	0	16.46	16.98	1	1	3	81	48	0.6	NA	NA	10.9	1	30.3
18140921	32180239	28383486	68	2	1	75.1	NA	76	64	27	100	3	3	0	0	0	0	0	0	0	0	0	0	116.63	1	6/8/2129 00:00:00	5/8/2129 23:56:00	-578.4	297.58	-2361.09	1	100	0	0	0	0	NA	7.87	0	0.7	2.4	12	12	0.1	NA	NA	11.9	1.1	80
18158194	33725667	20601863	66	2	1	104	157	124	83	28	90	7	7	0	0	0	1	1	0	0	0	0	0	192.03	1	25/7/2135 22:00:00	25/7/2135 21:32:00	914.3	1600	454.17	0	0	0	0	0	0	9.17	9.36	1	1.6	NA	NA	NA	NA	NA	NA	14.3	1.2	32.5
18158494	38402192	21941169	60	2	2	56.2667	157	96	75	17	100	1	4	0	1	0	0	0	0	0	0	0	0	78	1	6/6/2121 18:00:00	6/6/2121 17:43:46	2494.01	-3566	-1319	0	0	0	0	0	0	NA	6.1	0	0.3	NA	25	21	0.4	NA	NA	12.9	1.1	22.4
18163289	32985137	25372752	81	2	2	113.65	152	72	102	13	100	7	7	1	1	0	1	0	0	1	0	0	0	174.78	1	19/10/2148 08:03:00	19/10/2148 07:53:00	-1788.06	-1444.01	-3063.75	1	100	0	0	1	8	NA	13.58	0	1.1	NA	59	35	0.7	NA	NA	60.3	5.4	35.8
18165455	36749462	29490255	77	1	1	86.4	168	52	74	17	96	2	10	0	1	0	1	1	0	1	0	0	0	89.85	1	29/1/2133 20:09:00	29/1/2133 00:59:14	3223.76	279.47	-1309.54	0	0	0	0	0	0	116.96	54.56	0	1.3	2.7	14	32	0.3	NA	NA	11.4	1.1	25.2
18218394	30575218	23370555	53	1	2	94.5	165	102	77	26	97	6	8	0	1	0	0	1	0	0	0	0	0	248.32	1	21/10/2163 09:30:00	20/10/2163 21:51:00	1141.97	4852.19	-772.42	1	15	0	0	1	60	NA	14.84	0	2.3	3.3	51	143	0.2	NA	NA	13.9	1.2	32.2
18257430	31521446	23218450	71	2	1	76.1	160	118	73	18	89	4	4	0	0	0	0	0	0	0	0	0	0	194.97	1	5/5/2118 00:41:00	4/5/2118 21:35:05	-1436.83	160	-1115	1	30	0	0	1	8	NA	25.76	0	0.6	3	22	28	0.3	NA	NA	13.9	1.2	35.8
18299579	35197166	20879980	64	1	2	113.8	180	79	66	19	91	15	3	1	0	0	0	1	0	0	0	0	0	365.98	1	24/7/2125 04:00:00	24/7/2125 03:49:51	2753.59	-184.3	-2611.27	1	110	0	0	1	158	NA	30.34	0	1.9	2.7	15	30	0.4	NA	NA	10.3	0.9	32.2
18310043	37842443	24685671	65	2	1	145	NA	91	108	30	98	5	8	0	0	0	0	1	0	0	0	0	0	154.63	1	6/6/2168 05:22:00	6/6/2168 02:55:46	2078.27	-15.67	-170.85	1	45	0	0	0	0	NA	10.59	0	1.4	NA	NA	NA	NA	NA	NA	10.5	1	27.8
18326767	35104742	27473223	61	2	1	115.1	NA	69	77	17	94	2	5	0	1	0	1	1	0	0	0	0	0	60.52	1	7/8/2164 22:00:00	7/8/2164 17:40:00	75.08	190	750	0	0	0	0	1	8	17.32	17.84	1	0.8	NA	9	24	0.5	NA	NA	12.2	1.1	30.3
18329161	30340136	26660266	70	2	1	45.85	152	95	60	19	80	7	5	0	0	0	1	1	0	0	0	0	0	73	1	11/9/2197 19:00:00	11/9/2197 17:42:00	3040.17	185	15	1	1	0	0	1	8	1204.35	15.87	0	2	NA	16	19	1.2	NA	NA	15.2	1.4	27.2
18335227	31977743	27213412	48	2	2	85.1	NA	124	74	32	95	8	2	0	0	0	0	1	0	0	0	0	0	237	1	26/2/2132 20:00:00	26/2/2132 17:08:50	8376.93	2543.27	-1704.56	1	100	0	0	1	8	NA	11.93	0	1.1	2.4	32	74	0.2	NA	NA	14.6	1.3	33.9
18356938	31262175	27508451	83	2	1	81.3	152	83	124	17	93	5	6	1	0	0	1	1	0	0	0	0	0	195.17	1	9/6/2180 18:50:00	9/6/2180 15:13:24	5584.53	-3165	-986.49	0	0	0	0	1	16	655.38	18.09	0	1	2.9	16	20	0.3	NA	NA	16	1.4	49
18362343	39539737	26836087	89	1	2	41.6	NA	66	62	14	94	10	8	0	0	0	1	1	0	0	0	0	0	14	1	27/12/2180 20:00:00	23/12/2180 21:21:48	425.58	2344.18	-997.23	0	0	0	0	0	0	4.11	4.23	1	2.2	NA	22	20	1.2	NA	NA	12.7	1.2	24.3
18362719	38320313	22962765	67	1	1	112.8	183	105	77	15	95	6	4	1	1	0	0	0	0	0	0	0	0	151.08	1	10/4/2146 13:02:00	10/4/2146 12:53:13	-495.9	2566.7	737.96	0	0	0	0	1	68	NA	10.14	0	0.9	3.2	133	83	6.7	NA	NA	12.3	1	25.9
18384164	31111720	25732435	63	1	1	125.5	178	86	72	19	100	7	6	0	1	0	0	1	0	0	0	0	0	72.18	1	20/11/2154 23:00:00	20/11/2154 22:17:03	2345.55	-360.65	-155	0	0	0	0	1	120	NA	8.7	0	1.8	NA	NA	NA	NA	NA	NA	12.8	1.1	27.2
18385602	38698140	20217800	62	1	2	66.7	180	51	76	17	98	2	4	0	0	0	0	0	0	0	0	0	0	242.5	1	16/7/2183 02:39:00	15/7/2183 05:45:00	2182.59	6684.25	950	1	104	0	0	1	77	NA	34.62	0	1	3.3	63	134	0.3	NA	NA	15.9	1.4	150
18391972	32201021	20535558	56	2	2	68.7333	160	86	76	30	100	4	3	0	0	0	1	0	0	0	0	0	0	402.93	1	23/7/2128 16:04:00	23/7/2128 15:30:26	1733.57	-906.64	-2661.1	1	280	0	0	0	0	NA	16.88	0	0.5	3.6	40	28	0.2	NA	NA	9.8	0.9	21.7
18392349	31900037	23693162	73	2	1	63	157	59	51	17	100	6	7	0	0	0	0	1	0	0	0	0	0	80.22	1	10/2/2176 09:00:00	9/2/2176 03:15:39	-471.66	310.55	-876	1	140	0	0	1	0.5	50.86	21.56	0	1.5	2.4	12	21	0.5	NA	NA	19.5	1.8	60.1
18426782	39114385	25816541	62	2	2	108	155	46	106	23	99	4	5	0	0	0	0	1	0	1	0	0	0	94	1	8/10/2118 14:00:00	8/10/2118 13:13:00	-733.12	-1771.47	-2308.68	1	140	0	0	1	8	NA	11.29	0	1.6	NA	NA	NA	NA	NA	NA	12.5	1.2	28.2
18431965	31607088	22007233	89	1	2	60	NA	86	79	28	100	5	7	0	0	0	0	1	0	1	0	0	0	67	1	10/8/2184 17:00:00	10/8/2184 08:05:00	-2582.15	-885	-1110	1	40	0	0	0	0	288.75	13.46	0	1.6	NA	NA	NA	NA	NA	NA	NA	NA	NA
18440573	37020565	21009823	72	1	2	113.7	178	125	70	24	99	9	5	1	1	0	0	1	0	1	0	0	0	395.55	1	5/10/2156 01:00:00	5/10/2156 00:23:00	7500.17	3696.85	757.52	0	0	0	0	1	84	NA	32.64	0	1.9	NA	92	80	0.6	NA	NA	13.6	1.3	22.7
18470025	32925236	20060499	46	1	2	149.8	183	82	91	24	94	11	2	1	1	0	0	0	0	0	0	0	0	4.28	1	17/11/2179 00:00:00	7/11/2179 14:14:00	-73.95	277.88	-1626.37	0	0	0	0	1	32	98.48	11.08	0	0.9	3.5	19	13	0.4	NA	NA	15.3	1.4	30.7
18495283	33229559	26978248	67	2	1	49.5	157	114	87	13	100	10	4	1	0	0	0	0	0	0	0	0	0	64	1	29/6/2154 07:00:00	29/6/2154 06:38:00	2380.97	931.08	352.06	0	0	0	0	1	8	8.79	3.69	1	0.8	3.2	56	91	0.8	NA	NA	12.5	1.2	28.6
18547656	36797645	25212700	52	2	2	145.067	152	95	95	26	99	4	2	1	0	0	0	0	0	0	0	0	0	58.42	1	18/5/2132 20:00:00	18/5/2132 05:20:00	-109	555	110	1	110	0	0	0	0	NA	6.49	0	0.8	NA	NA	NA	NA	NA	NA	NA	NA	NA
18577525	34043462	27322690	77	2	2	61.3	NA	93	99	20	100	7	5	1	1	0	0	0	0	0	0	0	0	27.5	1	17/8/2188 12:30:00	14/8/2188 20:31:00	-736.15	-2759.79	-84.11	1	90	0	0	0	0	1345.19	7.9	0	0.9	NA	NA	NA	NA	NA	NA	12.5	1.1	27.7
18588532	31552951	25313300	80	1	1	70	173	112	88	35	94	3	7	0	0	0	0	0	0	0	0	0	0	131.88	1	26/5/2152 00:03:00	25/5/2152 23:35:09	1111.67	1412	999.3	0	0	0	0	0	0	110.36	6.95	0	0.5	3	NA	NA	NA	NA	NA	14.2	1.2	27.7
18603738	38228989	21550356	68	1	1	109.9	183	74	65	32	99	8	9	0	0	0	1	1	0	0	0	0	0	68.63	1	16/5/2159 20:00:00	16/5/2159 08:51:00	1950.68	-2713.93	-2314.63	0	0	0	0	1	8	17.78	12.32	1	2.8	3.7	19	36	0.2	NA	NA	12.4	1.1	40.7
18606614	37109435	29258591	93	1	1	87.5	175	79	114	17	95	3	10	0	0	0	1	0	0	0	0	0	0	24	1	13/12/2145 12:00:00	11/12/2145 09:19:46	-24.83	440	-545	0	0	0	0	0	0	NA	8.68	0	1.3	NA	NA	NA	NA	NA	NA	14.8	1.4	28.7
18625915	34208107	22190291	93	1	2	66.2	NA	107	98	22	94	5	9	0	1	0	0	1	0	0	0	0	0	171	1	1/9/2180 16:00:00	31/8/2180 22:22:17	-879.79	-435	520	0	0	0	0	0	0	13.95	11.63	1	1.5	NA	NA	NA	NA	NA	NA	28.5	2.6	31.1
18631629	39417457	22866554	56	2	1	78.6	157	91	66	21	93	4	8	0	1	0	1	0	0	0	0	0	0	25	1	7/8/2113 01:00:00	7/8/2113 00:40:50	-940	-1825	-430	0	0	0	0	0	0	70.23	12	0	0.6	2.7	14	18	0.4	NA	NA	11.5	1.1	25.6
18653828	33750354	21577787	89	2	1	90.9	160	80	55	7	100	6	6	1	0	0	0	0	0	0	0	0	0	204.38	1	13/3/2186 03:00:00	12/3/2186 23:05:33	7960.6	-1651.73	-2116.63	0	0	0	0	1	252	8.11	8.91	1	0.6	2.8	15	41	0.6	NA	NA	21.3	2	40.7
18659491	39470604	29922231	72	1	1	70.8	NA	113	60	29	99	6	7	1	0	0	1	1	0	0	0	0	0	65.28	1	13/10/2135 20:17:00	13/10/2135 19:37:00	1510.08	360.42	1803	1	40	0	0	0	0	29.21	22.88	0	1.8	3.4	49	82	2.6	NA	NA	16.2	1.5	41.6
18697788	32188304	26628227	85	2	1	52.4	170	146	87	16	96	9	6	1	0	0	0	0	0	0	0	0	0	128	1	12/7/2116 22:00:00	12/7/2116 21:43:00	4437.58	1264.44	1635.5	0	0	0	0	1	8	99.16	5.83	0	0.9	2.4	42	78	0.5	NA	NA	15	1.4	29.3
18713077	31284129	28057945	80	1	2	88.7	NA	84	124	29	91	2	7	1	0	0	0	0	0	0	0	0	0	32.68	1	15/1/2140 23:00:00	15/1/2140 21:58:52	2393.73	-2131.62	-2560.08	0	0	0	0	1	8	NA	8.78	0	0.9	2.5	9	14	0.7	NA	NA	13.3	1.2	23.5
18714913	33636263	24604345	82	2	1	33.8	NA	118	74	27	99	1	8	1	0	0	0	0	0	0	0	0	0	30.27	1	17/10/2154 09:47:00	16/10/2154 22:52:00	620	-1215	90	1	10	0	0	0	0	NA	13.05	0	0.4	NA	NA	NA	NA	NA	NA	12.4	1	27.1
18723992	34250914	20622118	74	1	2	96	172.72	61	64	21	100	6	4	0	0	0	0	0	0	0	0	0	0	142	1	2/4/2121 23:00:00	2/4/2121 23:00:00	2410.89	1497.62	629.24	0	0	0	0	1	8	NA	16.91	0	1.3	3.5	24	34	1.1	NA	NA	14.6	1.4	24.2
18728446	37341611	28541092	82	1	1	116.4	185	68	103	19	94	1	5	1	0	0	0	0	0	0	0	0	0	216.42	1	17/7/2182 21:35:00	17/7/2182 19:32:47	776.6	976.17	-4220	0	0	0	0	1	108	NA	32.77	0	1.2	NA	53	101	1.1	NA	NA	12.5	1.2	30.5
18734362	39771014	23338056	60	2	1	76.4	160	88	95	16	96	7	2	1	0	0	0	0	0	0	0	0	0	193	1	18/9/2135 14:00:00	18/9/2135 13:21:00	3003.9	4336.97	1040.1	1	40	0	0	0	0	NA	12.23	0	0.6	NA	105	133	0.1	NA	NA	11.4	1.1	25.3
18779399	36730668	27565247	80	1	1	59.2	168	146	91	26	100	1	8	0	0	0	1	0	0	0	0	0	0	40.17	1	18/10/2167 00:35:00	18/10/2167 00:01:00	-2845	-185	-640	1	50	0	0	0	0	463.06	11.69	0	1.1	2.8	13	24	0.3	NA	NA	13.6	1.2	27.8
18806652	36970219	27184121	85	2	2	74.5	152	106	125	15	100	8	8	1	1	0	0	1	0	0	0	0	0	118.05	1	11/3/2208 00:00:00	10/3/2208 23:45:59	1388.09	2303.08	-612.81	0	0	0	0	1	66	26.54	9.1	1	1.6	NA	10	16	0.5	NA	NA	13.4	1.2	51.4
18840615	31623944	24023051	76	2	1	35	NA	118	103	21	100	3	4	0	0	0	0	0	0	0	0	0	0	157	1	31/3/2168 00:00:00	30/3/2168 22:51:51	3167.46	-878.08	-638.52	0	0	0	0	0	0	30.05	8.88	0	0.6	NA	22	42	0.2	NA	NA	11.8	1	31.6
18853579	35813715	22220491	85	2	2	76.45	168	88	118	28	92	8	9	0	0	0	1	1	0	0	0	0	0	57.27	1	25/12/2183 04:29:00	25/12/2183 04:09:00	2539.5	-400	-255	1	10	0	0	0	0	NA	7.42	0	2	NA	NA	NA	NA	NA	NA	69.4	6.6	43.5
18894010	33068787	20966051	67	2	1	56.55	NA	123	89	23	100	1	3	0	0	0	0	0	0	0	0	0	0	72	1	26/7/2172 13:00:00	26/7/2172 11:49:05	-65	179	590	1	10	0	0	0	0	NA	8.21	0	0.8	4.1	19	21	0.4	NA	NA	13.1	1.1	27.3
18917458	30704530	28038802	72	1	1	104	NA	145	90	39	89	11	5	1	0	0	1	0	0	0	0	0	0	169.25	1	15/12/2185 03:45:00	15/12/2185 01:31:00	1299.37	-601	-1996.53	1	130	0	0	0	0	88.99	7.71	0	0.7	NA	19	17	0.3	NA	NA	12.6	1.1	33.5
18919264	37186991	22123258	71	2	1	55.1	152	98	86	26	95	5	6	0	0	0	1	0	0	0	0	0	0	77	1	13/12/2189 19:00:00	13/12/2189 18:57:38	-3253	-412.12	-1768.24	0	0	0	0	0	0	NA	5.76	0	0.8	3.4	36	28	0.4	NA	NA	12.2	1.1	51
18927062	39203865	22215124	92	1	1	84	NA	107	69	21	95	8	7	1	0	0	0	1	0	0	0	0	0	72	1	18/9/2179 00:00:00	17/9/2179 23:17:18	-1300.91	-852.7	-14.17	1	140	0	0	1	68	74.03	6.67	0	1.4	NA	19	78	1.9	NA	NA	18.4	1.7	32.9
18987520	31993678	23287127	70	2	1	81.5	163	71	113	17	97	9	7	0	0	0	1	1	0	0	0	0	0	21.37	1	28/12/2163 06:38:00	28/12/2163 06:26:00	1423.29	1964.31	2471.91	1	4	0	0	1	8	NA	16.59	0	1.1	2.8	2371	402	1.4	NA	NA	17.2	1.6	27.5
19001109	35853996	24079321	90	1	2	70	163	75	67	15	93	9	7	1	0	0	0	0	0	0	0	0	0	79.98	1	24/6/2124 04:01:00	23/6/2124 23:30:35	5476.14	-2635.43	-2875	1	40	0	0	1	8	NA	6.79	0	0.6	NA	11	20	0.8	NA	NA	13.8	1.3	43.2
19007208	36766483	22794208	88	2	1	41	147	82	66	20	99	3	5	1	0	0	0	0	0	0	0	0	0	172.7	1	26/9/2135 02:00:00	26/9/2135 01:39:00	1026.75	-66.24	1152.84	1	30	0	0	0	0	8.03	8.51	1	0.5	NA	NA	NA	NA	NA	NA	12.7	1.1	28.6
19011257	36660398	25654517	67	1	1	133.25	NA	68	63	18	100	4	6	0	1	0	1	0	0	0	0	0	0	36	1	1/1/2152 22:00:00	30/12/2151 17:28:11	73.19	-1852.98	-1252	0	0	0	0	1	60	226.06	16.7	0	0.9	NA	NA	NA	NA	NA	NA	16.5	1.5	27.8
19035431	31214569	29983439	72	2	2	77.75	165	79	75	21	91	4	8	0	1	0	1	1	0	0	0	0	0	285.35	1	8/11/2198 17:39:00	8/11/2198 17:23:00	6057.81	-2415.75	-1455	0	0	0	0	1	368	11.31	11.98	1	1	NA	NA	NA	NA	NA	NA	31.1	2.9	41.5
19056479	36833608	26041144	70	2	1	82.95	155	117	125	27	98	2	5	0	1	0	0	0	0	0	0	0	0	90	1	20/9/2135 20:00:00	20/9/2135 10:07:11	490	-1060	-2367.5	1	220	0	0	0	0	36.32	12.03	0	0.5	NA	NA	NA	NA	NA	NA	11.6	1.1	32.3
19063358	32987841	20804902	58	1	1	75.1	183	106	6116	16	92	14	6	0	0	0	0	1	1	0	0	0	0	14.73	1	17/1/2154 18:43:00	17/1/2154 16:14:31	1340.98	-1713.61	-2686.04	1	55	0	0	1	76	NA	38.93	0	3.2	4.2	14	32	2.2	NA	NA	28	2.5	50.5
19087907	30101365	21709573	70	2	2	90.0333	157	83	108	13	98	8	6	0	0	0	1	1	1	0	0	0	0	130	1	25/8/2185 08:00:00	25/8/2185 03:08:00	5236.7	-123.5	-3797.6	0	0	0	0	1	16	NA	21.81	0	0.6	3.1	50	102	0.7	NA	NA	13.2	1.2	26.1
19097545	37224782	25204521	77	1	2	90.2	178	69	64	15	99	9	6	0	0	0	1	1	0	0	0	0	0	135.02	1	17/5/2122 00:00:00	16/5/2122 23:22:48	1671.82	491.72	-666.56	0	0	0	0	1	8	13.03	13.03	1	1.3	2.7	101	79	1.1	NA	NA	13.2	1.2	150
19103929	31859355	22425022	78	2	2	48	152	80	159	17	96	6	5	1	0	0	1	0	0	0	0	0	0	218	1	22/9/2141 10:00:00	18/9/2141 21:20:00	5133.97	-1217.61	-1517.89	1	84	0	0	1	60	293.15	19.83	0	0.5	3.4	42	60	0.3	NA	NA	11	1	28.5
19122740	32492679	21527882	65	1	2	91.5	178	124	125	18	100	7	6	0	1	0	0	0	0	0	0	0	0	80.92	1	8/2/2187 05:00:00	8/2/2187 04:30:00	119.64	138.53	-1978.59	1	10	0	0	1	66	NA	11.57	0	0.8	3.5	45	54	1	NA	NA	15.2	1.4	31.3
19137317	38322223	22756411	59	1	1	115.2	175	85	88	31	93	12	4	1	0	0	0	1	0	0	0	0	0	162	1	14/1/2167 23:00:00	14/1/2167 22:41:00	-818.56	382.41	354.32	0	0	0	0	0	0	NA	18.84	0	1.8	2.6	2129	1814	3.6	NA	NA	27.6	2.5	37.2
19151064	31940077	21394199	65	1	2	122.7	193	81	84	24	90	6	6	0	0	0	0	1	0	0	0	0	0	66.73	1	22/12/2147 21:16:00	22/12/2147 19:59:19	-745	-920	-2189.53	0	0	0	0	0	0	1172.29	4.93	0	2.5	NA	14	12	0.1	NA	NA	36.3	3.7	38.9
19152929	33042587	29767176	55	2	1	61.3	155	83	102	25	100	7	4	1	1	0	1	0	0	0	0	0	0	217.5	1	7/2/2186 02:30:00	6/2/2186 22:55:35	1644.8	2063.1	211.24	1	140	0	0	0	0	173.05	12.8	0	0.9	3.2	34	28	0.6	NA	NA	12.7	1.1	26.6
19176597	38914211	21458341	70	1	1	116	178	94	54	19	97	12	7	0	0	0	0	1	1	0	2	1	12/6/2114 20:20:00	62	1	10/6/2114 10:00:00	10/6/2114 09:32:49	-357.17	-1796.13	8029.48	1	50	0	0	1	548	17.91	18.42	1	2.4	NA	32	28	9.4	NA	NA	25.5	2.4	55.3
19191389	36756843	27217986	67	2	1	153.85	170	121	78	17	96	2	6	0	0	0	1	1	0	0	0	0	0	171.78	1	3/3/2129 04:09:00	3/3/2129 03:45:00	1155.55	-383.72	-2263.46	1	120	0	0	0	0	28.89	27.43	0	1.8	2.8	15	20	0.7	NA	NA	23.3	2.2	32.7
19191576	39044877	27005235	60	2	1	128	NA	90	83	11	89	3	2	1	0	0	0	0	0	0	0	0	0	0	0	0	7/11/2164 05:01:00	1960	-975	-500	0	0	0	0	0	0	1815.84	20.46	0	0.8	3.3	15	29	0.8	NA	NA	15.2	1.3	84.9
19213219	31033206	28013717	65	2	2	95.55	157	98	86	19	89	1	5	1	1	0	1	1	0	0	0	0	0	91.4	1	6/4/2169 20:36:00	6/4/2169 17:08:48	-1325	485	545	0	0	0	0	0	0	NA	6.14	0	1	3.5	NA	NA	NA	NA	NA	46.4	4.9	31.4
19275650	38104886	20019785	82	2	1	113.3	NA	98	59	16	100	4	8	0	0	0	0	0	0	0	0	0	0	248	1	19/1/2166 20:00:00	19/1/2166 16:46:12	3027.42	581.43	-519.9	0	0	0	0	1	50	NA	27.96	0	0.6	NA	23	22	0.3	NA	NA	13.2	1.2	30.8
19295262	32823907	21842517	71	1	1	76.6	NA	90	67	35	97	6	7	0	0	0	0	1	0	0	0	0	0	71.28	1	8/11/2128 00:43:00	8/11/2128 00:02:00	1641.53	1771.5	-1129.53	0	0	0	0	0	0	709.05	7.67	0	1	NA	NA	NA	0.4	NA	NA	15.9	1.4	31.7
19296173	37404072	22452822	75	2	1	93.5	NA	96	71	23	91	4	11	0	1	0	1	1	0	0	0	0	0	59	1	1/2/2188 19:00:00	1/2/2188 15:26:00	-837	-1144.83	-1145	1	140	0	0	0	0	NA	8.07	0	2	NA	37	41	0.3	NA	NA	11.1	1	30.6
19298732	38521786	28878302	66	2	2	104.3	NA	105	86	13	92	6	7	0	1	0	1	1	0	0	0	0	0	56.18	1	19/4/2165 17:00:00	19/4/2165 16:42:00	-526.06	-1658.49	-365.43	1	45	0	0	0	0	34.38	20	0	2.2	3.6	20	12	0.3	NA	NA	23.9	2.3	150
19348675	36495928	21384951	83	1	1	82.4	NA	57	74	34	97	2	6	1	1	0	0	0	0	0	0	0	0	67.5	1	18/3/2123 20:30:00	18/3/2123 10:39:35	70	-93.5	33.83	1	12	0	0	0	0	NA	13.71	0	0.8	3	16	28	0.3	NA	NA	12.8	1.2	27.7
19361192	37803094	20915033	55	2	2	114	165	100	72	13	93	1	3	1	1	0	0	1	0	0	18	1	15/4/2125 15:40:00	721	1	1/4/2125 10:00:00	1/4/2125 07:52:00	-741.25	960	-860	1	6	0	0	1	366	30.82	31.66	0	0.6	2.6	17	12	0.4	NA	NA	12.8	1.2	25.9
19374979	39014058	21633271	72	2	1	80.55	NA	32	67	14	100	3	4	1	0	0	0	1	0	0	0	0	0	199.45	1	2/10/2146 10:33:00	2/10/2146 10:31:00	1991.58	-1485.26	1559.41	1	28	0	0	1	76	15.61	16.2	1	0.7	2.2	16	33	2	NA	NA	20.4	1.9	29.5
19381140	32189009	26947371	60	2	2	59	NA	82	76	22	90	8	4	1	0	0	1	0	0	0	0	0	0	27.33	1	15/6/2163 08:30:00	13/6/2163 22:20:00	7115.94	-215.98	-2709.11	1	40	0	0	1	140	NA	19.79	0	0.5	2.8	51	123	0.8	NA	NA	13.9	1.3	30.3
19381435	34161199	29374324	61	2	2	160.9	170	113	85	25	100	3	5	1	1	0	1	1	0	0	0	0	0	19	1	12/1/2143 20:00:00	12/1/2143 19:00:00	-4080	-1670	-1240	0	0	0	0	0	0	NA	6.87	0	1.2	NA	NA	NA	NA	NA	NA	34.7	3.5	31.3
19398714	39006308	29356596	82	1	1	81	NA	71	84	22	92	3	11	0	1	0	1	1	0	0	0	0	0	100.67	1	3/2/2116 06:30:00	2/2/2116 22:45:05	317.17	-930	459.76	0	0	0	0	0	0	7.05	6.52	1	1.5	2.2	18	35	0.9	NA	NA	13.4	1.2	31.5
19415216	38669895	21787557	65	2	1	112	NA	125	83	18	99	12	7	1	1	0	1	1	0	0	0	0	0	0	0	0	21/10/2124 10:16:12	1973.85	800.57	1031.15	0	0	0	0	1	76	2.57	2.6	1	1.2	4.3	84	97	1.6	NA	NA	23.1	2.2	33
19422102	39954437	25458083	68	1	2	119.6	183	68	78	25	98	6	5	1	1	0	0	0	0	0	0	0	0	137	1	8/6/2176 03:00:00	7/6/2176 23:47:00	-1004.99	1142.22	766.74	0	0	0	0	1	8	NA	8.74	0	1.3	3.9	18	17	0.4	NA	NA	13.6	1.2	28.6
19439230	34427218	28395225	92	2	1	40	NA	84	63	22	98	5	6	0	0	0	1	1	0	1	0	0	0	48.47	1	25/7/2180 20:47:00	25/7/2180 20:05:00	66	152	-1430.7	0	0	0	0	1	16	NA	8.92	0	1.1	NA	NA	NA	NA	NA	NA	34.4	3.6	37.5
19444420	33902904	25424477	81	2	2	45.3	150	113	77	31	100	8	10	0	0	0	0	0	0	0	0	0	0	68	1	21/2/2136 14:00:00	21/2/2136 09:17:24	2515.11	1245.04	1339.79	1	35	1	400	1	68	10.1	10.6	1	0.7	NA	NA	NA	1	NA	NA	10.1	0.9	26.7
19456433	31435957	28924889	75	2	1	90	157	110	93	35	100	7	8	0	0	0	1	0	0	0	0	0	0	229	1	19/1/2140 16:00:00	17/1/2140 02:09:59	-4124.7	-2889.77	-2152.51	0	0	0	0	1	208	60.91	21.58	0	0.6	3.4	43	37	0.6	NA	NA	15.5	1.4	26.6
19460532	36804307	20239986	75	2	1	96	165	97	51	23	94	11	6	0	0	0	0	0	1	0	0	0	0	156.77	1	26/10/2113 20:14:00	26/10/2113 12:47:41	8389.3	2885.57	-790.81	0	0	0	0	1	8	NA	15.14	0	0.5	2.6	102	160	3.1	NA	NA	12.2	1	35
19470120	36204298	24248394	76	1	2	73.0333	NA	85	76	18	93	4	5	0	0	0	1	1	0	0	0	0	0	281	1	3/9/2183 10:00:00	3/9/2183 09:58:13	-1725.8	226.9	-2674.17	0	0	0	0	1	2	11.59	12.06	1	0.8	2.7	45	25	0.9	NA	NA	11.8	1.1	29.9
19480385	33230787	28890995	44	2	1	121.7	165	96	79	23	98	5	1	1	0	0	0	0	0	0	0	0	0	125	1	17/11/2143 03:00:00	17/11/2143 02:32:00	5910.78	1343.75	-91.41	1	20	0	0	0	0	NA	11.57	0	0.6	2.9	27	59	0.7	NA	NA	16	1.4	31.1
19487902	34090585	27723653	77	2	1	119	157	110	75	15	99	10	4	1	0	0	0	1	0	0	0	0	0	232.17	1	17/7/2180 11:00:00	16/7/2180 20:35:00	4611.34	1087.7	8.2	1	310	0	0	1	130	294.25	45.98	0	0.9	2.6	8	12	0.5	NA	NA	14.3	1.3	26
19509694	33964764	28064529	52	1	2	85.6	173	110	87	26	92	4	4	0	0	0	1	1	0	0	0	0	0	144.5	1	8/5/2172 05:30:00	8/5/2172 05:12:00	-1255.57	2142.07	432.64	0	0	0	0	1	32	1537.82	8.67	0	1.1	2.8	20	41	0.3	NA	NA	13.8	1.3	38.7
19533878	38211674	23245888	75	2	1	95.6	150	82	82	18	89	7	6	0	0	0	0	1	0	0	0	0	0	359	1	9/1/2184 21:00:00	9/1/2184 20:54:37	-1973.8	453.6	-502.07	0	0	0	0	0	0	15.13	15.24	1	2.8	3.2	3	13	0.2	NA	NA	19.4	1.8	27.7
19540062	37846841	29535797	44	2	2	248	NA	114	110	36	88	4	1	1	0	0	0	0	0	0	0	0	0	79.95	1	4/9/2120 21:32:00	4/9/2120 21:30:00	-5118.63	-3104.57	-2108	0	0	0	0	0	0	NA	4.78	0	0.7	NA	NA	NA	NA	NA	NA	13.2	1.1	150
19542641	33365187	26049770	69	1	2	69.5	183	92	80	15	100	3	3	1	0	0	0	0	0	0	0	0	0	20	1	22/1/2158 20:00:00	21/1/2158 05:22:00	680.78	330	80	1	60	0	0	0	0	207.81	5.63	0	0.9	3	71	32	0.3	NA	NA	11.9	1.1	27.9
19548130	32340478	22536308	80	2	2	71.6	NA	121	51	27	93	6	8	0	0	0	1	1	0	0	0	0	0	164.67	1	13/1/2149 21:20:00	13/1/2149 21:06:28	4919.76	1001.01	-1400	1	355	0	0	1	8	141.14	10.86	0	1.9	NA	NA	NA	0.3	NA	NA	NA	NA	NA
19600567	34558300	26080447	80	2	1	51.2	NA	93	84	21	99	7	6	1	0	0	0	1	0	0	0	0	0	75.05	1	14/4/2131 05:00:00	14/4/2131 04:01:00	2169.16	112.36	260	1	40	0	0	1	8	NA	4.76	0	1.2	3.4	9	14	0.3	NA	NA	9.7	0.9	31.1
19602520	38294239	26356034	67	1	2	98.5	178	82	89	22	96	6	3	1	0	0	0	1	0	0	0	0	0	169	1	20/3/2151 05:00:00	19/3/2151 03:33:00	1795.18	-205.8	-1525.25	0	0	0	0	0	0	NA	16.53	0	6.9	NA	24	32	0.2	NA	NA	12.6	1.2	28.9
19621383	35094589	22879472	85	1	2	76	163	75	105	15	62	5	5	0	0	0	0	1	0	0	0	0	0	77	1	28/1/2128 07:00:00	28/1/2128 06:15:00	-1992.3	-3196.44	-211.66	0	0	0	0	0	0	44.78	7.4	0	0.9	NA	NA	NA	NA	NA	NA	17.2	1.6	NA
19630013	35916115	29671746	68	2	1	NA	NA	81	69	17	100	3	3	1	0	0	0	0	0	0	0	0	0	185.17	1	21/8/2121 21:00:00	21/8/2121 17:34:37	3907.05	841.25	-1408.92	1	450	0	0	1	60	NA	13.34	0	0.7	NA	NA	NA	NA	NA	NA	11.3	1	26.1
19631559	30824302	27777427	70	1	2	150.6	178	68	84	25	97	9	7	1	1	0	1	1	0	0	0	0	0	17.7	1	3/8/2158 14:18:00	26/7/2158 05:50:00	4508.99	62.42	-2859.89	0	0	0	0	1	16	592.78	17.6	0	1.6	3.2	32	15	1	NA	NA	16.2	1.5	32.3
19641231	39631470	24876133	71	2	2	81	NA	107	68	25	93	7	6	0	1	0	0	1	0	0	0	0	0	46.5	1	21/4/2123 12:00:00	20/4/2123 02:11:00	2048	2130	136	0	0	0	0	0	0	NA	17.59	0	1	3.2	350	572	1.1	NA	NA	19.9	1.8	20.1
19653270	33645215	27504557	49	1	2	137.9	183	77	80	18	96	5	2	0	1	0	0	1	0	0	0	0	0	90	1	10/1/2181 13:00:00	10/1/2181 12:59:00	1277.43	-3276.02	-1495.94	0	0	0	0	0	0	NA	6.11	0	1.3	3.5	20	18	0.2	NA	NA	12.6	1.2	28.1
19682482	32869739	23113451	67	2	1	108.4	NA	90	68	17	98	12	7	0	1	0	0	1	1	0	0	0	0	141.62	1	4/7/2127 23:00:00	4/7/2127 22:18:03	-1407.77	-1093.97	785	0	0	0	0	1	8	83.07	22.84	0	3.7	3.2	20	30	1	NA	NA	13.5	1.2	26.7
19708034	35248946	28859500	67	1	2	95	178	51	90	15	99	9	4	0	1	0	0	0	0	0	0	0	0	98	1	10/5/2139 08:00:00	10/5/2139 07:28:57	-652.53	-1344.52	-1701.82	0	0	0	0	1	8	NA	6.4	0	0.7	3.5	31	28	0.5	NA	NA	10.9	1	27.5
19717536	31014869	27027575	88	2	2	114.8	168	72	72	20	96	5	10	0	0	0	1	1	0	0	0	0	0	25	1	5/2/2201 04:00:00	3/2/2201 22:26:00	1225.83	-610.17	568.39	1	45	0	0	0	0	836.13	13.82	0	2.5	NA	NA	NA	0.3	NA	NA	15.5	1.4	31.9
19734681	31636736	25983525	62	1	2	91.7	203	61	117	13	96	3	6	1	1	0	0	1	0	0	10	1	15/9/2129 19:36:00	353.95	1	8/9/2129 06:03:00	8/9/2129 04:47:00	1235	1199.22	3613.77	1	261	0	0	1	796.5	15.86	16.22	1	3.9	2.8	5468	17600	3.1	NA	NA	13.9	1.2	35.5
19740018	33123025	29882123	84	1	1	82.5	NA	65	90	16	100	14	9	0	0	0	1	1	0	0	0	0	0	26	1	15/2/2167 20:00:00	9/2/2167 22:34:21	1753.99	1644.6	-284.03	1	50.1	1	400	0	0	29	29.37	0	1.5	1.7	22	47	0.9	NA	NA	16.1	1.5	33.6
19762081	35729583	24280500	80	2	1	68.5	163	77	72	15	100	3	5	0	0	0	1	0	0	0	0	0	0	195.88	1	1/10/2130 12:07:00	1/10/2130 03:04:00	360	-675	-55	1	120	0	0	1	1.5	NA	8.76	0	0.8	3.2	94	43	0.3	NA	NA	12.9	1.2	28.6
19768936	39702835	28537012	60	1	2	61.55	180	106	81	22	95	9	9	0	0	0	0	1	0	0	0	0	0	94.22	1	27/11/2183 22:00:00	27/11/2183 21:40:10	2827.8	399.02	-1899.33	1	50	0	0	1	68	3525.1	9.83	0	1.3	2.2	1685	249	3.2	NA	NA	14	1.3	29.6
19770182	38022609	25926457	65	1	2	144.975	175	63	NA	23	100	16	8	0	1	0	1	1	0	0	5	1	30/4/2150 19:30:00	106.93	1	30/4/2150 07:04:00	30/4/2150 02:45:21	4199	2767.35	3408.36	0	0	0	0	1	10	4.89	4.89	1	2.1	2.6	21	39	0.9	NA	NA	22.8	2.1	33.3
19781706	37929567	29021080	62	1	2	78	170	83	114	0	96	6	3	1	0	0	0	0	0	0	0	0	0	236.6	1	27/9/2126 23:24:00	27/9/2126 23:15:28	609.79	-972.53	-729.98	1	6	0	0	1	40	NA	31.64	0	0.8	2.5	34	31	0.2	NA	NA	13.6	1.3	32.1
19787228	35856224	29570125	83	2	2	80.4	NA	106	80	16	97	6	8	1	0	0	1	0	0	0	0	0	0	171.38	1	4/7/2142 00:37:00	4/7/2142 00:07:00	4886.91	315.99	-1973.75	1	182.5	0	0	1	188	51.07	23.75	0	0.5	3	31	27	0.2	NA	NA	41.1	4.3	35.6
19796013	39076122	24367668	52	1	1	90.8	173	90	88	17	92	11	4	1	1	0	1	1	0	0	11	1	13/5/2147 19:00:00	109	1	30/5/2147 12:00:00	12/5/2147 20:29:45	4454.64	3907.45	4538.73	0	0	0	0	1	128	1476.15	22.86	0	2.7	2.4	23	31	0.1	NA	NA	11.5	1.1	31.8
19809456	31941769	21517503	83	2	2	59.5	160	92	74	23	80	6	6	1	1	0	0	0	0	0	0	0	0	69.87	1	29/11/2175 18:08:00	29/11/2175 17:55:00	1400.12	-1268.42	-455	1	100	0	0	0	0	538.28	5.79	0	0.6	NA	NA	NA	NA	NA	NA	12	1.1	28
19812722	36618594	28845899	59	2	1	47	157	73	114	18	98	13	2	1	0	0	0	0	0	0	0	0	0	69	1	5/1/2127 20:00:00	3/1/2127 13:45:00	4215.18	1009.38	-103	1	34	0	0	0	0	NA	6.24	0	0.5	NA	46	39	0.5	NA	NA	11.2	1	27.1
19819954	30259643	26202880	45	1	1	69.7	170	70	77	25	96	6	2	0	0	0	0	0	0	0	0	0	0	150	1	8/2/2114 14:00:00	8/2/2114 13:36:33	3344.61	306.39	-5705.28	0	0	0	0	0	0	NA	11.18	0	0.6	2.3	17	34	0.2	NA	NA	15.3	1.4	27.9
19828734	35547049	24603930	80	2	1	74	NA	137	106	32	100	3	9	1	0	0	1	1	0	0	0	0	0	68.97	1	4/7/2186 22:02:00	4/7/2186 21:58:56	713.17	-1200	-235.75	1	30	0	0	0	0	125.43	17.18	0	1	3	NA	NA	NA	NA	NA	NA	NA	NA
19831143	36782338	27576865	61	2	2	44.7	170	117	110	26	94	1	3	0	0	0	0	0	0	0	0	0	0	140.18	1	6/10/2177 18:00:00	6/10/2177 17:45:00	-63.96	1304.3	1295.4	0	0	0	0	0	0	NA	9.04	0	0.8	NA	29	NA	NA	NA	NA	NA	NA	NA
19835849	39589498	25607631	91	2	2	81	NA	111	100	17	100	11	14	1	1	0	0	1	0	0	0	0	0	6.27	1	20/10/2139 05:44:00	20/10/2139 05:29:56	35.53	705	-5100	0	0	0	0	0	0	12.15	12.15	1	1.3	2.5	69	101	0.2	NA	NA	12.5	1.2	92.8
19836124	32995033	23996281	76	2	2	110.35	168	118	120	23	99	2	13	1	1	0	1	1	0	0	0	0	0	19.78	1	3/4/2145 22:13:00	3/4/2145 22:00:37	2665.25	-1010	-775	0	0	0	0	0	0	NA	9.72	0	1.4	2.5	NA	NA	3.1	NA	NA	14.6	1.3	27.2
19836795	33962052	25062453	70	2	1	66.4333	155	106	80	28	100	4	7	0	0	0	1	1	0	0	0	0	0	107.97	1	1/4/2141 00:09:00	31/3/2141 19:02:00	-1600.5	-1255.63	-2168	1	40	0	0	1	388	101.27	51.91	0	1.3	3.1	37	21	0.4	NA	NA	13.7	1.3	25.9
19843082	39164071	23323137	59	2	1	70	163	89	46	18	91	7	3	0	0	0	1	0	0	0	0	0	0	247	1	2/6/2151 01:00:00	1/6/2151 21:35:28	972.13	-0.43	1947.79	1	370	0	0	1	8.5	1708.24	18.88	0	0.7	2.9	33	54	0.6	NA	NA	13.2	1.2	49.3
19865314	37193920	21729339	60	1	2	119.8	188	108	85	12	99	7	5	0	1	0	1	1	0	0	0	0	0	0	0	0	2/3/2173 07:41:00	2198.5	1432.76	952.41	0	0	0	0	1	16	14.78	15.46	1	2	4.2	19	41	0.4	NA	NA	11.7	1	22.7
19875661	34124396	21531623	92	2	1	74.9	NA	79	93	22	94	3	6	0	0	0	1	1	0	0	0	0	0	133.27	1	6/11/2177 05:44:00	6/11/2177 05:11:00	2274.07	-25.03	-1390	0	0	0	0	0	0	11.82	11.65	1	1.5	NA	NA	NA	NA	NA	NA	22.3	2.1	34.8
19885137	33782721	21907723	63	2	1	71	160	91	113	16	87	4	8	0	0	0	1	1	0	0	0	0	0	200.52	1	4/4/2158 19:29:00	4/4/2158 19:16:56	-952.07	-17.89	315	1	40	0	0	0	0	16.12	11.9	1	1.5	NA	20	16	0.3	NA	NA	12	1.1	30.8
19889033	33102854	24646975	54	1	1	115.867	NA	85	98	15	95	5	2	0	0	0	0	0	0	0	0	0	0	116.5	1	20/3/2131 16:00:00	9/3/2131 06:24:00	-10	-2.6	-1971.61	0	0	0	0	1	60	NA	20.41	0	1.1	3.2	22	38	0.4	NA	NA	15.8	1.4	38.1
19889144	35475418	23805161	71	1	1	76	173	61	103	15	99	2	10	1	1	0	1	1	0	0	3	1	7/2/2114 22:00:00	136.08	1	2/2/2114 20:31:00	2/2/2114 19:40:55	540.28	1176.66	-36.2	1	44	1	2000	1	384	7.3	7.74	1	0.6	3.1	19	14	0.1	NA	NA	15.4	1.3	26.4
19895419	37980053	20337289	60	1	2	132.133	173	90	82	35	85	4	6	0	1	0	1	1	0	1	0	0	0	366.3	1	28/6/2127 21:41:00	27/6/2127 17:51:00	-1282.68	1110.88	1737.82	0	0	0	0	1	324	NA	37.01	0	1.1	2.8	35	64	0.5	NA	NA	11.4	1.1	30.1
19908643	32482385	27716210	48	2	1	47.3	NA	103	90	28	96	0	1	0	0	0	0	0	0	0	0	0	0	62.77	1	11/7/2180 13:14:00	11/7/2180 10:51:10	-850	-685	-450	1	60	0	0	0	0	NA	7.43	0	0.6	NA	NA	NA	NA	NA	NA	11.4	1.1	27.9
19909892	32631383	21406474	72	2	1	97.35	165	71	52	12	100	7	4	1	0	0	0	0	0	0	0	0	0	72.67	1	20/12/2154 11:20:00	20/12/2154 10:05:15	4667.37	-581.06	-2631.67	0	0	0	0	1	132	NA	8.38	0	1.1	NA	NA	NA	NA	NA	NA	15.2	1.3	36.1
19917153	34609463	29595690	62	2	1	40	168	87	81	20	95	6	3	1	0	0	0	0	0	0	0	0	0	293.63	1	11/1/2172 11:00:00	10/1/2172 04:15:32	1343.87	1120.14	126.37	0	0	0	0	1	24	NA	27.54	0	0.4	3.1	72	84	0.4	NA	NA	11.9	1.1	38.1
19919980	37603454	27903537	80	1	2	105.6	173	96	73	20	97	5	10	0	1	0	1	0	0	1	0	0	0	110	1	25/7/2124 21:00:00	25/7/2124 20:50:00	-2624.38	4283.32	2214.48	0	0	0	0	1	8	5.19	6.03	1	1.1	NA	25	43	1.2	NA	NA	14.2	1.3	25.6
19952398	32679065	24995993	70	1	1	80	178	70	79	20	99	3	9	0	1	0	1	1	0	1	0	0	0	186.97	1	9/4/2127 20:02:00	9/4/2127 19:08:03	1408.33	-174.5	215	0	0	0	0	0	0	86.2	12.95	0	2.1	NA	NA	NA	NA	NA	NA	13.1	1.1	27.1
19961827	37587275	20867827	53	2	1	122	NA	97	91	19	94	1	3	0	0	0	0	0	0	0	0	0	0	31.57	1	3/7/2167 18:00:00	3/7/2167 16:51:41	-70.15	-820	-1320	1	10	0	0	0	0	NA	5.13	0	0.7	NA	NA	NA	NA	NA	NA	13.3	1.2	53.1
19962126	39986786	21472938	72	1	2	67.5	NA	77	101	21	100	10	5	0	0	0	1	1	0	0	0	0	0	75.57	1	24/2/2145 11:26:00	20/2/2145 14:27:00	7377.7	690.71	553.15	1	40	0	0	1	8	NA	14.13	0	1.4	3.2	23	39	0.3	NA	NA	10.3	1	27.6
19965144	39622715	23909942	77	1	2	80.15	165	112	75	25	92	2	6	1	1	0	1	0	0	0	0	0	0	143.45	1	6/3/2184 17:38:00	6/3/2184 17:17:04	-770.84	-961.82	-1309.82	1	100	0	0	0	0	NA	8.93	0	1.5	NA	24	32	0	NA	NA	20.4	1.9	43
19975796	31651964	25848942	70	2	1	72	165	80	58	13	95	8	3	1	0	0	0	0	0	0	0	0	0	107	1	3/12/2148 00:03:00	3/12/2148 00:01:00	5080.65	3771.16	1836.35	1	80	0	0	1	16	1646.08	11.74	0	0.9	NA	419	404	0.4	NA	NA	13.7	1.2	25.9
[truncated: 39 more columns]

## Sheet: missing_summary
Variables with more than 20% missing data: height, first_albumin, first_alanineaminotransferasealt,first_asparateaminotransferaseast,first_bilirubintota, first_estimatedgfrmdrdequation1, first_estimatedgfrmdrdequation2,first_ddimer1, first_ddimer2, first_fibrinogenfunctional,first_fibrindegradationproducts,first_eosinophils,first_basophils,first_absoluteneutrophilcount,first_absolutelymphocytecou…
