# Supplementary material
Source: Research Square preprint supplement (doi:10.21203/rs.3.rs-8715774/v1)
Supplement: Supplementary file 4 [file 828fcafe3178a426475c8aa2.docx]

**Supplementary Table S3. Statistics for choosing the best number of Classes.**

|  | G | Loglik | Conv | npm | AIC | BIC | ΔBIC | BLRT | OCC | Avepp | Class1(%) | Class2(%) | Class3(%) | Class4(%) | Class5(%) |
| --- | --- | --- | --- | --- | --- | --- | --- | --- | --- | --- | --- | --- | --- | --- | --- |
| Model1 | 1 | -4673.6758 | 1 | 4 | 9355.352 | 9377.586 | NA | NA | NA | 1.0000000 | 100 |  |  |  |  |
| Model2 | 2 | -4383.5779 | 1 | 8 | 8783.257 | 8827.725 | -549.9 | P < 0.001 | 17.343569 | 0.9027886 | 66.35 | 33.65 |  |  |  |
| Model3 | 3 | -4327.7609 | 1 | 14 | 8683.522 | 8761.341 | -66.4 | P < 0.001 | 42.512668 | 0.8959446 | 49.29 | 36.78 | 13.93 |  |  |
| Model4 | 4 | -4309.5172 | 1 | 17 | 8653.964 | 8748.459 | -12.9 | P < 0.001 | 45.69602 | 0.8949671 | 53.52 | 20.03 | 12.52 | 13.93 |  |
| Model5 | 5 | -4277.2947 | 1 | 23 | 8600.594 | 8728.440 | -20.0 | P < 0.001 | 82.49449 | 0.907988 | 13.30 | 16.59 | 39.44 | 21.13 | 9.54 |

G, Number of trajectory groups; Loglik, Log-likelihood value, higher values indicate better model fit; Conv, Convergence status (1 indicates convergence); npm:, Number of model parameters; AIC, Akaike Information Criterion, smaller values preferred; BIC, Bayesian Information Criterion, smaller values preferred; △BIC, BIC difference between adjacent models, negative values favor more complex models; BLRT, Bootstrap Likelihood Ratio Test, P<0.001 indicates significant improvement; OCC, Odds of Correct Classification, >5 indicates high classification accuracy; Avepp, Average posterior probability, >0.7 indicates reliable classification; Class1-5(%), Percentage distribution across trajectory groups.
